# Supplementary material for: Comprehensive Pan-Cancer Analyses of Immunogenic Cell Death as a Biomarker in Predicting Prognosis and Therapeutic Response
Source: Cancers (Basel). 2022 Dec 1;14(23):5952. doi: 10.3390/cancers14235952 (PMC9736000; doi:10.3390/cancers14235952)
Supplement: Supplementary file 1 [file cancers-14-05952-s001.zip]

Archive with 13 entries (13 files):
- cancers-1988425-Supplementary material.pdf
- Figure S1.tif
- Figure S2.tif
- Figure S3.tif
- Figure S4.tif
- Figure S5.tif
- Figure S6.tif
- Table S1.xlsx
- Table S2.xlsx
- Table S3.xlsx
- Table S4.xlsx
- Table S5.xlsx
- Table S6.xlsx
