# Supplementary material for: Comprehensive Pan-Cancer Analyses of Immunogenic Cell Death as a Biomarker in Predicting Prognosis and Therapeutic Response
Source: Cancers (Basel). 2022 Dec 1;14(23):5952. doi: 10.3390/cancers14235952 (PMC9736000; doi:10.3390/cancers14235952)
Supplement: Supplementary file 1 [file cancers-14-05952-s001.zip › Table S1.xlsx]

## Sheet: Sheet1
Clinical Cohort	Cancer Type	Accession Number	Number of Cancer Samples	Number of Normal Samples
TCGA cohort	bladder cancer	TCGA BLCA	411	19
	breast cancer	TCGA BRCA	1104	113
	cervical cancer	TCGA CESC	306	3
	bile duct cancer	TCGA CHOL	36	9
	colon cancer	TCGA COAD	471	41
	large B cell lymphoma	TCGA DLBC	48	0
	esophageal cancer	TCGA ESCA	162	11
	glioblastoma	TCGA GBM	168	5
	head and neck cancer	TCGA HNSC	502	44
	kidney chromophobe	TCGA KICH	65	24
	kidney clear cell carcinoma	TCGA KIRC	535	72
	kidney parpillary cell carcinoma	TCGA KIRP	289	32
	acute myeloid leukemia	TCGA LAML	151	0
	lower grade glioma	TCGA LGG	529	0
	liver cancer	TCGA LIHC	374	50
	lung adenocarcinoma	TCGA LUAD	526	59
	lung squamous cell carcinoma	TCGA LUSC	501	49
	mesothelioma	TCGA MESO	86	0
	ovarian cancer	TCGA OV	379	0
	pancreatic cancer	TCGA PAAD	178	4
	pheochromocytoma & paraganglioma	TCGA PCPG	183	3
	prostate cancer	TCGA PRAD	499	52
	rectal cancer	TCGA READ	167	10
	sarcoma	TCGA SARC	263	2
	stomach cancer	TCGA STAD	375	32
	testicular cancer	TCGA TGCT	156	0
	thyroid cancer	TCGA THCA	510	58
	thymoma	TCGA THYM	119	2
	endometrioid cancer	TCGA UCEC	548	35
	uterine carcinosarcoma	TCGA UCS	56	0
	ocular melanomas	TCGA UVM	80	0
	adrenocortical cancer	TCGA ACC	79	0
	melanoma	TCGA SKCM	471	0
immunotherapy cohort	non-small-cell lung cancer	GSE126044	16	0
	melanoma and NSCLC	GSE91061	105	0
	bladder cancer	IMvigor210	255	0
single-cell RNA-seq cohorts	cholangiocarcinoma	GSE146409	2	0
	colorectal cancer	GSE166555	12	0
	glioma	GSE202096	1	0
	non-small-cell lung cancer	GSE117570	4	0
	papillary thyroid carcinoma	GSE191288	4	0
	triple negative breast cancer	GSE143423	3	0
	melanoma	GSE115978	31	0
	prostate cancer	GSE141445	13	0
	esophageal adenocarcinoma	GSE173950	22	0
