# Supplementary material for: Comprehensive Pan-Cancer Analyses of Immunogenic Cell Death as a Biomarker in Predicting Prognosis and Therapeutic Response
Source: Cancers (Basel). 2022 Dec 1;14(23):5952. doi: 10.3390/cancers14235952 (PMC9736000; doi:10.3390/cancers14235952)
Supplement: Supplementary file 1 [file cancers-14-05952-s001.zip › Table S2.xlsx]

## Sheet: ICD-related genes
Gene
ENTPD1
NT5E
CALR
HMGB1
HSP90AA1
ATG5
BAX
CASP8
PDIA3
EIF2AK3
PIK3CA
CXCR3
IFNA1
IFNB1
IL10
IL6
TNF
CASP1
IL1R1
IL1B
NLRP3
P2RX7
LY96
MYD88
TLR4
CD4
CD8A
CD8B
FOXP3
IFNG
IFNGR1
IL17A
IL17RA
PRF1

## Sheet: Machine Learning
Machine learning algorithm	Gene
Random Forest	IL10
	IL6
	PRF1
	CD8A
	PIK3CA
	P2RX7
	TNF
	CASP1
	CD8B
	LY96
	CD4
	CXCR3
	NLRP3
	IL1B
Boruta	ENTPD1
	NT5E
	CALR
	HMGB1
	HSP90AA1
	ATG5
	BAX
	CASP8
	PDIA3
	EIF2AK3
	PIK3CA
	CXCR3
	IL10
	IL6
	TNF
	CASP1
	IL1R1
	IL1B
	NLRP3
	P2RX7
	LY96
	MYD88
	TLR4
	CD4
	CD8A
	CD8B
	FOXP3
	IFNG
	IFNGR1
	IL17RA
	PRF1
XGBoost	IL10
	IL6
	PIK3CA
	FOXP3
	CALR
	CASP8
	EIF2AK3
	TNF
	PRF1
	HMGB1
	BAX
	ATG5
	IFNGR1
svm	PRF1
	IL6
	IFNG
