# Supplementary material for: Comprehensive Pan-Cancer Analyses of Immunogenic Cell Death as a Biomarker in Predicting Prognosis and Therapeutic Response
Source: Cancers (Basel). 2022 Dec 1;14(23):5952. doi: 10.3390/cancers14235952 (PMC9736000; doi:10.3390/cancers14235952)
Supplement: Supplementary file 1 [file cancers-14-05952-s001.zip › Table S3.xlsx]

## Sheet: immunotherapy cell markers
Gene	Cell Type
ACTA2	Tcell
PTPRC	Tcell
CD3D	Tcell
CD3E	Tcell
CD4	Tcell
CD8A	Tcell
FOXP3	Tcell
KLRD1	Tcell
CD19	Bcell
CD79A	Bcell
MS4A1	Bcell
FGF7	Endothelial
MME	Endothelial
COL1A1	Endothelial
ACTA2	Endothelial
PECAM1	Endothelial
VWF	Endothelial
PROX1	Endothelial
EPCAM	tumor
KRT19	tumor
KRT7	tumor
KRT8	tumor
KRT18	tumor
PROM1	tumor

## Sheet: simplied cell markers
Gene	Cell Type
PTPRC	immune cell
EPCAM	epithelial cell
MME	stromal cell
PECAM1	stromal cell

## Sheet: iCMS cell markers
iCMS2_Up	iCMS2_Down	iCMS3_Up	iCMS3_Down
CXCL14	GBA2	AL445524.1	AQP8
LY6G6F-LY6G6D	IL18	TNFRSF10B	SLC26A2
EREG	FA2H	DNAJC10	PCSK1N
TIMP3	TP53I3	IGHG4	MS4A12
KRT23	BAIAP2L2	TSTA3	FABP1
RUBCNL	NPTN	PFKP	TLE2
PLTP	PPP2CB	RASL11A	CA4
TNNC2	STXBP5	LIPG	UGT2A3
GGH	LAMA3	RAB15	CEACAM7
FN1	TRIP11	CTNNBIP1	SLC39A5
TDGF1	CCNG2	MUC17	MOGAT3
ARID3A	HIPK1	ATL3	ZBTB10
PTPRO	PPP1R12B	ADAM9	CEBPA
CYP2W1	UGDH	SEZ6L2	ID1
TSPAN6	NUMB	LPIN1	CKB
FGGY	FLII	ATP1B1	SATB2
DPEP1	PDLIM5	PPP6R1	VAV3
AXIN2	ZNF24	DEPP1	SEMA5A
PRSS23	ACADS	WARS	CFTR
PLIN2	ARSA	S100A13	C10orf99
PLCB4	ATP8A1	C9orf3	HNF4A
RNF43	COPG1	DPYSL2	CDX2
PFDN4	TLN2	MMP7	PM20D2
ASCL2	SMAD4	CDKN2A	SLC26A3
PRR15	RNF19B	TVP23B	ARSE
DDX27	ALDH6A1	S100P	NOX1
QPRT	ATP5F1A	CLU	MEP1A
AP003774.4	VAPA	SERPINB5	SELENOP
LCN15	PCM1	CYR61	DDC
POFUT1	RNASE1	EPS8L1	PID1
CPNE1	ALDOB	TRIM29	AIFM3
AREG	RIOK3	SDR16C5	ST6GAL1
MYC	LMAN1	PRSS2	CDHR1
OSER1	LRP10	RGS10	FCGRT
ZNF503	NDRG2	MYOF	SPINK1
SLC5A6	NAA38	TMEM92	ESPN
NELFCD	TFF3	IFI16	GJB1
DPM1	ACER3	TYMP	NXPE4
FARP1	KIAA1522	CA9	CHP2
TP53RK	SHROOM3	TPGS1	PKIG
ARHGAP45	PLA2G10	CDC42EP1	PPP1R14D
EIF6	CCAR2	BNIP3L	SMAP1
ACOT8	TOR4A	STIM2	A1CF
NKD1	CASC4	LINC00467	TFCP2L1
CTNNBL1	HES4	AGRN	THBS1
YWHAB	MPDU1	ME1	RETREG1
TRIB3	RHOBTB3	RGS2	MAPK13
PSMA7	RNF138	EGLN3	ATP10B
TOP1MT	CHCHD10	IFI6	NUAK2
RAB5IF	MFHAS1	FUT8	MAVS
MAPRE1	FOXP1	CD55	AKAP1
AHCY	VILL	PMP22	SHD
ATP9A	AKAP13	KDELR3	KLC4
CTSA	LGR4	CFD	PHYH
RAE1	PTPN18	ANXA1
NEU1	GOLM1	AC020656.1
C8orf33	AKT1	COL16A1
CDK5RAP1	POLD3	KRT7
GPSM2	ABO	ANKRD36C
PRPF6	TENT5A	REG3A
TOMM34	LMNA	C4BPB
SCML1	VAMP2	SYTL1
STK4	CASZ1	KLK11
DDAH2	ASAP2	RARRES3
RTF2	PPP3CA	TFF2
PMEPA1	TMED7	DUSP4
FERMT1	FBXW5	TFF1
PRELID3B	GNAQ	NDUFA4L2
UCA1	RCOR1	AQP3
GABRE	AP001816.1	RAMP1
EIF2S2	DIP2A	F3
PDRG1	RNF11	LYZ
NFS1	P2RX4	MUC5AC
PCMTD2	NDUFV2	TM4SF4
RNF114	NBL1
ANO9	IER3IP1
FUNDC2	ERGIC1
ZDHHC9	CARD16
UTP14A	PADI2
STAU1	GPRIN3
DAB2	PTPRF
COMMD7	CXXC1
SERPINE2	GSTZ1
IFITM1	FFAR4
RNF113A	SCP2
FMR1	MYO5C
PRAP1	DHRS1
UCKL1	SLC9A1
DNTTIP1	GSKIP
ADRM1	CRACR2B
PROSER1	CANT1
GTF2F2	GSR
ASXL1	SCNN1A
GID8	SMPDL3A
DKC1	PTGFRN
GTF2IRD1	SPRED1
NDRG3	MBP
NEK3	CLSTN1
STX16	BTBD6
SERINC3	GPT
CHCHD7	STXBP6
TIMM8A	TUBB2A
CARS2	MPPE1
RRS1	TMEM30B
ZMYND8	LMF2
TPD52L2	PQLC1
PEPD	TMED10
CSE1L	AHNAK
UCHL3	NUDT8
SLC2A8	MCU
CYB5B	C18orf32
GAL	SLC28A2
PIGU	DMBT1
VAPB	PDE4DIP
PARD6B	NEU4
NCOA3	TNIK
RALY	KIAA1468
C20orf27	MIA2
EDN1	FRMD4B
PHF20	UNC13B
DEFA6	SLC22A23
DYNLRB1	HIPK2
LAS1L	NEO1
SLC20A2	IMPACT
YAE1D1	IMPA2
IGBP1	IQGAP2
FTL	DGLUCY
KPNA3	FOXA3
NKAP	GSDMB
PLAGL2	EDEM3
PQBP1	RASD1
RAB20	CKAP4
MRGBP	CAMK2D
IFT52	TCIRG1
SCAND1	SOCS6
XRN2	TCEA3
ARFRP1	UGT8
RB1CC1	S100A14
NAA20	SLC9A2
RALGAPB	SLC25A37
MPLKIP	ATP8B1
ATP5F1E	LPCAT4
EEPD1	CA7
OSBPL2	ENOSF1
PROX1	IFI27L1
C2	IGFBP2
SYS1	LIMA1
NORAD	SMAD2
FBL	RGMB
SLC7A6	RASSF6
ERGIC3	FAM114A1
SNRPB2	PTAR1
PCIF1	SH3BGRL3
RPN2	SMIM14
MCTS1	CLCA4
AURKA	CDKN2B
EIF3E	PIAS2
RAB22A	SAMD5
IRS2	PPP4R1
STRAP	AKR7A3
RBM39	ANXA13
BCAP31	FGFBP1
CCDC85B	SLC37A1
CEBPB	C2orf88
TBRG4	DENND2A
DCAF13	FABP2
RNF170	GALNT5
HELZ2	MIA3
ATP6V1H	NPDC1
ZFAS1	AC005833.1
GTF3A	SLC35A1
MICU2	SMCO4
COX19	CYSTM1
PSPH	SYT13
FNTA	NR3C2
NXT1	GALNT12
NSDHL	SMCHD1
SPATA13	GBP3
LAMP2	ST3GAL4
DNAJC5	SLC6A14
CCL20	ABHD3
DARS	NFIC
FTX	NR4A2
C6orf48	TSPAN1
PRKDC	CA12
RP9	TYMS
DIDO1	CRIP1
EIF3H	PLAC8
MRPS31	DEGS2
PET117	CEP70
YTHDF1	SIPA1L2
RNASEH2B	CCDC68
C6orf222	CA2
UTP23	KCNK1
SINHCAF	GSN
MRPS24	CRELD2
TRPC4AP	PAPSS2
LYPLA1	CHD3
NUDT4	KLF9
SPRYD7	MATN2
ADIRF	FAM107B
PCID2	SGMS2
PGRMC1	GALNT1
SLC52A2	DOCK5
TWISTNB	TC2N
UPF3A	PIGR
EPB41L5	C12orf57
TCF7	HIF1A
ZC3H13	PTPRH
SCARB1	GCNT3
GNPDA1	SMIM31
RNF6	SEC24D
TRAP1	RHBDL2
NCBP2	HID1
CHD6	TSPAN13
PDPK1	REG1B
TIMM17B	GALNT7
HUS1	MAPRE2
ASPSCR1	TMEM173
C1GALT1C1	LXN
UBAC2	TMEM263
EXOSC5	NUCB2
EDEM2	PLLP
VBP1	SERPINA1
HM13	BCAS1
NDFIP2	QSOX1
CHMP4C	ANG
RPUSD1	AMN
SLC3A2	ST6GALNAC1
CDK8	LMO4
GLA	ERN2
VMA21	KLK1
CSNK2A2	KLF2
NAE1	FOXA1
NIT2	ANPEP
COMMD6	ATP2A3
TBC1D4	MUC4
NAA10	TNFRSF11A
ABRACL	REG1A
UTP4	TPSG1
LAGE3	B3GNT7
LDHB	CDC42EP5
SLC29A1	ENTPD8
GPALPP1	VSIG2
NIP7	MMP28
TPX2	HSD17B2
MED30	RAP1GAP
MALSU1	PALLD
PAN3	MLPH
TSC22D1	AGR2
LAPTM4B	B3GALT5
DNAJC15	KIAA1324
PDP1	AGR3
OGFR	ASRGL1
EPB41L1	MUC1
SNRPB	CREB3L1
SOX4	IL1R2
ZFAND1	SPDEF
PAK1IP1	RARRES1
CDK4	LGALS2
HSD17B10	REP15
BOP1	SPON1
GPCPD1	PLA2G2A
MRPL13	L1TD1
CDC25B	UGT2B17
SUCLA2	HEPACAM2
ESF1	KCTD12
C8orf59	LRRC26
IMMP2L	MUC5B
BCL2L1	SPINK4
NHLRC3	RETNLB
RPIA	CLCA1
AC004130.1	MUC2
ABHD12	FCGBP
SLC35C2	CTSE
ARMC1	PYY
GOLGA7	REG4
TXLNG	SLC4A4
CCT6A	ITLN1
NUPL2
BLCAP
CYP2S1
CDC16
SMIM26
UBE2C
UBA2
CCDC34
COPS5
ARL4A
SLC38A5
TXNDC9
AVL9
RBMX2
RIDA
EMD
HIBADH
IPO5
ARFGAP1
MED4
MRPS17
PEX16
RRP9
CAPZA2
RPRD1B
ALKBH3
CTSH
CXCL3
SUPT20H

## Sheet: immune cell markers
Gene	Cell Type
AKNA	Activated B cells
ARHGAP25	Activated B cells
CCL21	Activated B cells
CD180	Activated B cells
CD2	Activated B cells
CD27	Activated B cells
CD37	Activated B cells
CD38	Activated B cells
CLEC17A	Activated B cells
CLEC9A	Activated B cells
CLECL1	Activated B cells
FAIM3	Activated B cells
FAM65B	Activated B cells
GIMAP4	Activated B cells
MAP4K1	Activated B cells
PAX5	Activated B cells
TNFRSF17	Activated B cells
TRAF3IP3	Activated B cells
ANLN	Activated CD4
BRIP1	Activated CD4
BUB1B	Activated CD4
CASC5	Activated CD4
CCNB1	Activated CD4
CCNB2	Activated CD4
CCNE2	Activated CD4
CEP55	Activated CD4
CKAP2L	Activated CD4
DLGAP5	Activated CD4
DTL	Activated CD4
E2F8	Activated CD4
ECT2	Activated CD4
ESCO2	Activated CD4
EXO1	Activated CD4
EXOC6	Activated CD4
FBXO5	Activated CD4
FIGNL1	Activated CD4
HELLS	Activated CD4
HMMR	Activated CD4
IARS	Activated CD4
KIF11	Activated CD4
KIF18A	Activated CD4
KIF20A	Activated CD4
KNTC1	Activated CD4
MAD2L1	Activated CD4
MASTL	Activated CD4
MTHFD2	Activated CD4
NCAPG2	Activated CD4
NCAPH	Activated CD4
NEIL3	Activated CD4
NUF2	Activated CD4
PRC1	Activated CD4
PSAT1	Activated CD4
RTKN2	Activated CD4
ADRM1	Activated CD8
AHSA1	Activated CD8
C1GALT1C1	Activated CD8
CCT5	Activated CD8
CCT6B	Activated CD8
CETN3	Activated CD8
CSE1L	Activated CD8
EIF2S1	Activated CD8
GAL	Activated CD8
GEMIN6	Activated CD8
GPT2	Activated CD8
KIAA0101	Activated CD8
MND1	Activated CD8
MPZL1	Activated CD8
MRPS16	Activated CD8
PCNA	Activated CD8
PTRH2	Activated CD8
RFC5	Activated CD8
SPC25	Activated CD8
TIMM13	Activated CD8
TIMM8B	Activated CD8
TK1	Activated CD8
TUBB	Activated CD8
TXNDC17	Activated CD8
ADAM19	Central memory CD4
AHNAK	Central memory CD4
AIM2	Central memory CD4
COL4A1	Central memory CD4
CYLD	Central memory CD4
DPEP2	Central memory CD4
EPHA4	Central memory CD4
FYN	Central memory CD4
IL6R	Central memory CD4
IPCEF1	Central memory CD4
KLF10	Central memory CD4
MAL	Central memory CD4
MALT1	Central memory CD4
NXN	Central memory CD4
OPTN	Central memory CD4
PLCL2	Central memory CD4
PNRC1	Central memory CD4
SMAD4	Central memory CD4
SPOCK2	Central memory CD4
TRIB2	Central memory CD4
TXK	Central memory CD4
ADAM23	Central memory CD8
ATP2B4	Central memory CD8
BCL2L11	Central memory CD8
CD300A	Central memory CD8
CD80	Central memory CD8
CHN1	Central memory CD8
F2R	Central memory CD8
F8	Central memory CD8
GABARAPL1	Central memory CD8
GPR183	Central memory CD8
KLRK1	Central memory CD8
MSC	Central memory CD8
PYHIN1	Central memory CD8
RCAN2	Central memory CD8
RGS1	Central memory CD8
SLAMF1	Central memory CD8
SLFN11	Central memory CD8
ZEB2	Central memory CD8
BST2	Cytotoxic cells
BTN3A2	Cytotoxic cells
IL10RA	Cytotoxic cells
KLRB1	Cytotoxic cells
LAT2	Cytotoxic cells
LILRA2	Cytotoxic cells
SELL	Cytotoxic cells
SLAMF6	Cytotoxic cells
SLAMF7	Cytotoxic cells
C1QC	DC
CCDC88A	DC
CCL13	DC
CCL3L1	DC
CCL3L3	DC
CD300E	DC
CD86	DC
CLEC1A	DC
CLEC4C	DC
CLEC5A	DC
CLIC2	DC
CSF2RA	DC
FAM49A	DC
FCGR1A	DC
FN1	DC
FSTL1	DC
GPR109B	DC
GPX3	DC
HLA-DQA2	DC
INHBA	DC
LGMN	DC
NGFR	DC
PDGFRL	DC
PDPN	DC
PRKAR2B	DC
SIGLEC1	DC
SIGLEC5	DC
SLAMF9	DC
STAB1	DC
THBD	DC
TNFAIP2	DC
TTYH2	DC
UBD	DC
VCAM1	DC
BMI1	Effector memory CD4
CASP3	Effector memory CD4
CNOT10	Effector memory CD4
COPB2	Effector memory CD4
DARS	Effector memory CD4
EXOSC9	Effector memory CD4
EZH2	Effector memory CD4
GDE1	Effector memory CD4
IFT74	Effector memory CD4
KLF5	Effector memory CD4
NDUFB9	Effector memory CD4
NUP205	Effector memory CD4
SHCBP1	Effector memory CD4
XRCC6	Effector memory CD4
APOBEC3H	Effector memory CD8
ARHGAP10	Effector memory CD8
ATP10D	Effector memory CD8
BIRC3	Effector memory CD8
C3AR1	Effector memory CD8
CCL4	Effector memory CD8
CD244	Effector memory CD8
CD55	Effector memory CD8
CFLAR	Effector memory CD8
CMKLR1	Effector memory CD8
DAPP1	Effector memory CD8
DFNB31	Effector memory CD8
DRAM1	Effector memory CD8
EFNA5	Effector memory CD8
FCGR2C	Effector memory CD8
FCGR3A	Effector memory CD8
FCRL6	Effector memory CD8
FGR	Effector memory CD8
GPR114	Effector memory CD8
GZMH	Effector memory CD8
HAPLN3	Effector memory CD8
HLA-DMB	Effector memory CD8
HLA-DPA1	Effector memory CD8
HLA-DPB1	Effector memory CD8
IFI16	Effector memory CD8
IKZF2	Effector memory CD8
IL15	Effector memory CD8
IL2RB	Effector memory CD8
JAKMIP1	Effector memory CD8
KLRD1	Effector memory CD8
LY96	Effector memory CD8
NFKBIA	Effector memory CD8
PLXNC1	Effector memory CD8
PPP4R1	Effector memory CD8
PTPN22	Effector memory CD8
RGS18	Effector memory CD8
SETD7	Effector memory CD8
SH2D1B	Effector memory CD8
SLA2	Effector memory CD8
STXBP1	Effector memory CD8
TLR5	Effector memory CD8
TYROBP	Effector memory CD8
CCL24	Eosinophil
CFD	Eosinophil
CREB3	Eosinophil
EGR1	Eosinophil
EPX	Eosinophil
FBXO16	Eosinophil
HFE	Eosinophil
HIVEP1	Eosinophil
HIVEP2	Eosinophil
MBP	Eosinophil
PRNP	Eosinophil
RNASE2	Eosinophil
RNASE3	Eosinophil
S100A4	Eosinophil
SIGLEC8	Eosinophil
ATP6V1A	iDC
C1QB	iDC
CHST11	iDC
CSF1	iDC
DPYD	iDC
FNDC3B	iDC
GRP	iDC
IL1RN	iDC
INPP5F	iDC
LPL	iDC
LPXN	iDC
MMD	iDC
PLAU	iDC
PLCB2	iDC
RAB38	iDC
RDX	iDC
RRAGD	iDC
TACSTD2	iDC
TGM2	iDC
TIMD4	iDC
TM7SF4	iDC
BANK1	Immature B cells
CD22	Immature B cells
CYBB	Immature B cells
ETS1	Immature B cells
FAM129C	Immature B cells
FCRL1	Immature B cells
FCRL2	Immature B cells
FCRL3	Immature B cells
FCRL5	Immature B cells
FCRLA	Immature B cells
HDAC9	Immature B cells
HLA-DOB	Immature B cells
HLA-DQA1	Immature B cells
HVCN1	Immature B cells
KIAA0226	Immature B cells
NCF1	Immature B cells
NCF1B	Immature B cells
P2RY10	Immature B cells
PNOC	Immature B cells
SP100	Immature B cells
STAP1	Immature B cells
TAGAP	Immature B cells
TXNIP	Immature B cells
ZCCHC2	Immature B cells
AIF1	Macrophages
CCL1	Macrophages
CCL14	Macrophages
CCL26	Macrophages
CD163	Macrophages
CD300LB	Macrophages
CNR1	Macrophages
CNR2	Macrophages
CPM	Macrophages
CSF3R	Macrophages
ENG	Macrophages
FCAR	Macrophages
IGF1	Macrophages
IL34	Macrophages
L1CAM	Macrophages
LILRA1	Macrophages
LILRA5	Macrophages
LRP1	Macrophages
MS4A7	Macrophages
MS4A8B	Macrophages
TREM1	Macrophages
TREML1	Macrophages
ACSL4	Mast cells
ADAMTS3	Mast cells
ADCYAP1	Mast cells
ARHGAP15	Mast cells
ATP8B4	Mast cells
C19orf59	Mast cells
CASQ1	Mast cells
CLC	Mast cells
CMA1	Mast cells
CPA3	Mast cells
CTSG	Mast cells
DUSP14	Mast cells
EGR3	Mast cells
EMR1	Mast cells
FST	Mast cells
HDC	Mast cells
HEY1	Mast cells
KRT1	Mast cells
LXN	Mast cells
MEIS2	Mast cells
MS4A2	Mast cells
MS4A3	Mast cells
NLRP3	Mast cells
NTRK1	Mast cells
PLAT	Mast cells
PTGS1	Mast cells
PTGS2	Mast cells
RGS16	Mast cells
SCG2	Mast cells
SDPR	Mast cells
SERPINB2	Mast cells
SIGLEC14	Mast cells
SIGLEC6	Mast cells
SLC18A2	Mast cells
SLC24A3	Mast cells
TAL1	Mast cells
TARP	Mast cells
TIE1	Mast cells
TIMP1	Mast cells
TNFAIP6	Mast cells
TSPAN4	Mast cells
VAT1	Mast cells
ATP5O	mDC
CBX1	mDC
DNAJC15	mDC
ENSA	mDC
FOXN3	mDC
PRCP	mDC
SSB	mDC
TPMT	mDC
AICDA	Memory B cells
CCNA2	Memory B cells
CDKN3	Memory B cells
CLCN5	Memory B cells
ENPP1	Memory B cells
FCER1A	Memory B cells
FCRL4	Memory B cells
MYC	Memory B cells
RUNX2	Memory B cells
SORL1	Memory B cells
SOX5	Memory B cells
STAT5A	Memory B cells
STAT5B	Memory B cells
TLR9	Memory B cells
ACTR3	Monocytes
ANXA5	Monocytes
ARPC2	Monocytes
ATP6V1B2	Monocytes
BASP1	Monocytes
CD300LF	Monocytes
DAZAP2	Monocytes
EIF4A1	Monocytes
EIF4G2	Monocytes
EMP3	Monocytes
FCN1	Monocytes
FTL	Monocytes
GABARAP	Monocytes
HIF1A	Monocytes
LITAF	Monocytes
NCOA4	Monocytes
OLR1	Monocytes
RAB1A	Monocytes
RHOA	Monocytes
SAT1	Monocytes
SDCBP	Monocytes
SRGN	Monocytes
TEK	Monocytes
TMBIM6	Monocytes
UBE2D3	Monocytes
ABTB1	Neutrophils
AMPD2	Neutrophils
CAMP	Neutrophils
EMR4P	Neutrophils
FPR1	Neutrophils
FPR2	Neutrophils
GPR77	Neutrophils
MAEA	Neutrophils
PROK2	Neutrophils
SEC14L1	Neutrophils
SEPX1	Neutrophils
SLC25A37	Neutrophils
TNFSF14	Neutrophils
TREML4	Neutrophils
VNN2	Neutrophils
XPO6	Neutrophils
AKT3	NK
AXL	NK
CDH2	NK
CRTAM	NK
CYTH1	NK
FASLG	NK
GRB2	NK
KLRG1	NK
LILRB5	NK
LST1	NK
MAPK4	NK
NOTCH3	NK
PIK3CG	NK
PILRA	NK
PLCG2	NK
SIGLEC7	NK
SIGLEC9	NK
C11orf75	NK56 bright
DYNLL1	NK56 bright
HCP5	NK56 bright
HDGFRP2	NK56 bright
KRT86	NK56 bright
MLST8	NK56 bright
MYL6B	NK56 bright
TAX1BP3	NK56 bright
AKR7A3	NK56 dim
CLTB	NK56 dim
FAM27A	NK56 dim
GLS2	NK56 dim
GPRC5C	NK56 dim
GRIN1	NK56 dim
HLA-E	NK56 dim
KIR2DS4	NK56 dim
KLHL21	NK56 dim
KRT80	NK56 dim
MPL	NK56 dim
PHRF1	NK56 dim
PORCN	NK56 dim
PQBP1	NK56 dim
PSMC4	NK56 dim
TEX264	NK56 dim
UPP1	NK56 dim
BTN2A2	NKT
CD101	NKT
GNLY	NKT
KIR2DL1	NKT
KIR2DL3	NKT
KIR3DL1	NKT
KIR3DL2	NKT
KLRC1	NKT
MICB	NKT
NCR1	NKT
NFATC2IP	NKT
TNFRSF11A	NKT
CBX6	pDC
DAB2	pDC
DDX17	pDC
HIGD1A	pDC
IDH3A	pDC
IL3RA	pDC
MAGED1	pDC
NUCB2	pDC
OFD1	pDC
OGT	pDC
PDIA4	pDC
SERTAD2	pDC
SIRPA	pDC
SPCS3	pDC
TMED2	pDC
TMX1	pDC
UGCG	pDC
ZDHHC17	pDC
BATF	T cells
BTLA	T cells
CCL11	T cells
CCL17	T cells
CCL22	T cells
CCL3	T cells
CCL5	T cells
CCL7	T cells
CCR1	T cells
CCR3	T cells
CCR4	T cells
CCR8	T cells
CD1A	T cells
CD1B	T cells
CD1C	T cells
CD1D	T cells
CD1E	T cells
CD247	T cells
CD28	T cells
CD3D	T cells
CD3E	T cells
CD3G	T cells
CD69	T cells
CD8A	T cells
CXCR1	T cells
CXCR4	T cells
CXCR5	T cells
CXCR6	T cells
FGFBP2	T cells
FLT3	T cells
FOSL1	T cells
GRAP2	T cells
HLA-DRA	T cells
HLA-DRB1	T cells
HLA-DRB5	T cells
HRH2	T cells
IFNG	T cells
IL10	T cells
IL12B	T cells
IL12RB1	T cells
IL12RB2	T cells
IL18R1	T cells
IL18RAP	T cells
IL1B	T cells
IL21	T cells
IL21R	T cells
IL24	T cells
IL26	T cells
IL27	T cells
IL2RA	T cells
IL6	T cells
IL7	T cells
IRF4	T cells
IRF8	T cells
ITGAL	T cells
ITK	T cells
JAK2	T cells
JAK3	T cells
LAIR1	T cells
LAT	T cells
LAX1	T cells
LCK	T cells
LCP2	T cells
LILRA3	T cells
LILRA4	T cells
LILRB1	T cells
LILRB2	T cells
LILRB3	T cells
LILRB4	T cells
MS4A4A	T cells
NAPSB	T cells
NFATC1	T cells
NFKB2	T cells
P2RY14	T cells
PIK3CD	T cells
POU2F2	T cells
PRF1	T cells
RUNX3	T cells
SPI1	T cells
STAT1	T cells
STAT4	T cells
TNF	T cells
TPRG1	T cells
TSLP	T cells
UBASH3B	T cells
ZAP70	T cells
B3GAT1	TFH
BCL6	TFH
CCR7	TFH
CD200	TFH
CD83	TFH
CD84	TFH
CDK5R1	TFH
FGF2	TFH
GPR18	TFH
PDCD1	TFH
ACP5	TGD
C1orf54	TGD
CARD8	TGD
CCL18	TGD
CD209	TGD
CD33	TGD
CECR1	TGD
CLEC10A	TGD
CLEC4A	TGD
CSF1R	TGD
FCER1G	TGD
FCGR2A	TGD
FCGR2B	TGD
FCGR3B	TGD
FGF7	TGD
FGL2	TGD
FPR3	TGD
GM2A	TGD
GPNMB	TGD
HCK	TGD
HK3	TGD
LIPA	TGD
MARCO	TGD
MMP12	TGD
MNDA	TGD
MRC1	TGD
MS4A6A	TGD
NPL	TGD
PLA2G7	TGD
PLEK	TGD
RAB23	TGD
RNASE6	TGD
SDC2	TGD
SLAMF8	TGD
SLC15A3	TGD
SLC38A6	TGD
SLC7A7	TGD
SPP1	TGD
TFEC	TGD
TM6SF1	TGD
TNFSF8	TGD
TREM2	TGD
TRPV2	TGD
ADAM8	Th1
CCR5	Th1
CD151	Th1
CD48	Th1
CD52	Th1
CD53	Th1
CD6	Th1
CD68	Th1
CD7	Th1
CD96	Th1
CD97	Th1
EBI3	Th1
GPR84	Th1
HAVCR2	Th1
ICAM1	Th1
ICAM3	Th1
IGSF6	Th1
IL12A	Th1
IL7R	Th1
IRF1	Th1
ITGA4	Th1
ITGAM	Th1
ITGAX	Th1
ITGB2	Th1
ITGB4	Th1
ITGB7	Th1
LTA	Th1
LTB	Th1
METRNL	Th1
P2RX5	Th1
PTPRC	Th1
SPN	Th1
TBX21	Th1
TLR6	Th1
TNFRSF1A	Th1
TNFRSF9	Th1
TRAT1	Th1
ABP1	Th17
B4GALNT4	Th17
C2CD4A	Th17
C2CD4B	Th17
CA2	Th17
CCDC65	Th17
CEACAM3	Th17
CHRM3	Th17
DOC2B	Th17
F12	Th17
FURIN	Th17
GPR25	Th17
IL17A	Th17
IL17C	Th17
IL17F	Th17
IL17RC	Th17
IL17RE	Th17
IL23A	Th17
ILDR1	Th17
LONRF3	Th17
LTK	Th17
MOCOS	Th17
SH2D6	Th17
TNIP2	Th17
TRAF3IP2	Th17
YBX2	Th17
ASB2	Th2
CALD1	Th2
CCR2	Th2
CSRP2	Th2
DAPK1	Th2
DLC1	Th2
DNAJC12	Th2
DUSP6	Th2
GATA3	Th2
GNAI1	Th2
HTR2B	Th2
LAMP3	Th2
NRP2	Th2
OSBPL1A	Th2
PDE4B	Th2
PHLDA1	Th2
PLA2G4A	Th2
RAB27B	Th2
RBMS3	Th2
RNF125	Th2
SIGLEC10	Th2
SKAP1	Th2
SMAD2	Th2
TMPRSS3	Th2
UBASH3A	Th2
CCL19	Treg
CD34	Treg
CD72	Treg
CTLA4	Treg
FOXP3	Treg
GADD45B	Treg
GEM	Treg
IL1RL1	Treg
IL9R	Treg
MADCAM1	Treg
MYH10	Treg
NCF2	Treg
RCSD1	Treg
RYR1	Treg
SELE	Treg
SELP	Treg
SFRP1	Treg
SIT1	Treg
TIGIT	Treg
TLR10	Treg
TLR2	Treg
TLR7	Treg
TLR8	Treg
TRAF1	Treg
WIPF1	Treg
TGFB1	Treg
ADORA3	MDSC
AG2	MDSC
ARG1	MDSC
BIN2	MDSC
C1orf162	MDSC
CAPS	MDSC
CD117	MDSC
CD11B	MDSC
CD11C	MDSC
CD124	MDSC
CD14	MDSC
CD15	MDSC
CD163L1	MDSC
CD1D1	MDSC
CD21	MDSC
CD23	MDSC
CD274	MDSC
CD31	MDSC
CD35	MDSC
CD40	MDSC
CD43	MDSC
CD44	MDSC
CD66B	MDSC
COX2	MDSC
CR2	MDSC
CTR9	MDSC
EBP	MDSC
FAM48A	MDSC
FAM70B	MDSC
FCER2	MDSC
FCGRT	MDSC
FERMT3	MDSC
FLOT1	MDSC
FLT1	MDSC
GIMAP7	MDSC
GLI4	MDSC
GNA15	MDSC
GPR34	MDSC
GPSM3	MDSC
HLA-DR	MDSC
IDO	MDSC
IKZF1	MDSC
IL12	MDSC
IL13	MDSC
IL18BP	MDSC
IL1R	MDSC
IL4RA	MDSC
INPP5D	MDSC
ITGA3	MDSC
KDR	MDSC
KRIT1	MDSC
LGALS3	MDSC
MGAT4A	MDSC
NAIP	MDSC
NEK3	MDSC
NFSF13	MDSC
NOG	MDSC
PARVG	MDSC
PDRG1	MDSC
PECAM1	MDSC
PIK3R5	MDSC
PPP1R2P4	MDSC
PSAP	MDSC
PTGES2	MDSC
PTPRE	MDSC
RNASE1	MDSC
RP11	MDSC
S100A8	MDSC
S100A9	MDSC
SELPLG	MDSC
SLA	MDSC
SLC36A1	MDSC
SLC44A1	MDSC
ST8SIA4	MDSC
STAT3	MDSC
STAT6	MDSC
TBXAS1	MDSC
TFGFB1	MDSC
TFGFB2	MDSC
TFGFB3	MDSC
TFGFB5	MDSC
TFRC	MDSC
TGFB2	MDSC
TPP1	MDSC
VTCN1	MDSC
