# Supplementary material for: Comprehensive Pan-Cancer Analyses of Immunogenic Cell Death as a Biomarker in Predicting Prognosis and Therapeutic Response
Source: Cancers (Basel). 2022 Dec 1;14(23):5952. doi: 10.3390/cancers14235952 (PMC9736000; doi:10.3390/cancers14235952)
Supplement: Supplementary file 1 [file cancers-14-05952-s001.zip › Table S4.xlsx]

## Sheet: Sequences of siRNAs
siRNA	Primer	Sequence 5’→3’
Negative control	Forward	UUCUCCGAACGUGUCACGUTT
	Reverse	ACGUGACACGUUCGGAGAATT
IGF2BP3-1	Forward	GGGAAGAAUUUAUGGAAAATT
	Reverse	UUUUCCAUAAAUUCUUCCCTT
IGF2BP3-2	Forward	UAAGGAAGCUCAAGAUAUATT
	Reverse	UAUAUCUUGAGCUUCCUUATT
IGF2BP3-3	Forward	UGGCAGAGUUAUUGGAAAATT
	Reverse	UUUUCCAAUAACUCUGCCATT

## Sheet: q-RT-PCR primers
Gene	Primer	Sequence
GAPDH	Forward	GACCACAGTCCATGCCATCA
	Reverse	GTCAAAGGTGGAGGAGTGGG
IGF2BP3	Forward	CCTGGTGAAGACTGGCTACG
	Reverse	ATCCAGCACCTCCCACTGTA
HMGB1	Forward	TCAAAGGAGAACATCCTGGCCTGT
	Reverse	CTGCTTGTCATCTGCAGCAGTGTT
ANXA1	Forward	GGTGTGAATGAAGACTTGGCTGA
	Reverse	GTTTCATCCAGGATGGCTTGGCA
