# Supplementary material for: Comprehensive Pan-Cancer Analyses of Immunogenic Cell Death as a Biomarker in Predicting Prognosis and Therapeutic Response
Source: Cancers (Basel). 2022 Dec 1;14(23):5952. doi: 10.3390/cancers14235952 (PMC9736000; doi:10.3390/cancers14235952)
Supplement: Supplementary file 1 [file cancers-14-05952-s001.zip › Table S5.xlsx]

## Sheet: Sheet1
# Rank	Motif id	AUC	NES	ClusterCode	Transcription factor	Target genes
1	homer-M00124	0.102324	5.16991	M1	NFYB,NFYA,NFYC,POLE3	FOXP3,HMGB1,EIF2AK3,CALR
2	yetfasco-699	0.10101	5.09272	M1	NFYB,POLE3	FOXP3,EIF2AK3,CALR,HMGB1
3	homer-M01861	0.099923	5.02884	M1		FOXP3,EIF2AK3,CALR,HMGB1
4	tfdimers-MD00377	0.0998777	5.02618	M2	PBX1,POU1F1,TLX2	HMGB1,IL6,TNF,CD4
5	jaspar-PF0172.1	0.0986094	4.95165	M3		IL17RA,IL6,EIF2AK3,LY96,P2RX7,NLRP3,CD8A,IL1B
6	transfac_pro-M03805	0.0978847	4.90906	M1	YBX1,NFYA,NFYB	EIF2AK3,CD4,CALR,HMGB1,P2RX7
7	jaspar-MA0316.1	0.0969335	4.85316	M1	NFYC,POLE4,NFYA,NFYB	EIF2AK3,HMGB1,CALR,FOXP3
8	tfdimers-MD00398	0.0961181	4.80525	M4	ETS1,PURA,SPI1,NR3C1,STAT1,E2F6,EP300,SPIB,FLI1,ELK4,ERG,ETV7,ELF2,ERF,ETS2,ELF1,ELK1,IRF4,ETV4,GATA4,GATA1,GATA2,GATA3,GATA6,GATA5,ELF4,TCF4,STAT6,GABPB1,ETV6,TBP,E2F1	TLR4,IL10,CXCR3,NT5E,IFNGR1,CD4,FOXP3,IL17RA,IL17A,CD8A,CASP8,HMGB1
9	transfac_pro-M02025	0.0959822	4.79726	M2	MEF2C,MEF2A	TNF,HMGB1,CD4
10	elemento-TTGTTTAC	0.0947592	4.72539	M5	FOXO4,FOXO1,FOXO3,FOXF2,FOXO6,FOXC2,HLTF,FOXK1	PIK3CA,ATG5,HSP90AA1,HMGB1,CD4,EIF2AK3
11	factorbook-NFY	0.093491	4.65086	M1	NFYA,NFYB,NFYC,YBX1,POLE3,POLE4	EIF2AK3,HMGB1,FOXP3,CALR
12	yetfasco-1537	0.0929474	4.61892	M1	NFYC,POLE4,NFYA,NFYB	EIF2AK3,HMGB1,CALR,FOXP3
13	transfac_pro-M01888	0.0926303	4.60029	M4	SMAD3,SMAD5,SMAD7,SMAD4,SMAD9,SMAD1,SMAD6,SMAD2	FOXP3,CD4,IL17RA,TNF
14	yetfasco-65	0.0897767	4.4326	M2		TNF,CD4,HMGB1,EIF2AK3
15	elemento-ATGGCCG	0.0884631	4.3554	M6		CALR,CD4,HMGB1,ATG5,IFNG,IFNA1,FOXP3,IL6,PIK3CA,CXCR3,IL1R1
16	jaspar-CN0119.1	0.0877837	4.31548	M7		FOXP3,IL1B,IL17A,NT5E
17	transfac_public-M00287	0.0867419	4.25425	M1	NFYA,NFYB,NFYC,YBX1,POLE3,POLE4	EIF2AK3,CALR,HMGB1,FOXP3
18	taipale-NCCGCCATNNT-YY2-full	0.0863795	4.23296	M6	YY2,YY1,ZFP42	HMGB1,CALR,FOXP3,CD4,ATG5
19	elemento-ATGACGTC	0.0860171	4.21167	M8	JDP2,BATF3,ATF7,XBP1	IL6,ATG5,FOXP3,P2RX7
20	stark-GGTNTAAAW	0.0857	4.19303	M9		CALR,HMGB1,ATG5,PIK3CA,FOXP3
21	homer-M00169	0.085383	4.1744	M10	RUNX2,RUNX1,RUNX3,CBFB,RUNX1T1	CD4,FOXP3,IFNG,IL17A
22	flyfactorsurvey-Atf-2_SANGER_5_FBgn0050420	0.0841147	4.09987	M8	NPDC1,JDP2,XBP1,JUND,JUN,JUNB,ATF7,BATF3,CREB3,ATF1	ATG5,NLRP3,CD4,P2RX7,IL17A
23	homer-M00295	0.0839788	4.09189	M2	FOXC2,FOXJ2,FOXA1,FOXA2,FOXA3,FOXL1,FOXI1,HLTF,FOXJ1,FOXF1,FOXF2,FOXD3,FOXH1,RRN3,PGR,NR3C1,NF1,FOXD2,HMGA1,FOXO1,HMGA2,FOXL2	TNF,HMGB1,PIK3CA
24	jaspar-MF0005.1	0.0837976	4.08124	M2	FOXC2,FOXJ2,FOXA1,FOXA2,FOXA3,FOXL1,FOXI1,HLTF,FOXF1,FOXD3,RRN3,FOXJ1,FOXF2,FOXH1,NR3C1,PGR,NF1,FOXD2,FOXO1,HMGA1,HMGA2,FOXL2	TNF,HMGB1,PIK3CA
25	taipale-GTAAACAW-FOXO3-full	0.0835711	4.06793	M5	FOXO3,FOXC2,FOXO1,FOXF2,FOXD1,FOXD2,HLTF,FOXO4,FOXO6,FOXA1,FOXA2,FOXJ2,FOXI1,FOXK1	PIK3CA,ATG5,HSP90AA1,EIF2AK3,HMGB1
26	transfac_public-M00254	0.0833447	4.05462	M1	NFYC,NFYA,NFYB,YBX1,POLE3	FOXP3,CALR,EIF2AK3
27	transfac_pro-M00775	0.0831635	4.04397	M1	NFYB,NFYC,NFYA,HNF1B,HNF1A,YBX1,POLE3	EIF2AK3,CALR,FOXP3,HMGB1
28	transfac_public-M00422	0.0830729	4.03865	M2	FOXJ2,FOXA1,FOXA3,FOXA2,NR3C1,PGR,FOXI1,FOXJ1,FOXH1,FOXD3,FOXF2,RRN3,FOXF1,SMAD1,FOXL1,FOXC2,CEBPD,CEBPB,CEBPG,CEBPA,CEBPE,FOXC1,FOXP3,HLTF,FOXQ1,IRF1,FOXO1,FOXS1,FOXI2,FOXK1	TNF,PIK3CA,CD4,HMGB1
29	transfac_pro-M02086	0.0828917	4.028	M2	CDX1	PIK3CA,TNF,CD4,HMGB1
