# Supplementary material for: Comprehensive Pan-Cancer Analyses of Immunogenic Cell Death as a Biomarker in Predicting Prognosis and Therapeutic Response
Source: Cancers (Basel). 2022 Dec 1;14(23):5952. doi: 10.3390/cancers14235952 (PMC9736000; doi:10.3390/cancers14235952)
Supplement: Supplementary file 1 [file cancers-14-05952-s001.zip › Table S6.xlsx]

## Sheet: Table S6
	Pathway	Database	pvalue	fdr_bh
1801	reactome_Interaction_With_The_Zona_Pellucida_Main_Pathway	Reactome 1.3	2.51e-96	4.4e-96
1402	reactome_ABC_family_proteins_mediated_transport_Main_Pathway	Reactome 1.3	7.89e-13	1.38e-12
1440	reactome_Activation_of_Matrix_Metalloproteinases_Main_Pathway	Reactome 1.3	8.16e-08	1.43e-07
1611	reactome_Degradation_of_the_extracellular_matrix_Main_Pathway	Reactome 1.3	5.22e-07	9.13e-07
1574	reactome_Collagen_degradation_Main_Pathway	Reactome 1.3	7.89e-07	1.38e-06
1836	reactome_MHC_class_II_antigen_presentation_Main_Pathway	Reactome 1.3	1.47e-06	2.57e-06
149	KEGG_MicroRNAs_in_cancer_Main_Pathway	KEGG Adjusted 1.4	1.55e-06	2.7e-06
1589	reactome_Cross_presentation_of_soluble_exogenous_antigens_endosomes__Main_Pathway	Reactome 1.3	5.55e-06	9.67e-06
2294	reactome_Vitamin_B2_riboflavin_metabolism_Main_Pathway	Reactome 1.3	5.83e-06	1.01e-05
0	KEGG_ABC_transporters_Main_Pathway	KEGG Adjusted 1.4	5.85e-06	1.02e-05
1325	biocarta_role_of_parkin_in_ubiquitin_proteasomal_Main_Pathway	Biocarta 1.2	6.31e-06	1.09e-05
1890	reactome_Negative_regulators_of_RIG_I_MDA5_signaling_Main_Pathway	Reactome 1.3	6.31e-06	1.09e-05
1994	reactome_RIG_I_MDA5_mediated_induction_of_IFN_alpha_beta_pathways_Main_Pathway	Reactome 1.3	6.31e-06	1.09e-05
23	KEGG_Asthma_Main_Pathway	KEGG Adjusted 1.4	9.05e-06	1.57e-05
382	NCI_BMP_receptor_signaling_Main_Pathway	NCI 1.2	9.2e-06	1.59e-05
1207	biocarta_inhibition_of_matrix_metalloproteinases_Main_Pathway	Biocarta 1.2	1.35e-05	2.34e-05
1208	biocarta_inhibition_of_matrix_metalloproteinases_Pathway_(Pathway_degradation_of_RECK_TIMP4_MMP14_TIMP2_TIMP1_TIMP3)	Biocarta 1.2	1.35e-05	2.34e-05
1883	reactome_Nectin_Necl_trans_heterodimerization_Main_Pathway	Reactome 1.3	1.54e-05	2.66e-05
2128	reactome_Signaling_by_BMP_Main_Pathway	Reactome 1.3	1.82e-05	3.14e-05
207	KEGG_Proteoglycans_in_cancer_Main_Pathway	KEGG Adjusted 1.4	1.84e-05	3.17e-05
1081	biocarta_alternative_complement_Main_Pathway	Biocarta 1.2	2.67e-05	4.6e-05
137	KEGG_Long_term_depression_Main_Pathway	KEGG Adjusted 1.4	2.71e-05	4.67e-05
1899	reactome_Non_integrin_membrane_ECM_interactions_Main_Pathway	Reactome 1.3	3e-05	5.17e-05
2310	reactome_Xenobiotics_Main_Pathway	Reactome 1.3	3.82e-05	6.58e-05
512	NCI_Endogenous_TLR_signaling_Pathway_(cytokine_production_involved_in_inflammatory_response)	NCI 1.2	4.17e-05	7.17e-05
409	NCI_CXCR3_mediated_signaling_events_Pathway_(cAMP_biosynthetic_process)	NCI 1.2	5.02e-05	8.62e-05
413	NCI_CXCR3_mediated_signaling_events_Pathway_(regulation_of_stress_fiber_assembly)	NCI 1.2	5.02e-05	8.62e-05
1401	reactome_ABCA_transporters_in_lipid_homeostasis_Main_Pathway	Reactome 1.3	5.96e-05	0.000102398
93	KEGG_Glioma_Main_Pathway	KEGG Adjusted 1.4	7.45e-05	0.000127831
1480	reactome_Anchoring_fibril_formation_Main_Pathway	Reactome 1.3	7.51e-05	0.000128801
1297	biocarta_regulators_of_bone_mineralization_Main_Pathway	Biocarta 1.2	9.24e-05	0.00015822
28	KEGG_Basal_cell_carcinoma_Main_Pathway	KEGG Adjusted 1.4	0.000116097	0.000198143
114	KEGG_Hedgehog_signaling_Main_Pathway	KEGG Adjusted 1.4	0.000116097	0.000198143
606	NCI_Hedgehog_signaling_events_mediated_by_Gli_proteins_Main_Pathway	NCI 1.2	0.000116097	0.000198143
607	NCI_Hedgehog_signaling_events_mediated_by_Gli_proteins_Pathway_(embryonic_limb_morphogenesis)	NCI 1.2	0.000116097	0.000198143
608	NCI_Hedgehog_signaling_events_mediated_by_Gli_proteins_Pathway_(forebrain_development)	NCI 1.2	0.000116097	0.000198143
407	NCI_CXCR3_mediated_signaling_events_Main_Pathway	NCI 1.2	0.000119884	0.000203863
408	NCI_CXCR3_mediated_signaling_events_Pathway_(actin_polymerization_or_depolymerization)	NCI 1.2	0.000119884	0.000203863
410	NCI_CXCR3_mediated_signaling_events_Pathway_(cell_adhesion)	NCI 1.2	0.000119884	0.000203863
411	NCI_CXCR3_mediated_signaling_events_Pathway_(cell_proliferation)	NCI 1.2	0.000119884	0.000203863
412	NCI_CXCR3_mediated_signaling_events_Pathway_(chemotaxis)	NCI 1.2	0.000119884	0.000203863
2190	reactome_Synthesis_of_bile_acids_and_bile_salts_via_27_hydroxycholesterol_Main_Pathway	Reactome 1.3	0.000126165	0.000214234
2191	reactome_Synthesis_of_bile_acids_and_bile_salts_via_7alpha_hydroxycholesterol_Main_Pathway	Reactome 1.3	0.000126165	0.000214234
170	KEGG_Oocyte_meiosis_Main_Pathway	KEGG Adjusted 1.4	0.000128872	0.000216946
953	NCI_Stabilization_and_expansion_of_the_E_cadherin_adherens_junction_Main_Pathway	NCI 1.2	0.000128872	0.000216946
1183	biocarta_igf_1_signaling_Main_Pathway	Biocarta 1.2	0.000128872	0.000216946
1237	biocarta_multiple_antiapoptotic_pathways_from_igf_1r_signaling_lead_to_bad_phosphorylation_Main_Pathway	Biocarta 1.2	0.000128872	0.000216946
1238	biocarta_multiple_antiapoptotic_pathways_from_igf_1r_signaling_lead_to_bad_phosphorylation_Pathway_(apoptosis)	Biocarta 1.2	0.000128872	0.000216946
1239	biocarta_multiple_antiapoptotic_pathways_from_igf_1r_signaling_lead_to_bad_phosphorylation_Pathway_(cell_growth_and_or_maintenance)	Biocarta 1.2	0.000128872	0.000216946
1337	biocarta_skeletal_muscle_hypertrophy_is_regulated_via_akt_mtor_Main_Pathway	Biocarta 1.2	0.000128872	0.000216946
1362	biocarta_the_igf_1_receptor_and_longevity_Main_Pathway	Biocarta 1.2	0.000128872	0.000216946
1365	biocarta_the_igf_1_receptor_and_longevity_Pathway_(superoxide_release)	Biocarta 1.2	0.000128872	0.000216946
1782	reactome_IRS_related_events_triggered_by_IGF1R_Main_Pathway	Reactome 1.3	0.000128872	0.000216946
2094	reactome_SHC_related_events_triggered_by_IGF1R_Main_Pathway	Reactome 1.3	0.000128872	0.000216946
2143	reactome_Signaling_by_Type_1_Insulin_like_Growth_Factor_1_Receptor_IGF1R__Main_Pathway	Reactome 1.3	0.000128872	0.000216946
2241	reactome_Toxicity_of_botulinum_toxin_type_D_BoNT_D__Main_Pathway	Reactome 1.3	0.000130529	0.00021942
2243	reactome_Toxicity_of_botulinum_toxin_type_F_BoNT_F__Main_Pathway	Reactome 1.3	0.000130529	0.00021942
2339	reactome_regulation_of_FZD_by_ubiquitination_Main_Pathway	Reactome 1.3	0.000150199	0.000252304
334	NCI_Arf6_downstream_Main_Pathway	NCI 1.2	0.000162555	0.000271503
337	NCI_Arf6_downstream_Pathway_(cortical_actin_cytoskeleton_organization)	NCI 1.2	0.000162555	0.000271503
338	NCI_Arf6_downstream_Pathway_(lamellipodium_assembly)	NCI 1.2	0.000162555	0.000271503
485	NCI_EPHA2_forward_signaling_Main_Pathway	NCI 1.2	0.000162555	0.000271503
504	NCI_E_cadherin_signaling_in_the_nascent_adherens_junction_Pathway_(actin_cytoskeleton_organization)	NCI 1.2	0.000162555	0.000271503
706	NCI_LPA_receptor_mediated_events_Pathway_(contractile_ring_contraction_involved_in_cytokinesis)	NCI 1.2	0.000162555	0.000271503
746	NCI_Neurotrophic_factor_mediated_Trk_receptor_signaling_Pathway_(Schwann_cell_development)	NCI 1.2	0.000162555	0.000271503
748	NCI_Neurotrophic_factor_mediated_Trk_receptor_signaling_Pathway_(neuron_projection_morphogenesis)	NCI 1.2	0.000162555	0.000271503
5	KEGG_Adrenergic_signaling_in_cardiomyocytes_Main_Pathway	KEGG Adjusted 1.4	0.000169044	0.000282141
1530	reactome_CHL1_interactions_Main_Pathway	Reactome 1.3	0.000179255	0.000298971
112	KEGG_HIF_1_signaling_Main_Pathway	KEGG Adjusted 1.4	0.000189153	0.000315255
1770	reactome_Hyaluronan_uptake_and_degradation_Main_Pathway	Reactome 1.3	0.000193445	0.000322179
841	NCI_Reelin_signaling_Main_Pathway	NCI 1.2	0.000203663	0.000338477
842	NCI_Reelin_signaling_Pathway_(long_term_memory)	NCI 1.2	0.000203663	0.000338477
843	NCI_Reelin_signaling_Pathway_(neuron_migration)	NCI 1.2	0.000203663	0.000338477
1790	reactome_Initial_triggering_of_complement_Main_Pathway	Reactome 1.3	0.000204921	0.000340325
1000	NCI_Urokinase_type_plasminogen_activator_uPA_and_uPAR_mediated_signaling_Main_Pathway	NCI 1.2	0.00021878	0.000363085
2238	reactome_Toxicity_of_botulinum_toxin_type_A_BoNT_A__Main_Pathway	Reactome 1.3	0.000236936	0.000392661
2242	reactome_Toxicity_of_botulinum_toxin_type_E_BoNT_E__Main_Pathway	Reactome 1.3	0.000236936	0.000392661
1877	reactome_NRAGE_signals_death_through_JNK_Main_Pathway	Reactome 1.3	0.00024336	0.000403021
820	NCI_Plexin_D1_Signaling_Pathway_(focal_adhesion_assembly)	NCI 1.2	0.000255602	0.000422401
821	NCI_Plexin_D1_Signaling_Pathway_(receptor_recycling)	NCI 1.2	0.000255602	0.000422401
822	NCI_Plexin_D1_Signaling_Pathway_(regulation_of_synapse_organization)	NCI 1.2	0.000255602	0.000422401
2189	reactome_Synthesis_of_bile_acids_and_bile_salts_via_24_hydroxycholesterol_Main_Pathway	Reactome 1.3	0.000276033	0.000455843
2344	reactome_temp_Post-translational_modification_synthesis_of_GPI-anchored_proteins	Reactome 1.3	0.000276322	0.000455999
1283	biocarta_regulation_of_bad_phosphorylation_Main_Pathway	Biocarta 1.2	0.000277003	0.000456802
154	KEGG_NF_kappa_B_signaling_Main_Pathway	KEGG Adjusted 1.4	0.000291739	0.000480765
520	NCI_Endogenous_TLR_signaling_Pathway_(regulation_of_interleukin_6_production)	NCI 1.2	0.00029618	0.000487398
521	NCI_Endogenous_TLR_signaling_Pathway_(regulation_of_tumor_necrosis_factor_production)	NCI 1.2	0.00029618	0.000487398
1091	biocarta_attenuation_of_gpcr_signaling_Main_Pathway	Biocarta 1.2	0.000307424	0.000504838
1246	biocarta_nitric_oxide_signaling_Main_Pathway	Biocarta 1.2	0.000307424	0.000504838
2300	reactome_Voltage_gated_Potassium_channels_Main_Pathway	Reactome 1.3	0.000307283	0.000504838
1564	reactome_Classical_antibody_mediated_complement_activation_Main_Pathway	Reactome 1.3	0.000320276	0.000525575
1896	reactome_Nicotinate_metabolism_Main_Pathway	Reactome 1.3	0.000336306	0.000551495
1925	reactome_PD_1_signaling_Main_Pathway	Reactome 1.3	0.000345967	0.000566942
942	NCI_Signaling_events_mediated_by_the_Hedgehog_family_Pathway_(receptor_mediated_endocytosis)	NCI 1.2	0.000348393	0.000570518
2272	reactome_Tryptophan_catabolism_Main_Pathway	Reactome 1.3	0.000374471	0.000612795
817	NCI_Plexin_D1_Signaling_Main_Pathway	NCI 1.2	0.000419437	0.000685899
9	KEGG_Aldosterone_regulated_sodium_reabsorption_Main_Pathway	KEGG Adjusted 1.4	0.000518064	0.000846593
2138	reactome_Signaling_by_NODAL_Main_Pathway	Reactome 1.3	0.000519158	0.000847789
1185	biocarta_il22_soluble_receptor_signaling_Main_Pathway	Biocarta 1.2	0.000527399	0.000860647
263	KEGG_Tryptophan_metabolism_Main_Pathway	KEGG Adjusted 1.4	0.000538281	0.000877795
848	NCI_Regulation_of_RAC1_activity_Main_Pathway	NCI 1.2	0.00054159	0.000882578
2299	reactome_Vitamins_Main_Pathway	Reactome 1.3	0.000610699	0.000994506
285	KEGG_mRNA_surveillance_Main_Pathway	KEGG Adjusted 1.4	0.000611988	0.000995914
2256	reactome_Translocation_of_ZAP_70_to_Immunological_synapse_Main_Pathway	Reactome 1.3	0.000651595	0.00105963
246	KEGG_Synaptic_vesicle_cycle_Main_Pathway	KEGG Adjusted 1.4	0.000677532	0.00109498
509	NCI_Effects_of_Botulinum_toxin_Main_Pathway	NCI 1.2	0.000677532	0.00109498
1427	reactome_Acetylcholine_Neurotransmitter_Release_Cycle_Main_Pathway	Reactome 1.3	0.000677532	0.00109498
1621	reactome_Dopamine_Neurotransmitter_Release_Cycle_Main_Pathway	Reactome 1.3	0.000677532	0.00109498
1711	reactome_GABA_synthesis_release_reuptake_and_degradation_Main_Pathway	Reactome 1.3	0.000677532	0.00109498
1739	reactome_Glutamate_Neurotransmitter_Release_Cycle_Main_Pathway	Reactome 1.3	0.000677532	0.00109498
1903	reactome_Norepinephrine_Neurotransmitter_Release_Cycle_Main_Pathway	Reactome 1.3	0.000677532	0.00109498
2120	reactome_Serotonin_Neurotransmitter_Release_Cycle_Main_Pathway	Reactome 1.3	0.000677532	0.00109498
2240	reactome_Toxicity_of_botulinum_toxin_type_C_BoNT_C__Main_Pathway	Reactome 1.3	0.000677532	0.00109498
1666	reactome_FCGR_activation_Main_Pathway	Reactome 1.3	0.000706388	0.00114083
764	NCI_PAR1_mediated_thrombin_signaling_events_Main_Pathway	NCI 1.2	0.00077223	0.0012463
141	KEGG_Lysosome_Main_Pathway	KEGG Adjusted 1.4	0.000826178	0.00133245
1681	reactome_Fatty_acids_Main_Pathway	Reactome 1.3	0.000835917	0.00134723
1369	biocarta_thrombin_signaling_and_protease_activated_receptors_Main_Pathway	Biocarta 1.2	0.000840565	0.00135379
663	NCI_IL6_mediated_signaling_events_Main_Pathway	NCI 1.2	0.000850264	0.00136754
2054	reactome_Regulation_of_signaling_by_CBL_Main_Pathway	Reactome 1.3	0.000850264	0.00136754
266	KEGG_Type_I_diabetes_mellitus_Main_Pathway	KEGG Adjusted 1.4	0.0009444	0.0015179
1436	reactome_Activation_of_C3_and_C5_Main_Pathway	Reactome 1.3	0.000966072	0.00155167
1058	NCI_p75_NTR_mediated_signaling_Main_Pathway	NCI 1.2	0.000995677	0.00159813
119	KEGG_Hippo_signaling_Main_Pathway	KEGG Adjusted 1.4	0.00103891	0.00166638
1634	reactome_EGFR_Transactivation_by_Gastrin_Main_Pathway	Reactome 1.3	0.00105302	0.00168786
1336	biocarta_signaling_pathway_from_g_protein_families_Main_Pathway	Biocarta 1.2	0.00115487	0.00184984
1429	reactome_Activated_NOTCH1_Transmits_Signal_to_the_Nucleus_Main_Pathway	Reactome 1.3	0.00116551	0.00186561
1590	reactome_Crosslinking_of_collagen_fibrils_Main_Pathway	Reactome 1.3	0.00121593	0.00194499
231	KEGG_Salmonella_infection_Main_Pathway	KEGG Adjusted 1.4	0.00123616	0.001976
260	KEGG_Toll_like_receptor_signaling_Main_Pathway	KEGG Adjusted 1.4	0.00124075	0.00198198
688	NCI_Internalization_of_ErbB1_Main_Pathway	NCI 1.2	0.00124494	0.00198733
198	KEGG_Prion_diseases_Main_Pathway	KEGG Adjusted 1.4	0.00125161	0.00199662
1855	reactome_Molecules_associated_with_elastic_fibres_Main_Pathway	Reactome 1.3	0.00130073	0.00207357
1731	reactome_Generation_of_second_messenger_molecules_Main_Pathway	Reactome 1.3	0.00133543	0.00212743
195	KEGG_Porphyrin_and_chlorophyll_metabolism_Main_Pathway	KEGG Adjusted 1.4	0.00135355	0.00215338
1814	reactome_Iron_uptake_and_transport_Main_Pathway	Reactome 1.3	0.00135355	0.00215338
1952	reactome_Phosphorylation_of_CD3_and_TCR_zeta_chains_Main_Pathway	Reactome 1.3	0.00140558	0.00223463
302	NCI_ATR_signaling_Main_Pathway	NCI 1.2	0.00143295	0.00227045
303	NCI_ATR_signaling_Pathway_(Pathway_negative_regulation_of_transcription_during_mitosis_via_CHEK1)	NCI 1.2	0.00143295	0.00227045
304	NCI_ATR_signaling_Pathway_(regulation_of_double_strand_break_repair_via_homologous_recombination)	NCI 1.2	0.00143295	0.00227045
305	NCI_ATR_signaling_Pathway_(response_to_G2_M_transition_DNA_damage_checkpoint_signal)	NCI 1.2	0.00143295	0.00227045
514	NCI_Endogenous_TLR_signaling_Pathway_(regulation_of_cell_adhesion)	NCI 1.2	0.0014295	0.00227045
152	KEGG_Morphine_addiction_Main_Pathway	KEGG Adjusted 1.4	0.00150233	0.00237878
282	KEGG_beta_Alanine_metabolism_Main_Pathway	KEGG Adjusted 1.4	0.00151753	0.00240122
1858	reactome_Muscarinic_acetylcholine_receptors_Main_Pathway	Reactome 1.3	0.00155316	0.00245546
2044	reactome_Regulation_of_actin_dynamics_for_phagocytic_cup_formation_Main_Pathway	Reactome 1.3	0.0015539	0.00245546
2081	reactome_Role_of_phospholipids_in_phagocytosis_Main_Pathway	Reactome 1.3	0.00157012	0.00247941
87	KEGG_FoxO_signaling_Main_Pathway	KEGG Adjusted 1.4	0.00164388	0.00258198
132	KEGG_Legionellosis_Main_Pathway	KEGG Adjusted 1.4	0.00164123	0.00258198
1667	reactome_FGFR1b_ligand_binding_and_activation_Main_Pathway	Reactome 1.3	0.00164318	0.00258198
1675	reactome_FRS2_mediated_cascade_Main_Pathway	Reactome 1.3	0.00164318	0.00258198
1888	reactome_Negative_regulation_of_FGFR_signaling_Main_Pathway	Reactome 1.3	0.00164318	0.00258198
1932	reactome_PI_3K_cascade_Main_Pathway	Reactome 1.3	0.00164318	0.00258198
1951	reactome_Phospholipase_C_mediated_cascade_Main_Pathway	Reactome 1.3	0.00164318	0.00258198
2092	reactome_SHC_mediated_cascade_Main_Pathway	Reactome 1.3	0.00164318	0.00258198
46	KEGG_Chemokine_signaling_Main_Pathway	KEGG Adjusted 1.4	0.00170321	0.00267338
1886	reactome_Nef_and_signal_transduction_Main_Pathway	Reactome 1.3	0.00172762	0.00270987
2304	reactome_WNT5A_dependent_internalization_of_FZD2_FZD5_and_ROR2_Main_Pathway	Reactome 1.3	0.00179547	0.00281443
1071	biocarta_agrin_in_postsynaptic_differentiation_Main_Pathway	Biocarta 1.2	0.00187868	0.00294288
1719	reactome_G_alpha_i_signalling_events_Main_Pathway	Reactome 1.3	0.00189567	0.00296752
1848	reactome_Miscellaneous_substrates_Main_Pathway	Reactome 1.3	0.00195687	0.00306128
1627	reactome_Downstream_TCR_signaling_Main_Pathway	Reactome 1.3	0.00205082	0.00320611
1320	biocarta_role_of_mal_in_rho_mediated_activation_of_srf_Main_Pathway	Biocarta 1.2	0.00206097	0.00321984
3	KEGG_Adherens_junction_Main_Pathway	KEGG Adjusted 1.4	0.00210954	0.00329351
128	KEGG_Insulin_secretion_Main_Pathway	KEGG Adjusted 1.4	0.00216746	0.0033817
969	NCI_Syndecan_2_mediated_signaling_events_Main_Pathway	NCI 1.2	0.00221138	0.00344793
262	KEGG_Transcriptional_misregulation_in_cancer_Main_Pathway	KEGG Adjusted 1.4	0.00221451	0.00345051
284	KEGG_cGMP_PKG_signaling_Main_Pathway	KEGG Adjusted 1.4	0.00226293	0.00352361
202	KEGG_Prostate_cancer_Main_Pathway	KEGG Adjusted 1.4	0.00227057	0.00353318
213	KEGG_RNA_degradation_Main_Pathway	KEGG Adjusted 1.4	0.00236268	0.00367406
2168	reactome_Synthesis_of_5_eicosatetraenoic_acids_Main_Pathway	Reactome 1.3	0.00247711	0.0038469
2176	reactome_Synthesis_of_Lipoxins_LX__Main_Pathway	Reactome 1.3	0.00247711	0.0038469
19	KEGG_Arachidonic_acid_metabolism_Main_Pathway	KEGG Adjusted 1.4	0.00249542	0.00387277
6	KEGG_African_trypanosomiasis_Main_Pathway	KEGG Adjusted 1.4	0.00254779	0.00387708
70	KEGG_Endocrine_and_other_factor_regulated_calcium_reabsorption_Main_Pathway	KEGG Adjusted 1.4	0.00254779	0.00387708
138	KEGG_Long_term_potentiation_Main_Pathway	KEGG Adjusted 1.4	0.00254779	0.00387708
345	NCI_Arf6_signaling_events_Main_Pathway	NCI 1.2	0.00254738	0.00387708
523	NCI_Endothelins_Main_Pathway	NCI 1.2	0.00254779	0.00387708
671	NCI_IL8_and_CXCR1_mediated_signaling_events_Pathway_(chemotaxis)	NCI 1.2	0.00254779	0.00387708
675	NCI_IL8_and_CXCR2_mediated_signaling_events_Pathway_(regulation_of_cell_migration)	NCI 1.2	0.00254779	0.00387708
765	NCI_PAR1_mediated_thrombin_signaling_events_Pathway_(MAPKKK_cascade)	NCI 1.2	0.00254779	0.00387708
770	NCI_PAR1_mediated_thrombin_signaling_events_Pathway_(platelet_aggregation)	NCI 1.2	0.00254779	0.00387708
924	NCI_Signaling_events_mediated_by_VEGFR1_and_VEGFR2_Main_Pathway	NCI 1.2	0.00254779	0.00387708
927	NCI_Signaling_events_mediated_by_VEGFR1_and_VEGFR2_Pathway_(cell_proliferation)	NCI 1.2	0.00254779	0.00387708
989	NCI_Thromboxane_A2_receptor_signaling_Pathway_(cAMP_biosynthetic_process)	NCI 1.2	0.00254779	0.00387708
990	NCI_Thromboxane_A2_receptor_signaling_Pathway_(chemotaxis)	NCI 1.2	0.00254779	0.00387708
991	NCI_Thromboxane_A2_receptor_signaling_Pathway_(muscle_contraction)	NCI 1.2	0.00254779	0.00387708
1069	biocarta_activation_of_pkc_through_g_protein_coupled_receptors_Pathway_(secretion)	Biocarta 1.2	0.00254779	0.00387708
1085	biocarta_aspirin_blocks_signaling_pathway_involved_in_platelet_activation_Main_Pathway	Biocarta 1.2	0.00254779	0.00387708
1100	biocarta_bioactive_peptide_induced_signaling_Main_Pathway	Biocarta 1.2	0.00254779	0.00387708
1143	biocarta_egf_signaling_Main_Pathway	Biocarta 1.2	0.00254779	0.00387708
1160	biocarta_g_secretase_mediated_erbb4_signaling_Main_Pathway	Biocarta 1.2	0.00254779	0.00387708
1167	biocarta_growth_hormone_signaling_Main_Pathway	Biocarta 1.2	0.00254779	0.00387708
1257	biocarta_pdgf_signaling_Main_Pathway	Biocarta 1.2	0.00254779	0.00387708
1266	biocarta_pkc_catalyzed_phosphorylation_of_inhibitory_phosphoprotein_of_myosin_phosphatase_Main_Pathway	Biocarta 1.2	0.00254779	0.00387708
1287	biocarta_regulation_of_eif_4e_and_p70s6_kinase_Main_Pathway	Biocarta 1.2	0.00254779	0.00387708
1357	biocarta_t_cell_receptor_signaling_Pathway_(Pathway_protein_ubiquitination_of_PRKCA)	Biocarta 1.2	0.00254779	0.00387708
1376	biocarta_tpo_signaling_Main_Pathway	Biocarta 1.2	0.00254779	0.00387708
1384	biocarta_trka_receptor_signaling_Main_Pathway	Biocarta 1.2	0.00254779	0.00387708
1391	biocarta_vegf_hypoxia_and_angiogenesis_Main_Pathway	Biocarta 1.2	0.00254779	0.00387708
1441	reactome_Activation_of_NF_kappaB_in_B_cells_Main_Pathway	Reactome 1.3	0.00254779	0.00387708
1612	reactome_Depolymerisation_of_the_Nuclear_Lamina_Main_Pathway	Reactome 1.3	0.00254779	0.00387708
2070	reactome_Response_to_elevated_platelet_cytosolic_Ca2__Main_Pathway	Reactome 1.3	0.00254779	0.00387708
590	NCI_Glypican_1_network_Main_Pathway	NCI 1.2	0.00263849	0.00401249
591	NCI_Glypican_1_network_Pathway_(BMP_signaling_pathway)	NCI 1.2	0.0026653	0.00404539
592	NCI_Glypican_1_network_Pathway_(cell_growth)	NCI 1.2	0.0026653	0.00404539
593	NCI_Glypican_1_network_Pathway_(fibroblast_growth_factor_receptor_signaling_pathway)	NCI 1.2	0.0026653	0.00404539
965	NCI_Syndecan_1_mediated_signaling_events_Main_Pathway	NCI 1.2	0.00271839	0.00411531
966	NCI_Syndecan_1_mediated_signaling_events_Pathway_(Tumor_Cell_Invasion)	NCI 1.2	0.00271839	0.00411531
967	NCI_Syndecan_1_mediated_signaling_events_Pathway_(homophilic_cell_adhesion)	NCI 1.2	0.00271839	0.00411531
968	NCI_Syndecan_1_mediated_signaling_events_Pathway_(positive_regulation_of_cell_migration)	NCI 1.2	0.00271839	0.00411531
1869	reactome_NGF_independant_TRKA_activation_Main_Pathway	Reactome 1.3	0.00272805	0.00412727
196	KEGG_Primary_bile_acid_biosynthesis_Main_Pathway	KEGG Adjusted 1.4	0.00273906	0.0041386
2188	reactome_Synthesis_of_bile_acids_and_bile_salts_Main_Pathway	Reactome 1.3	0.00273906	0.0041386
2076	reactome_Rho_GTPase_cycle_Main_Pathway	Reactome 1.3	0.00289718	0.00437468
1823	reactome_LDL_endocytosis_Main_Pathway	Reactome 1.3	0.00319235	0.00481419
2112	reactome_Scavenging_by_Class_F_Receptors_Main_Pathway	Reactome 1.3	0.00319235	0.00481419
218	KEGG_Regulation_of_actin_cytoskeleton_Main_Pathway	KEGG Adjusted 1.4	0.00323672	0.00487796
115	KEGG_Hematopoietic_cell_lineage_Main_Pathway	KEGG Adjusted 1.4	0.00329117	0.00495684
307	NCI_Alpha4_beta1_integrin_signaling_events_Pathway_(cell_adhesion)	NCI 1.2	0.00330053	0.00496774
679	NCI_Integrin_linked_kinase_signaling_Main_Pathway	NCI 1.2	0.00337943	0.00507998
685	NCI_Integrin_linked_kinase_signaling_Pathway_(substrate_adhesion_dependent_cell_spreading)	NCI 1.2	0.00337943	0.00507998
767	NCI_PAR1_mediated_thrombin_signaling_events_Pathway_(cAMP_biosynthetic_process)	NCI 1.2	0.00341574	0.00512143
771	NCI_PAR1_mediated_thrombin_signaling_events_Pathway_(positive_regulation_of_stress_fiber_assembly)	NCI 1.2	0.00341574	0.00512143
772	NCI_PAR1_mediated_thrombin_signaling_events_Pathway_(regulation_of_vascular_permeability)	NCI 1.2	0.00341574	0.00512143
773	NCI_PAR4_mediated_thrombin_signaling_events_Main_Pathway	NCI 1.2	0.00341574	0.00512143
278	KEGG_Vitamin_B6_metabolism_Main_Pathway	KEGG Adjusted 1.4	0.00345472	0.00517325
2298	reactome_Vitamins_B6_activation_to_pyridoxal_phosphate_Main_Pathway	Reactome 1.3	0.00345472	0.00517325
258	KEGG_Thyroid_hormone_synthesis_Main_Pathway	KEGG Adjusted 1.4	0.00349739	0.00523047
2297	reactome_Vitamin_D_calciferol_metabolism_Main_Pathway	Reactome 1.3	0.00349739	0.00523047
1541	reactome_CYP2E1_reactions_Main_Pathway	Reactome 1.3	0.00354846	0.00530347
847	NCI_Regulation_of_CDC42_activity_Main_Pathway	NCI 1.2	0.00357499	0.00533972
171	KEGG_Osteoclast_differentiation_Main_Pathway	KEGG Adjusted 1.4	0.00360763	0.00538503
2154	reactome_Sodium_Proton_exchangers_Main_Pathway	Reactome 1.3	0.00366489	0.00546703
2058	reactome_Release_of_Hh_Np_from_the_secreting_cell_Main_Pathway	Reactome 1.3	0.00379119	0.00565184
1374	biocarta_toll_like_receptor_Main_Pathway	Biocarta 1.2	0.00390556	0.00581863
513	NCI_Endogenous_TLR_signaling_Pathway_(regulation_of_apoptosis)	NCI 1.2	0.00422046	0.00627583
516	NCI_Endogenous_TLR_signaling_Pathway_(regulation_of_cell_proliferation)	NCI 1.2	0.00422046	0.00627583
519	NCI_Endogenous_TLR_signaling_Pathway_(regulation_of_interleukin_1_beta_production)	NCI 1.2	0.00422046	0.00627583
522	NCI_Endogenous_TLR_signaling_Pathway_(respiratory_burst_involved_in_inflammatory_response)	NCI 1.2	0.00422766	0.00628254
1560	reactome_Class_A_1_Rhodopsin_like_receptors__Main_Pathway	Reactome 1.3	0.00424809	0.00630892
1065	biocarta_actions_of_nitric_oxide_in_the_heart_Main_Pathway	Biocarta 1.2	0.00438488	0.00650794
714	NCI_N_cadherin_signaling_events_Main_Pathway	NCI 1.2	0.00439284	0.00651151
719	NCI_N_cadherin_signaling_events_Pathway_(axonogenesis)	NCI 1.2	0.00439284	0.00651151
1540	reactome_CTLA4_inhibitory_signaling_Main_Pathway	Reactome 1.3	0.00443044	0.0065631
276	KEGG_Viral_carcinogenesis_Main_Pathway	KEGG Adjusted 1.4	0.0044577	0.00659931
176	KEGG_Oxytocin_signaling_Main_Pathway	KEGG Adjusted 1.4	0.00446378	0.00660415
2193	reactome_Synthesis_of_epoxy_EET_and_dihydroxyeicosatrienoic_acids_DHET__Main_Pathway	Reactome 1.3	0.0046283	0.00684323
1822	reactome_L1CAM_interactions_Main_Pathway	Reactome 1.3	0.00470305	0.006945
1875	reactome_NOTCH2_Activation_and_Transmission_of_Signal_to_the_Nucleus_Main_Pathway	Reactome 1.3	0.00470305	0.006945
2110	reactome_Scavenging_by_Class_A_Receptors_Main_Pathway	Reactome 1.3	0.00475083	0.00701113
1026	NCI_Wnt_signaling_network_Main_Pathway	NCI 1.2	0.00479931	0.00707823
1504	reactome_Basigin_interactions_Main_Pathway	Reactome 1.3	0.00481349	0.00709467
970	NCI_Syndecan_2_mediated_signaling_events_Pathway_(dendrite_morphogenesis)	NCI 1.2	0.00484757	0.00713146
971	NCI_Syndecan_2_mediated_signaling_events_Pathway_(determination_of_left_right_symmetry)	NCI 1.2	0.00484757	0.00713146
972	NCI_Syndecan_2_mediated_signaling_events_Pathway_(positive_regulation_of_cell_cell_adhesion)	NCI 1.2	0.00484757	0.00713146
257	KEGG_Thyroid_hormone_signaling_Main_Pathway	KEGG Adjusted 1.4	0.00494729	0.0072736
1457	reactome_Acyl_chain_remodelling_of_PC_Main_Pathway	Reactome 1.3	0.00500742	0.00733442
1458	reactome_Acyl_chain_remodelling_of_PE_Main_Pathway	Reactome 1.3	0.00500742	0.00733442
1459	reactome_Acyl_chain_remodelling_of_PG_Main_Pathway	Reactome 1.3	0.00500742	0.00733442
1460	reactome_Acyl_chain_remodelling_of_PI_Main_Pathway	Reactome 1.3	0.00500742	0.00733442
1461	reactome_Acyl_chain_remodelling_of_PS_Main_Pathway	Reactome 1.3	0.00500742	0.00733442
2177	reactome_Synthesis_of_PA_Main_Pathway	Reactome 1.3	0.00500742	0.00733442
1038	NCI_amb2_Integrin_signaling_Pathway_(dendritic_cell_antigen_processing_and_presentation)	NCI 1.2	0.00511901	0.00747918
1039	NCI_amb2_Integrin_signaling_Pathway_(leukocyte_adhesion)	NCI 1.2	0.00511901	0.00747918
1040	NCI_amb2_Integrin_signaling_Pathway_(phagocytosis_triggered_by_activation_of_immune_response_cell_surface_activating_receptor)	NCI 1.2	0.00511901	0.00747918
1041	NCI_amb2_Integrin_signaling_Pathway_(positive_regulation_of_phagocytosis)	NCI 1.2	0.00511901	0.00747918
702	NCI_LPA_receptor_mediated_events_Main_Pathway	NCI 1.2	0.00517191	0.00755175
165	KEGG_Non_small_cell_lung_cancer_Main_Pathway	KEGG Adjusted 1.4	0.00520506	0.00759544
133	KEGG_Leishmaniasis_Main_Pathway	KEGG Adjusted 1.4	0.00527228	0.00768874
873	NCI_Role_of_Calcineurin_dependent_NFAT_signaling_in_lymphocytes_Main_Pathway	NCI 1.2	0.00529086	0.00770626
1099	biocarta_bcr_signaling_Pathway_(re_entry_into_mitotic_cell_cycle)	Biocarta 1.2	0.00529086	0.00770626
2026	reactome_Recycling_of_bile_acids_and_salts_Main_Pathway	Reactome 1.3	0.00530188	0.00771751
1448	reactome_Activation_of_Rac_Main_Pathway	Reactome 1.3	0.00540371	0.0078414
1785	reactome_Inactivation_of_Cdc42_and_Rac_Main_Pathway	Reactome 1.3	0.00540371	0.0078414
2034	reactome_Regulation_of_Commissural_axon_pathfinding_by_Slit_and_Robo_Main_Pathway	Reactome 1.3	0.00540371	0.0078414
2078	reactome_Role_of_Abl_in_Robo_Slit_signaling_Main_Pathway	Reactome 1.3	0.00540371	0.0078414
2141	reactome_Signaling_by_Robo_receptor_Main_Pathway	Reactome 1.3	0.00540371	0.0078414
187	KEGG_Peroxisome_Main_Pathway	KEGG Adjusted 1.4	0.00540821	0.00784307
1783	reactome_ISG15_antiviral_mechanism_Main_Pathway	Reactome 1.3	0.00541852	0.00785317
1652	reactome_Endogenous_sterols_Main_Pathway	Reactome 1.3	0.00565322	0.00818827
1285	biocarta_regulation_of_ck1_cdk5_by_type_1_glutamate_receptors_Main_Pathway	Biocarta 1.2	0.00567974	0.00822161
1862	reactome_MyD88_independent_cascade_Main_Pathway	Reactome 1.3	0.00581702	0.00841512
2311	reactome_Zinc_efflux_and_compartmentalization_by_the_SLC30_family_Main_Pathway	Reactome 1.3	0.00597389	0.00863673
395	NCI_CDC42_signaling_events_Main_Pathway	NCI 1.2	0.00602388	0.00870364
823	NCI_Posttranslational_regulation_of_adherens_junction_stability_and_dissassembly_Main_Pathway	NCI 1.2	0.00603481	0.00871406
75	KEGG_ErbB_signaling_Main_Pathway	KEGG Adjusted 1.4	0.0062553	0.00902688
58	KEGG_Cysteine_and_methionine_metabolism_Main_Pathway	KEGG Adjusted 1.4	0.0064787	0.00933777
267	KEGG_Tyrosine_metabolism_Main_Pathway	KEGG Adjusted 1.4	0.0064787	0.00933777
190	KEGG_Phenylalanine_metabolism_Main_Pathway	KEGG Adjusted 1.4	0.00691415	0.00995315
191	KEGG_Phenylalanine_tyrosine_and_tryptophan_biosynthesis_Main_Pathway	KEGG Adjusted 1.4	0.00691415	0.00995315
1602	reactome_DAP12_signaling_Main_Pathway	Reactome 1.3	0.00701267	0.0100888
2111	reactome_Scavenging_by_Class_B_Receptors_Main_Pathway	Reactome 1.3	0.00704884	0.0101346
2035	reactome_Regulation_of_Complement_cascade_Main_Pathway	Reactome 1.3	0.00717186	0.0103052
84	KEGG_Fc_gamma_R_mediated_phagocytosis_Main_Pathway	KEGG Adjusted 1.4	0.00730656	0.0104923
510	NCI_Endogenous_TLR_signaling_Main_Pathway	NCI 1.2	0.00735916	0.0105613
77	KEGG_Ether_lipid_metabolism_Main_Pathway	KEGG Adjusted 1.4	0.00738503	0.010592
1073	biocarta_akap95_role_in_mitosis_and_chromosome_dynamics_Main_Pathway	Biocarta 1.2	0.00754338	0.0107078
1074	biocarta_akap95_role_in_mitosis_and_chromosome_dynamics_Pathway_(mitotic_chromosome_condensation)	Biocarta 1.2	0.00754338	0.0107078
1075	biocarta_akap95_role_in_mitosis_and_chromosome_dynamics_Pathway_(mitotic_chromosome_decondensation)	Biocarta 1.2	0.00754338	0.0107078
1176	biocarta_how_progesterone_initiates_the_oocyte_maturation_Main_Pathway	Biocarta 1.2	0.00754338	0.0107078
1177	biocarta_how_progesterone_initiates_the_oocyte_maturation_Pathway_(oocyte_maturation)	Biocarta 1.2	0.00754338	0.0107078
1223	biocarta_mcalpain_and_friends_in_cell_motility_Main_Pathway	Biocarta 1.2	0.00754338	0.0107078
1272	biocarta_protein_kinase_a_at_the_centrosome_Main_Pathway	Biocarta 1.2	0.00754338	0.0107078
1298	biocarta_repression_of_pain_sensation_by_the_transcriptional_regulator_dream_Main_Pathway	Biocarta 1.2	0.00754338	0.0107078
1305	biocarta_rho_selective_guanine_exchange_factor_akap13_mediates_stress_fiber_formation_Main_Pathway	Biocarta 1.2	0.00754338	0.0107078
1377	biocarta_transcription_factor_creb_and_its_extracellular_signals_Main_Pathway	Biocarta 1.2	0.00754338	0.0107078
1378	biocarta_transcription_regulation_by_methyltransferase_of_carm1_Main_Pathway	Biocarta 1.2	0.00754338	0.0107078
1603	reactome_DARPP_32_events_Main_Pathway	Reactome 1.3	0.00754338	0.0107078
1830	reactome_Loss_of_Nlp_from_mitotic_centrosomes_Main_Pathway	Reactome 1.3	0.00754338	0.0107078
1831	reactome_Loss_of_proteins_required_for_interphase_microtubule_organizationA_from_the_centrosome_Main_Pathway	Reactome 1.3	0.00754338	0.0107078
1933	reactome_PKA_activation_in_glucagon_signalling_Main_Pathway	Reactome 1.3	0.00754338	0.0107078
2024	reactome_Recruitment_of_mitotic_centrosome_proteins_and_complexes_Main_Pathway	Reactome 1.3	0.00754338	0.0107078
2042	reactome_Regulation_of_PLK1_Activity_at_G2_M_Transition_Main_Pathway	Reactome 1.3	0.00754338	0.0107078
248	KEGG_Systemic_lupus_erythematosus_Main_Pathway	KEGG Adjusted 1.4	0.00761382	0.0108012
1163	biocarta_granzyme_a_mediated_apoptosis_Pathway_(DNA_fragmentation_during_apoptosis)	Biocarta 1.2	0.00775988	0.0109885
1164	biocarta_granzyme_a_mediated_apoptosis_Pathway_(DNA_repair)	Biocarta 1.2	0.00775988	0.0109885
1166	biocarta_granzyme_a_mediated_apoptosis_Pathway_(Pathway_regulation_of_transcription_via_SET_ANP32A_APEX1)	Biocarta 1.2	0.00775988	0.0109885
180	KEGG_Pancreatic_secretion_Main_Pathway	KEGG Adjusted 1.4	0.00783471	0.0110877
1983	reactome_Proton_coupled_monocarboxylate_transport_Main_Pathway	Reactome 1.3	0.00818874	0.0115818
936	NCI_Signaling_events_mediated_by_the_Hedgehog_family_Main_Pathway	NCI 1.2	0.00823806	0.0116445
2245	reactome_Trafficking_and_processing_of_endosomal_TLR_Main_Pathway	Reactome 1.3	0.00894325	0.0126337
988	NCI_Thromboxane_A2_receptor_signaling_Pathway_(MAPKKK_cascade)	NCI 1.2	0.00905042	0.0127774
1759	reactome_HS_GAG_degradation_Main_Pathway	Reactome 1.3	0.00911862	0.0128659
1372	biocarta_tnfr2_signaling_Main_Pathway	Biocarta 1.2	0.00940878	0.0132594
1373	biocarta_tnfr2_signaling_Pathway_(Pathway_protein_ubiquitination_of_MAP3K1_TNFAIP3_MAP3K14)	Biocarta 1.2	0.00940878	0.0132594
181	KEGG_Pantothenate_and_CoA_biosynthesis_Main_Pathway	KEGG Adjusted 1.4	0.00951772	0.0134048
1601	reactome_DAP12_interactions_Main_Pathway	Reactome 1.3	0.00991421	0.0139549
116	KEGG_Hepatitis_B_Main_Pathway	KEGG Adjusted 1.4	0.00993824	0.0139803
311	NCI_Alpha9_beta1_integrin_signaling_events_Main_Pathway	NCI 1.2	0.00994805	0.0139857
627	NCI_IL23_mediated_signaling_events_Pathway_(T_cell_proliferation)	NCI 1.2	0.00999716	0.0140128
628	NCI_IL23_mediated_signaling_events_Pathway_(keratinocyte_proliferation)	NCI 1.2	0.00999716	0.0140128
629	NCI_IL23_mediated_signaling_events_Pathway_(positive_regulation_of_T_cell_mediated_cytotoxicity)	NCI 1.2	0.00999716	0.0140128
630	NCI_IL23_mediated_signaling_events_Pathway_(positive_regulation_of_chronic_inflammatory_response)	NCI 1.2	0.00999716	0.0140128
632	NCI_IL23_mediated_signaling_events_Pathway_(positive_regulation_of_humoral_immune_response)	NCI 1.2	0.00999716	0.0140128
1	KEGG_AMPK_signaling_Main_Pathway	KEGG Adjusted 1.4	0.0100329	0.0140545
153	KEGG_Mucin_type_O_Glycan_biosynthesis_Main_Pathway	KEGG Adjusted 1.4	0.0102526	0.0143451
1911	reactome_O_linked_glycosylation_of_mucins_Main_Pathway	Reactome 1.3	0.0102526	0.0143451
2175	reactome_Synthesis_of_Leukotrienes_LT_and_Eoxins_EX__Main_Pathway	Reactome 1.3	0.0104281	0.0145819
294	NCI_ATF_2_transcription_factor_network_Main_Pathway	NCI 1.2	0.0110187	0.0152351
574	NCI_FOXA1_transcription_factor_network_Main_Pathway	NCI 1.2	0.0110187	0.0152351
690	NCI_LKB1_signaling_events_Main_Pathway	NCI 1.2	0.0110187	0.0152351
809	NCI_Plasma_membrane_estrogen_receptor_signaling_Pathway_(MAPKKK_cascade)	NCI 1.2	0.0110187	0.0152351
810	NCI_Plasma_membrane_estrogen_receptor_signaling_Pathway_(apoptosis)	NCI 1.2	0.0110187	0.0152351
811	NCI_Plasma_membrane_estrogen_receptor_signaling_Pathway_(cAMP_biosynthetic_process)	NCI 1.2	0.0110187	0.0152351
812	NCI_Plasma_membrane_estrogen_receptor_signaling_Pathway_(cell_adhesion)	NCI 1.2	0.0110187	0.0152351
816	NCI_Plasma_membrane_estrogen_receptor_signaling_Pathway_(vasodilation)	NCI 1.2	0.0110187	0.0152351
861	NCI_Regulation_of_retinoblastoma_protein_Main_Pathway	NCI 1.2	0.0109395	0.0152351
863	NCI_Regulation_of_retinoblastoma_protein_Pathway_(erythrocyte_differentiation)	NCI 1.2	0.0109395	0.0152351
894	NCI_Signaling_events_mediated_by_HDAC_Class_II_Main_Pathway	NCI 1.2	0.0110187	0.0152351
949	NCI_Signaling_mediated_by_p38_alpha_and_p38_beta_Main_Pathway	NCI 1.2	0.0110187	0.0152351
1012	NCI_Validated_nuclear_estrogen_receptor_alpha_network_Main_Pathway	NCI 1.2	0.0110187	0.0152351
1141	biocarta_downregulated_of_mta_3_in_er_negative_breast_tumors_Main_Pathway	Biocarta 1.2	0.0110187	0.0152351
1258	biocarta_pelp1_modulation_of_estrogen_receptor_activity_Main_Pathway	Biocarta 1.2	0.0110187	0.0152351
1316	biocarta_role_of_erbb2_in_signal_transduction_and_oncology_Main_Pathway	Biocarta 1.2	0.0110187	0.0152351
1907	reactome_Nuclear_Receptor_transcription_Main_Pathway	Reactome 1.3	0.0110187	0.0152351
1909	reactome_Nuclear_signaling_by_ERBB4_Main_Pathway	Reactome 1.3	0.0110187	0.0152351
2343	reactome_temp_Nuclear_Receptor_transcription_pathway	Reactome 1.3	0.0110187	0.0152351
358	NCI_Atypical_NF_kappaB_Main_Pathway	NCI 1.2	0.0114247	0.0157409
359	NCI_Atypical_NF_kappaB_Pathway_(Pathway_degradation_of_NFKB1_NFKBIA)	NCI 1.2	0.0114247	0.0157409
361	NCI_Atypical_NF_kappaB_Pathway_(positive_regulation_of_anti_apoptosis)	NCI 1.2	0.0114247	0.0157409
1196	biocarta_il_7_signal_transduction_Main_Pathway	Biocarta 1.2	0.0114247	0.0157409
1197	biocarta_il_7_signal_transduction_Pathway_(cell_proliferation)	Biocarta 1.2	0.0114247	0.0157409
2041	reactome_Regulation_of_KIT_signaling_Main_Pathway	Reactome 1.3	0.0114247	0.0157409
97	KEGG_Glycerolipid_metabolism_Main_Pathway	KEGG Adjusted 1.4	0.0116944	0.016103
992	NCI_Thromboxane_A2_receptor_signaling_Pathway_(platelet_activation)	NCI 1.2	0.0118955	0.0163702
1648	reactome_Elastic_fibre_formation_Main_Pathway	Reactome 1.3	0.0125141	0.0172115
98	KEGG_Glycerophospholipid_metabolism_Main_Pathway	KEGG Adjusted 1.4	0.0126146	0.0173192
135	KEGG_Linoleic_acid_metabolism_Main_Pathway	KEGG Adjusted 1.4	0.0126146	0.0173192
281	KEGG_alpha_Linolenic_acid_metabolism_Main_Pathway	KEGG Adjusted 1.4	0.0126146	0.0173192
386	NCI_Beta5_beta6_beta7_and_beta8_integrin_cell_surface_interactions_Main_Pathway	NCI 1.2	0.0126622	0.0173744
1800	reactome_Integrin_cell_surface_interactions_Main_Pathway	Reactome 1.3	0.0128869	0.0176724
38	KEGG_Calcium_signaling_Main_Pathway	KEGG Adjusted 1.4	0.0129688	0.0177742
348	NCI_Arf6_trafficking_events_Pathway_(cell_adhesion_mediated_by_integrin)	NCI 1.2	0.0131622	0.0180182
818	NCI_Plexin_D1_Signaling_Pathway_(cell_adhesion_mediated_by_integrin)	NCI 1.2	0.0131622	0.0180182
59	KEGG_Cytokine_cytokine_receptor_interaction_Main_Pathway	KEGG Adjusted 1.4	0.0132582	0.0181391
110	KEGG_GnRH_signaling_Main_Pathway	KEGG Adjusted 1.4	0.013677	0.0187012
761	NCI_Osteopontin_mediated_events_Main_Pathway	NCI 1.2	0.0137219	0.0187407
762	NCI_Osteopontin_mediated_events_Pathway_(bone_resorption)	NCI 1.2	0.0137219	0.0187407
184	KEGG_Pathways_in_cancer_Main_Pathway	KEGG Adjusted 1.4	0.0138652	0.0189254
829	NCI_RAC1_signaling_Main_Pathway	NCI 1.2	0.0140171	0.0191105
2283	reactome_VEGFA_VEGFR2_Pathway_Main_Pathway	Reactome 1.3	0.0140171	0.0191105
1493	reactome_Association_of_TriC_CCT_with_target_proteins_during_biosynthesis_Main_Pathway	Reactome 1.3	0.0146794	0.0200019
1557	reactome_Chylomicron_mediated_lipid_transport_Main_Pathway	Reactome 1.3	0.0149796	0.020399
1958	reactome_Platelet_Adhesion_to_exposed_collagen_Main_Pathway	Reactome 1.3	0.0150156	0.0204363
1718	reactome_G_alpha_12_13_signalling_events_Main_Pathway	Reactome 1.3	0.0151929	0.0206655
53	KEGG_Cocaine_addiction_Main_Pathway	KEGG Adjusted 1.4	0.0152734	0.0207389
91	KEGG_Gap_junction_Main_Pathway	KEGG Adjusted 1.4	0.0152734	0.0207389
1622	reactome_Dopamine_receptors_Main_Pathway	Reactome 1.3	0.0152734	0.0207389
147	KEGG_Melanoma_Main_Pathway	KEGG Adjusted 1.4	0.0156827	0.0212824
673	NCI_IL8_and_CXCR2_mediated_signaling_events_Pathway_(Pathway_degradation_of_CXCL8)	NCI 1.2	0.0157412	0.0213371
674	NCI_IL8_and_CXCR2_mediated_signaling_events_Pathway_(cAMP_biosynthetic_process)	NCI 1.2	0.0157412	0.0213371
225	KEGG_Rheumatoid_arthritis_Main_Pathway	KEGG Adjusted 1.4	0.0159474	0.0216041
1049	NCI_p38_signaling_mediated_by_MAPKAP_kinases_Main_Pathway	NCI 1.2	0.0160967	0.0217811
1051	NCI_p38_signaling_mediated_by_MAPKAP_kinases_Pathway_(chemotaxis)	NCI 1.2	0.0160967	0.0217811
1893	reactome_Neurofascin_interactions_Main_Pathway	Reactome 1.3	0.0165412	0.0223698
95	KEGG_Glutamatergic_synapse_Main_Pathway	KEGG Adjusted 1.4	0.0166916	0.0225601
1884	reactome_Nef_Mediated_CD4_Down_regulation_Main_Pathway	Reactome 1.3	0.0169089	0.0228407
645	NCI_IL2_mediated_signaling_events_Pathway_(natural_killer_cell_mediated_cytotoxicity)	NCI 1.2	0.0171252	0.0230268
647	NCI_IL2_signaling_events_mediated_by_PI3K_Main_Pathway	NCI 1.2	0.0171252	0.0230268
648	NCI_IL2_signaling_events_mediated_by_PI3K_Pathway_(T_cell_proliferation)	NCI 1.2	0.0171252	0.0230268
649	NCI_IL2_signaling_events_mediated_by_PI3K_Pathway_(actin_cytoskeleton_organization)	NCI 1.2	0.0171252	0.0230268
650	NCI_IL2_signaling_events_mediated_by_PI3K_Pathway_(cell_proliferation)	NCI 1.2	0.0171252	0.0230268
651	NCI_IL2_signaling_events_mediated_by_PI3K_Pathway_(cell_survival)	NCI 1.2	0.0171252	0.0230268
1189	biocarta_il_2_signaling_Main_Pathway	Biocarta 1.2	0.0171252	0.0230268
1808	reactome_Interleukin_2_signaling_Main_Pathway	Reactome 1.3	0.0171252	0.0230268
242	KEGG_Steroid_biosynthesis_Main_Pathway	KEGG Adjusted 1.4	0.0176504	0.0237194
1767	reactome_Hormone_sensitive_lipase_HSL_mediated_triacylglycerol_hydrolysis_Main_Pathway	Reactome 1.3	0.0177155	0.0237796
2252	reactome_Transcriptional_regulation_of_white_adipocyte_differentiation_Main_Pathway	Reactome 1.3	0.0177155	0.0237796
220	KEGG_Regulation_of_lipolysis_in_adipocytes_Main_Pathway	KEGG Adjusted 1.4	0.0177696	0.0238386
973	NCI_Syndecan_3_mediated_signaling_events_Main_Pathway	NCI 1.2	0.0179217	0.024015
974	NCI_Syndecan_3_mediated_signaling_events_Pathway_(limb_bud_formation)	NCI 1.2	0.0179217	0.024015
1098	biocarta_bcr_signaling_Main_Pathway	Biocarta 1.2	0.0180325	0.0241497
670	NCI_IL8_and_CXCR1_mediated_signaling_events_Pathway_(cAMP_biosynthetic_process)	NCI 1.2	0.0180728	0.0241899
1360	biocarta_the_co_stimulatory_signal_during_t_cell_activation_Main_Pathway	Biocarta 1.2	0.0189124	0.0252849
1361	biocarta_the_co_stimulatory_signal_during_t_cell_activation_Pathway_(T_cell_activation)	Biocarta 1.2	0.0189124	0.0252849
1523	reactome_CD28_co_stimulation_Main_Pathway	Reactome 1.3	0.0192646	0.0257117
1524	reactome_CD28_dependent_PI3K_Akt_signaling_Main_Pathway	Reactome 1.3	0.0192646	0.0257117
1525	reactome_CD28_dependent_Vav1_Main_Pathway	Reactome 1.3	0.0192646	0.0257117
479	NCI_Direct_p53_effectors_Main_Pathway	NCI 1.2	0.0196739	0.0262431
1722	reactome_G_alpha_z_signalling_events_Main_Pathway	Reactome 1.3	0.0198669	0.0264855
1938	reactome_POU5F1_OCT4_SOX2_NANOG_activate_genes_related_to_proliferation_Main_Pathway	Reactome 1.3	0.020041	0.0267023
634	NCI_IL27_mediated_signaling_events_Pathway_(MAPKKK_cascade)	NCI 1.2	0.0204561	0.0270862
635	NCI_IL27_mediated_signaling_events_Pathway_(T_cell_proliferation)	NCI 1.2	0.0204561	0.0270862
636	NCI_IL27_mediated_signaling_events_Pathway_(T_cell_proliferation_during_immune_response)	NCI 1.2	0.0204561	0.0270862
637	NCI_IL27_mediated_signaling_events_Pathway_(T_helper_2_cell_differentiation)	NCI 1.2	0.0204561	0.0270862
638	NCI_IL27_mediated_signaling_events_Pathway_(cytokine_production_during_immune_response)	NCI 1.2	0.0204561	0.0270862
639	NCI_IL27_mediated_signaling_events_Pathway_(mast_cell_activation)	NCI 1.2	0.0204561	0.0270862
640	NCI_IL27_mediated_signaling_events_Pathway_(positive_regulation_of_T_cell_mediated_cytotoxicity)	NCI 1.2	0.0204561	0.0270862
641	NCI_IL27_mediated_signaling_events_Pathway_(positive_regulation_of_mast_cell_cytokine_production)	NCI 1.2	0.0204561	0.0270862
1063	biocarta__U_00DF_arrestins_in_gpcr_desensitization_Main_Pathway	Biocarta 1.2	0.0204391	0.0270862
1308	biocarta_role_of_U_00DF_arrestins_in_the_activation_and_targeting_of_map_kinases_Main_Pathway	Biocarta 1.2	0.0204391	0.0270862
1948	reactome_Phagosomal_maturation_early_endosomal_stage__Main_Pathway	Reactome 1.3	0.0204178	0.0270862
1037	NCI_amb2_Integrin_signaling_Pathway_(actin_filament_polymerization)	NCI 1.2	0.02058	0.0272349
807	NCI_Plasma_membrane_estrogen_receptor_signaling_Main_Pathway	NCI 1.2	0.0208871	0.0276257
45	KEGG_Chemical_carcinogenesis_Main_Pathway	KEGG Adjusted 1.4	0.0210443	0.0278022
1638	reactome_EPHB_mediated_forward_signaling_Main_Pathway	Reactome 1.3	0.0210363	0.0278022
1662	reactome_Extrinsic_Pathway_Main_Pathway	Reactome 1.3	0.0211305	0.0279004
56	KEGG_Complement_and_coagulation_cascades_Main_Pathway	KEGG Adjusted 1.4	0.0211951	0.02797
620	NCI_IL12_mediated_signaling_events_Main_Pathway	NCI 1.2	0.0212553	0.0280336
1425	reactome_Abnormal_metabolism_in_phenylketonuria_Main_Pathway	Reactome 1.3	0.0212992	0.0280757
1280	biocarta_ras_independent_pathway_in_nk_cell_mediated_cytotoxicity_Main_Pathway	Biocarta 1.2	0.0216455	0.0285162
849	NCI_Regulation_of_Ras_family_activation_Main_Pathway	NCI 1.2	0.0219072	0.0288284
1895	reactome_Nicotinamide_salvaging_Main_Pathway	Reactome 1.3	0.0219065	0.0288284
655	NCI_IL3_mediated_signaling_events_Main_Pathway	NCI 1.2	0.0221929	0.0291717
1190	biocarta_il_3_signaling_Main_Pathway	Biocarta 1.2	0.0221929	0.0291717
633	NCI_IL27_mediated_signaling_events_Main_Pathway	NCI 1.2	0.0229115	0.0300994
1004	NCI_VEGFR1_specific_signals_Main_Pathway	NCI 1.2	0.0233428	0.0305632
1011	NCI_VEGF_and_VEGFR_signaling_network_Main_Pathway	NCI 1.2	0.0233428	0.0305632
1538	reactome_CRMPs_in_Sema3A_signaling_Main_Pathway	Reactome 1.3	0.0233428	0.0305632
2087	reactome_SEMA3A_Plexin_repulsion_signaling_by_inhibiting_Integrin_adhesion_Main_Pathway	Reactome 1.3	0.0233428	0.0305632
2114	reactome_Sema3A_PAK_dependent_Axon_repulsion_Main_Pathway	Reactome 1.3	0.0233428	0.0305632
2126	reactome_Signal_transduction_by_L1_Main_Pathway	Reactome 1.3	0.0233428	0.0305632
1276	biocarta_rac1_cell_motility_signaling_Main_Pathway	Biocarta 1.2	0.0236115	0.030829
1278	biocarta_rac1_cell_motility_signaling_Pathway_(actin_filament_organization)	Biocarta 1.2	0.0236115	0.030829
1279	biocarta_rac1_cell_motility_signaling_Pathway_(phosphatidic_acid_metabolic_process)	Biocarta 1.2	0.0236115	0.030829
1301	biocarta_rho_cell_motility_signaling_Main_Pathway	Biocarta 1.2	0.0236115	0.030829
1302	biocarta_rho_cell_motility_signaling_Pathway_(actin_filament_polymerization)	Biocarta 1.2	0.0236115	0.030829
1702	reactome_Free_fatty_acid_receptors_Main_Pathway	Reactome 1.3	0.0237795	0.0310311
385	NCI_Beta3_integrin_cell_surface_interactions_Main_Pathway	NCI 1.2	0.0238945	0.0311638
978	NCI_TCR_signaling_in_naive_CD4_T_cells_Pathway_(proteasomal_ubiquitin_dependent_protein_catabolic_process)	NCI 1.2	0.0244674	0.0318933
1811	reactome_Interleukin_receptor_SHC_signaling_Main_Pathway	Reactome 1.3	0.0248793	0.0324123
306	NCI_Alpha4_beta1_integrin_signaling_events_Main_Pathway	NCI 1.2	0.0253347	0.0329871
240	KEGG_Staphylococcus_aureus_infection_Main_Pathway	KEGG Adjusted 1.4	0.0253799	0.0330277
8	KEGG_Alcoholism_Main_Pathway	KEGG Adjusted 1.4	0.0264681	0.0344246
1960	reactome_Platelet_sensitization_by_LDL_Main_Pathway	Reactome 1.3	0.027825	0.0361694
1990	reactome_Pyrimidine_salvage_reactions_Main_Pathway	Reactome 1.3	0.0279774	0.0363474
39	KEGG_Carbohydrate_digestion_and_absorption_Main_Pathway	KEGG Adjusted 1.4	0.0282541	0.0366865
672	NCI_IL8_and_CXCR2_mediated_signaling_events_Main_Pathway	NCI 1.2	0.0284856	0.0369666
646	NCI_IL2_mediated_signaling_events_Pathway_(positive_regulation_of_cell_cell_adhesion)	NCI 1.2	0.0296213	0.0384192
668	NCI_IL8_and_CXCR1_mediated_signaling_events_Main_Pathway	NCI 1.2	0.0299988	0.0388874
270	KEGG_VEGF_signaling_Main_Pathway	KEGG Adjusted 1.4	0.0301841	0.0391059
130	KEGG_Intestinal_immune_network_for_IgA_production_Main_Pathway	KEGG Adjusted 1.4	0.0307914	0.0398486
1399	biocarta_yaci_and_bcma_stimulation_of_b_cell_immune_responses_Main_Pathway	Biocarta 1.2	0.0307914	0.0398486
157	KEGG_Natural_killer_cell_mediated_cytotoxicity_Main_Pathway	KEGG Adjusted 1.4	0.0315617	0.040823
27	KEGG_Bacterial_invasion_of_epithelial_cells_Main_Pathway	KEGG Adjusted 1.4	0.0316084	0.0408609
1243	biocarta_nfat_and_hypertrophy_of_the_heart__Main_Pathway	Biocarta 1.2	0.0318025	0.0410892
1025	NCI_Visual_signal_transduction_Rods_Main_Pathway	NCI 1.2	0.0320394	0.0413497
1453	reactome_Activation_of_the_phototransduction_cascade_Main_Pathway	Reactome 1.3	0.0320394	0.0413497
106	KEGG_Glycosphingolipid_biosynthesis_globo_series_Main_Pathway	KEGG Adjusted 1.4	0.0325602	0.0419987
99	KEGG_Glycine_serine_and_threonine_metabolism_Main_Pathway	KEGG Adjusted 1.4	0.0335808	0.0432913
2197	reactome_Synthesis_secretion_and_deacylation_of_Ghrelin_Main_Pathway	Reactome 1.3	0.0351655	0.0453094
1806	reactome_Interleukin_1_processing_Main_Pathway	Reactome 1.3	0.0353235	0.045488
1169	biocarta_hiv_1_nef_negative_effector_of_fas_and_tnf_Pathway_(Pathway_degradation_of_CASP8_BIRC2_APAF1)	Biocarta 1.2	0.0355812	0.0457947
687	NCI_Integrins_in_angiogenesis_Pathway_(angiogenesis)	NCI 1.2	0.0361316	0.0464776
744	NCI_Neurotrophic_factor_mediated_Trk_receptor_signaling_Main_Pathway	NCI 1.2	0.0364514	0.0468632
1321	biocarta_role_of_mef2d_in_t_cell_apoptosis_Main_Pathway	Biocarta 1.2	0.0367516	0.0472234
979	NCI_TCR_signaling_in_naive_CD8_T_cells_Main_Pathway	NCI 1.2	0.0367743	0.0472266
211	KEGG_Pyruvate_metabolism_Main_Pathway	KEGG Adjusted 1.4	0.0369523	0.0473804
332	NCI_Arf1_Main_Pathway	NCI 1.2	0.0369749	0.0473804
1471	reactome_Alpha_defensins_Main_Pathway	Reactome 1.3	0.0369749	0.0473804
2303	reactome_Vpu_mediated_degradation_of_CD4_Main_Pathway	Reactome 1.3	0.0369749	0.0473804
24	KEGG_Autoimmune_thyroid_disease_Main_Pathway	KEGG Adjusted 1.4	0.0377074	0.0482399
111	KEGG_Graft_versus_host_disease_Main_Pathway	KEGG Adjusted 1.4	0.0377074	0.0482399
206	KEGG_Protein_processing_in_endoplasmic_reticulum_Main_Pathway	KEGG Adjusted 1.4	0.037679	0.0482399
1168	biocarta_hiv_1_nef_negative_effector_of_fas_and_tnf_Main_Pathway	Biocarta 1.2	0.0388083	0.0496213
1794	reactome_Insulin_processing_Main_Pathway	Reactome 1.3	0.0391498	0.0500307
236	KEGG_Small_cell_lung_cancer_Main_Pathway	KEGG Adjusted 1.4	0.0402734	0.0514385
312	NCI_Alpha9_beta1_integrin_signaling_events_Pathway_(cell_migration)	NCI 1.2	0.0411026	0.0524691
48	KEGG_Cholinergic_synapse_Main_Pathway	KEGG Adjusted 1.4	0.0428728	0.054699
222	KEGG_Renin_angiotensin_system_Main_Pathway	KEGG Adjusted 1.4	0.0429315	0.0547441
261	KEGG_Toxoplasmosis_Main_Pathway	KEGG Adjusted 1.4	0.0430077	0.0547519
511	NCI_Endogenous_TLR_signaling_Pathway_(cell_migration)	NCI 1.2	0.0430077	0.0547519
515	NCI_Endogenous_TLR_signaling_Pathway_(regulation_of_cell_matrix_adhesion)	NCI 1.2	0.0430077	0.0547519
379	NCI_BCR_signaling_Pathway_(cytokine_secretion)	NCI 1.2	0.0435676	0.0552548
425	NCI_Calcineurin_regulated_NFAT_dependent_transcription_in_lymphocytes_Pathway_(T_cell_anergy)	NCI 1.2	0.0435676	0.0552548
426	NCI_Calcium_signaling_in_the_CD4_TCR_Main_Pathway	NCI 1.2	0.0435676	0.0552548
2016	reactome_RNF_mutants_show_enhanced_WNT_signaling_and_proliferation_Main_Pathway	Reactome 1.3	0.0435676	0.0552548
2144	reactome_Signaling_by_Wnt_Main_Pathway	Reactome 1.3	0.0435676	0.0552548
2308	reactome_XAV939_inhibits_tankyrase_stabilizing_AXIN_Main_Pathway	Reactome 1.3	0.0435676	0.0552548
2329	reactome_misspliced_LRP5_mutants_have_enhanced_beta_catenin_dependent_signaling_Main_Pathway	Reactome 1.3	0.0435676	0.0552548
421	NCI_CXCR4_mediated_signaling_events_Pathway_(regulation_of_heterotypic_cell_cell_adhesion)	NCI 1.2	0.0437682	0.0554791
2230	reactome_The_retinoid_cycle_in_cones_daylight_vision__Main_Pathway	Reactome 1.3	0.0440091	0.0557543
460	NCI_Class_IB_PI3K_non_lipid_kinase_events_Main_Pathway	NCI 1.2	0.0451467	0.0569894
461	NCI_Class_IB_PI3K_non_lipid_kinase_events_Pathway_(cAMP_biosynthetic_process)	NCI 1.2	0.0451467	0.0569894
463	NCI_Class_I_PI3K_signaling_events_Pathway_(actin_cytoskeleton_reorganization)	NCI 1.2	0.0451467	0.0569894
464	NCI_Class_I_PI3K_signaling_events_Pathway_(cell_survival)	NCI 1.2	0.0451467	0.0569894
785	NCI_PDGFR_beta_signaling_Pathway_(receptor_recycling)	NCI 1.2	0.0451467	0.0569894
786	NCI_PDGFR_beta_signaling_Pathway_(ruffle_organization)	NCI 1.2	0.0451467	0.0569894
1217	biocarta_lck_and_fyn_tyrosine_kinases_in_initiation_of_tcr_activation_Main_Pathway	Biocarta 1.2	0.0451541	0.0569894
50	KEGG_Circadian_entrainment_Main_Pathway	KEGG Adjusted 1.4	0.0458922	0.0578898
2214	reactome_TWIK_related_potassium_channel_TREK__Main_Pathway	Reactome 1.3	0.0471009	0.0593826
14	KEGG_Amoebiasis_Main_Pathway	KEGG Adjusted 1.4	0.0475691	0.0599085
250	KEGG_TNF_signaling_Main_Pathway	KEGG Adjusted 1.4	0.0475683	0.0599085
1070	biocarta_adp_ribosylation_factor_Main_Pathway	Biocarta 1.2	0.0479818	0.0603957
1917	reactome_Organic_anion_transport_Main_Pathway	Reactome 1.3	0.0484507	0.0609533
2255	reactome_Translocation_of_GLUT4_to_the_plasma_membrane_Main_Pathway	Reactome 1.3	0.0485058	0.0609899
780	NCI_PDGFR_beta_signaling_Main_Pathway	NCI 1.2	0.0522835	0.0657046
1556	reactome_Chondroitin_sulfate_biosynthesis_Main_Pathway	Reactome 1.3	0.0527061	0.0662003
2	KEGG_Acute_myeloid_leukemia_Main_Pathway	KEGG Adjusted 1.4	0.0528858	0.0663904
1162	biocarta_granzyme_a_mediated_apoptosis_Main_Pathway	Biocarta 1.2	0.052969	0.0664237
1165	biocarta_granzyme_a_mediated_apoptosis_Pathway_(Pathway_degradation_of_GZMB)	Biocarta 1.2	0.052969	0.0664237
1479	reactome_Amyloids_Main_Pathway	Reactome 1.3	0.0532278	0.0667126
1598	reactome_Cytosolic_sulfonation_of_small_molecules_Main_Pathway	Reactome 1.3	0.0544849	0.0682516
1438	reactome_Activation_of_G_protein_gated_Potassium_channels_Main_Pathway	Reactome 1.3	0.054677	0.0684192
1789	reactome_Inhibition_of_voltage_gated_Ca2_channels_via_Gbeta_gamma_subunits_Main_Pathway	Reactome 1.3	0.054677	0.0684192
2129	reactome_Signaling_by_EGFR_Main_Pathway	Reactome 1.3	0.0547707	0.0684999
1066	biocarta_activation_of_camp_dependent_protein_kinase_pka_Main_Pathway	Biocarta 1.2	0.0555811	0.0694393
1125	biocarta_chrebp_regulation_by_carbohydrates_and_camp_Main_Pathway	Biocarta 1.2	0.0555811	0.0694393
1926	reactome_PECAM1_interactions_Main_Pathway	Reactome 1.3	0.056478	0.0705223
883	NCI_S1P3_Main_Pathway	NCI 1.2	0.0568124	0.0708643
1130	biocarta_cxcr4_signaling_Main_Pathway	Biocarta 1.2	0.0568124	0.0708643
440	NCI_Cellular_roles_of_Anthrax_toxin_Main_Pathway	NCI 1.2	0.0568668	0.0708946
2161	reactome_Striated_Muscle_Contraction_Main_Pathway	Reactome 1.3	0.057767	0.0719785
603	NCI_HIV_1_Nef_Negative_effector_of_Fas_and_TNF_alpha_Main_Pathway	NCI 1.2	0.0579107	0.0720737
1714	reactome_GRB2_SOS_provides_linkage_to_MAPK_signaling_for_Integrins_Main_Pathway	Reactome 1.3	0.0579356	0.0720737
2333	reactome_p130Cas_linkage_to_MAPK_signaling_for_integrins_Main_Pathway	Reactome 1.3	0.0579356	0.0720737
1885	reactome_Nef_Mediated_CD8_Down_regulation_Main_Pathway	Reactome 1.3	0.058214	0.0723817
271	KEGG_Valine_leucine_and_isoleucine_biosynthesis_Main_Pathway	KEGG Adjusted 1.4	0.0592951	0.0736868
503	NCI_E_cadherin_signaling_in_the_nascent_adherens_junction_Main_Pathway	NCI 1.2	0.060029	0.0745593
1517	reactome_Binding_and_entry_of_HIV_virion_Main_Pathway	Reactome 1.3	0.0603784	0.0749536
2117	reactome_Senescence_Associated_Secretory_Phenotype_SASP__Main_Pathway	Reactome 1.3	0.0607382	0.0753604
129	KEGG_Insulin_signaling_Main_Pathway	KEGG Adjusted 1.4	0.061358	0.0760489
200	KEGG_Prolactin_signaling_Main_Pathway	KEGG Adjusted 1.4	0.061358	0.0760489
1683	reactome_Fibronectin_matrix_formation_Main_Pathway	Reactome 1.3	0.0614043	0.0760661
1359	biocarta_the_41bb_dependent_immune_response_Main_Pathway	Biocarta 1.2	0.0615519	0.0762086
160	KEGG_Nicotinate_and_nicotinamide_metabolism_Main_Pathway	KEGG Adjusted 1.4	0.062709	0.0776003
2187	reactome_Synthesis_of_UDP_N_acetyl_glucosamine_Main_Pathway	Reactome 1.3	0.0631506	0.0781055
1575	reactome_Common_Pathway_Main_Pathway	Reactome 1.3	0.0645057	0.0797395
127	KEGG_Inositol_phosphate_metabolism_Main_Pathway	KEGG Adjusted 1.4	0.0653008	0.0806798
604	NCI_HIV_1_Nef_Negative_effector_of_Fas_and_TNF_alpha_Pathway_(Pathway_degradation_of_CASP3_CASP7_CASP6)	NCI 1.2	0.0655922	0.0809546
1324	biocarta_role_of_nicotinic_acetylcholine_receptors_in_the_regulation_of_apoptosis_Main_Pathway	Biocarta 1.2	0.0655653	0.0809546
1864	reactome_NCAM1_interactions_Main_Pathway	Reactome 1.3	0.0656365	0.0809666
369	NCI_Aurora_B_signaling_Main_Pathway	NCI 1.2	0.0664039	0.0818272
435	NCI_Caspase_Cascade_in_Apoptosis_Pathway_(apoptosis)	NCI 1.2	0.0664039	0.0818272
1982	reactome_Prostanoid_ligand_receptors_Main_Pathway	Reactome 1.3	0.0673616	0.0829637
314	NCI_Alpha_synuclein_signaling_Main_Pathway	NCI 1.2	0.0682416	0.0834776
317	NCI_Alpha_synuclein_signaling_Pathway_(Pathway_negative_regulation_of_transcription_via_TOR1A_SNCA_STUB1_FKBP1A)	NCI 1.2	0.0682416	0.0834776
319	NCI_Alpha_synuclein_signaling_Pathway_(Pathway_positive_regulation_of_gene_specific_transcription_via_TOR1A_SNCA_FKBP1A_STUB1)	NCI 1.2	0.0682416	0.0834776
320	NCI_Alpha_synuclein_signaling_Pathway_(cell_death)	NCI 1.2	0.0682416	0.0834776
321	NCI_Alpha_synuclein_signaling_Pathway_(neuron_apoptosis)	NCI 1.2	0.0682416	0.0834776
322	NCI_Alpha_synuclein_signaling_Pathway_(proteasomal_ubiquitin_dependent_protein_catabolic_process)	NCI 1.2	0.0682416	0.0834776
323	NCI_Alpha_synuclein_signaling_Pathway_(protein_targeting_to_lysosome)	NCI 1.2	0.0682416	0.0834776
486	NCI_EPHA_forward_signaling_Main_Pathway	NCI 1.2	0.0682416	0.0834776
490	NCI_EPHA_forward_signaling_Pathway_(proteasomal_ubiquitin_dependent_protein_catabolic_process)	NCI 1.2	0.0682416	0.0834776
782	NCI_PDGFR_beta_signaling_Pathway_(cell_migration)	NCI 1.2	0.0682416	0.0834776
783	NCI_PDGFR_beta_signaling_Pathway_(chemotaxis)	NCI 1.2	0.0682416	0.0834776
859	NCI_Regulation_of_p38_alpha_and_p38_beta_Main_Pathway	NCI 1.2	0.0682416	0.0834776
860	NCI_Regulation_of_p38_alpha_and_p38_beta_Pathway_(positive_regulation_of_innate_immune_response)	NCI 1.2	0.0682416	0.0834776
1682	reactome_Fc_epsilon_receptor_FCERI_signaling_Main_Pathway	Reactome 1.3	0.0683299	0.0835421
142	KEGG_MAPK_signaling_Main_Pathway	KEGG Adjusted 1.4	0.0685962	0.0838239
131	KEGG_Jak_STAT_signaling_Main_Pathway	KEGG Adjusted 1.4	0.0693416	0.0846906
975	NCI_Syndecan_4_mediated_signaling_events_Main_Pathway	NCI 1.2	0.0704203	0.0859634
1720	reactome_G_alpha_q_signalling_events_Main_Pathway	Reactome 1.3	0.0706	0.0861378
977	NCI_TCR_signaling_in_naive_CD4_T_cells_Main_Pathway	NCI 1.2	0.0720138	0.0878171
2071	reactome_Retinoid_metabolism_and_transport_Main_Pathway	Reactome 1.3	0.0721333	0.0879172
217	KEGG_Ras_signaling_Main_Pathway	KEGG Adjusted 1.4	0.0756482	0.0921532
1550	reactome_Cation_coupled_Chloride_cotransporters_Main_Pathway	Reactome 1.3	0.0766258	0.0932957
1184	biocarta_il12_and_stat4_dependent_signaling_pathway_in_th1_development_Main_Pathway	Biocarta 1.2	0.0768933	0.0935243
1247	biocarta_no2_dependent_il_12_pathway_in_nk_cells_Main_Pathway	Biocarta 1.2	0.0768933	0.0935243
626	NCI_IL23_mediated_signaling_events_Main_Pathway	NCI 1.2	0.0793809	0.0964998
120	KEGG_Histidine_metabolism_Main_Pathway	KEGG Adjusted 1.4	0.0799315	0.0970685
1766	reactome_Histidine_catabolism_Main_Pathway	Reactome 1.3	0.0799315	0.0970685
238	KEGG_Sphingolipid_signaling_Main_Pathway	KEGG Adjusted 1.4	0.0806516	0.0976952
453	NCI_Ceramide_signaling_Pathway_(cell_survival)	NCI 1.2	0.0808228	0.0976952
454	NCI_Ceramide_signaling_Pathway_(ganglioside_biosynthetic_process)	NCI 1.2	0.0808228	0.0976952
455	NCI_Ceramide_signaling_Pathway_(negative_regulation_of_cell_cycle)	NCI 1.2	0.0808228	0.0976952
1120	biocarta_ceramide_signaling_Main_Pathway	Biocarta 1.2	0.0808228	0.0976952
1121	biocarta_ceramide_signaling_Pathway_(Pathway_protein_ubiquitination_of_CHUK)	Biocarta 1.2	0.0808228	0.0976952
1170	biocarta_hiv_1_nef_negative_effector_of_fas_and_tnf_Pathway_(Pathway_protein_ubiquitination_of_CHUK)	Biocarta 1.2	0.0808228	0.0976952
1339	biocarta_sodd_tnfr1_signaling_Main_Pathway	Biocarta 1.2	0.0808228	0.0976952
1371	biocarta_tnfr1_signaling_Main_Pathway	Biocarta 1.2	0.0808228	0.0976952
2342	reactome_temp_Immunoregulatory_interactions_between_a_Lymphoid_and_a_non-Lymphoid_cell	Reactome 1.3	0.0808641	0.0976952
2186	reactome_Synthesis_of_Prostaglandins_PG_and_Thromboxanes_TX__Main_Pathway	Reactome 1.3	0.0815893	0.0985205
1793	reactome_Insulin_like_Growth_Factor_2_mRNA_Binding_Proteins_IGF2BPs_IMPs_VICKZs_bind_RNA_Main_Pathway	Reactome 1.3	0.08271	0.0998224
757	NCI_Notch_signaling_Main_Pathway	NCI 1.2	0.0835073	0.100601
758	NCI_Notch_signaling_Pathway_(Bergmann_glial_cell_differentiation)	NCI 1.2	0.0835073	0.100601
759	NCI_Notch_signaling_Pathway_(oligodendrocyte_development)	NCI 1.2	0.0835073	0.100601
1984	reactome_Proton_oligopeptide_cotransporters_Main_Pathway	Reactome 1.3	0.0835269	0.100601
47	KEGG_Choline_metabolism_in_cancer_Main_Pathway	KEGG Adjusted 1.4	0.0855332	0.102596
49	KEGG_Chronic_myeloid_leukemia_Main_Pathway	KEGG Adjusted 1.4	0.0855332	0.102596
55	KEGG_Colorectal_cancer_Main_Pathway	KEGG Adjusted 1.4	0.0855332	0.102596
72	KEGG_Endometrial_cancer_Main_Pathway	KEGG Adjusted 1.4	0.0855332	0.102596
74	KEGG_Epstein_Barr_virus_infection_Main_Pathway	KEGG Adjusted 1.4	0.0855332	0.102596
179	KEGG_Pancreatic_cancer_Main_Pathway	KEGG Adjusted 1.4	0.0855332	0.102596
192	KEGG_Phosphatidylinositol_signaling_system_Main_Pathway	KEGG Adjusted 1.4	0.0855332	0.102596
221	KEGG_Renal_cell_carcinoma_Main_Pathway	KEGG Adjusted 1.4	0.0855332	0.102596
1481	reactome_Androgen_biosynthesis_Main_Pathway	Reactome 1.3	0.0856464	0.10262
1539	reactome_CS_DS_degradation_Main_Pathway	Reactome 1.3	0.0857284	0.10262
1614	reactome_Dermatan_sulfate_biosynthesis_Main_Pathway	Reactome 1.3	0.0857284	0.10262
1914	reactome_Opioid_Signalling_Main_Pathway	Reactome 1.3	0.0856464	0.10262
237	KEGG_Sphingolipid_metabolism_Main_Pathway	KEGG Adjusted 1.4	0.0869485	0.10371
876	NCI_S1P1_Main_Pathway	NCI 1.2	0.0869485	0.10371
879	NCI_S1P1_Pathway_(receptor_internalization)	NCI 1.2	0.0869485	0.10371
1260	biocarta_phospholipids_as_signalling_intermediaries_Pathway_(actin_filament_organization)	Biocarta 1.2	0.0869485	0.10371
1263	biocarta_phospholipids_as_signalling_intermediaries_Pathway_(chemotaxis)	Biocarta 1.2	0.0869485	0.10371
1264	biocarta_phospholipids_as_signalling_intermediaries_Pathway_(lamellipodium_assembly)	Biocarta 1.2	0.0869485	0.10371
2158	reactome_Sphingolipid_de_novo_biosynthesis_Main_Pathway	Reactome 1.3	0.0869485	0.10371
163	KEGG_Non_alcoholic_fatty_liver_disease_NAFLD__Main_Pathway	KEGG Adjusted 1.4	0.0874077	0.104152
437	NCI_Caspase_Cascade_in_Apoptosis_Pathway_(neuron_apoptosis)	NCI 1.2	0.0874077	0.104152
1949	reactome_Phenylalanine_and_tyrosine_catabolism_Main_Pathway	Reactome 1.3	0.0890139	0.106012
216	KEGG_Rap1_signaling_Main_Pathway	KEGG Adjusted 1.4	0.0891214	0.106086
85	KEGG_Focal_adhesion_Main_Pathway	KEGG Adjusted 1.4	0.0910166	0.108232
689	NCI_JNK_signaling_in_the_CD4_TCR_Main_Pathway	NCI 1.2	0.0910079	0.108232
194	KEGG_Platelet_activation_Main_Pathway	KEGG Adjusted 1.4	0.0921233	0.109493
2142	reactome_Signaling_by_SCF_KIT_Main_Pathway	Reactome 1.3	0.0940135	0.111683
952	NCI_Sphingosine_1_phosphate_S1P_Main_Pathway	NCI 1.2	0.0959146	0.113883
209	KEGG_Purine_metabolism_Main_Pathway	KEGG Adjusted 1.4	0.0959804	0.113904
441	NCI_Cellular_roles_of_Anthrax_toxin_Pathway_(MAPKKK_cascade)	NCI 1.2	0.0971003	0.114635
442	NCI_Cellular_roles_of_Anthrax_toxin_Pathway_(apoptosis)	NCI 1.2	0.0971003	0.114635
443	NCI_Cellular_roles_of_Anthrax_toxin_Pathway_(inflammatory_response)	NCI 1.2	0.0971003	0.114635
444	NCI_Cellular_roles_of_Anthrax_toxin_Pathway_(macrophage_activation)	NCI 1.2	0.0971003	0.114635
446	NCI_Cellular_roles_of_Anthrax_toxin_Pathway_(necrosis)	NCI 1.2	0.0971003	0.114635
447	NCI_Cellular_roles_of_Anthrax_toxin_Pathway_(negative_regulation_of_macrophage_activation)	NCI 1.2	0.0971003	0.114635
448	NCI_Cellular_roles_of_Anthrax_toxin_Pathway_(negative_regulation_of_myeloid_dendritic_cell_antigen_processing_and_presentation)	NCI 1.2	0.0971003	0.114635
449	NCI_Cellular_roles_of_Anthrax_toxin_Pathway_(negative_regulation_of_phagocytosis)	NCI 1.2	0.0971003	0.114635
450	NCI_Cellular_roles_of_Anthrax_toxin_Pathway_(platelet_activation)	NCI 1.2	0.0971003	0.114635
451	NCI_Cellular_roles_of_Anthrax_toxin_Pathway_(regulation_of_endothelial_cell_proliferation)	NCI 1.2	0.0971003	0.114635
644	NCI_IL2_mediated_signaling_events_Pathway_(T_cell_proliferation)	NCI 1.2	0.0971344	0.114635
2137	reactome_Signaling_by_Leptin_Main_Pathway	Reactome 1.3	0.0983681	0.116033
69	KEGG_ECM_receptor_interaction_Main_Pathway	KEGG Adjusted 1.4	0.0990231	0.116747
376	NCI_BCR_signaling_Main_Pathway	NCI 1.2	0.0995759	0.117339
1780	reactome_IRF3_mediated_induction_of_type_I_IFN_Main_Pathway	Reactome 1.3	0.102178	0.120285
2106	reactome_STING_mediated_induction_of_host_immune_responses_Main_Pathway	Reactome 1.3	0.102178	0.120285
1812	reactome_Intrinsic_Pathway_Main_Pathway	Reactome 1.3	0.105821	0.124511
414	NCI_CXCR4_mediated_signaling_events_Main_Pathway	NCI 1.2	0.106641	0.125413
605	NCI_HIV_1_Nef_Negative_effector_of_Fas_and_TNF_alpha_Pathway_(protein_ubiquitination)	NCI 1.2	0.107034	0.125812
2288	reactome_Vasopressin_like_receptors_Main_Pathway	Reactome 1.3	0.10735	0.12612
134	KEGG_Leukocyte_transendothelial_migration_Main_Pathway	KEGG Adjusted 1.4	0.108582	0.127504
1817	reactome_Keratan_sulfate_biosynthesis_Main_Pathway	Reactome 1.3	0.111164	0.13047
656	NCI_IL4_mediated_signaling_events_Main_Pathway	NCI 1.2	0.112743	0.132192
2234	reactome_Tie2_Signaling_Main_Pathway	Reactome 1.3	0.112743	0.132192
269	KEGG_Ubiquitin_mediated_proteolysis_Main_Pathway	KEGG Adjusted 1.4	0.11601	0.135953
517	NCI_Endogenous_TLR_signaling_Pathway_(regulation_of_granulocyte_colony_stimulating_factor_production)	NCI 1.2	0.117789	0.1379
518	NCI_Endogenous_TLR_signaling_Pathway_(regulation_of_interleukin_10_production)	NCI 1.2	0.117789	0.1379
234	KEGG_Shigellosis_Main_Pathway	KEGG Adjusted 1.4	0.118359	0.138499
2185	reactome_Synthesis_of_PIPs_at_the_plasma_membrane_Main_Pathway	Reactome 1.3	0.118785	0.138928
1157	biocarta_fmlp_induced_chemokine_gene_expression_in_hmc_1_cells_Main_Pathway	Biocarta 1.2	0.120554	0.140927
1036	NCI_amb2_Integrin_signaling_Main_Pathway	NCI 1.2	0.121371	0.141811
417	NCI_CXCR4_mediated_signaling_events_Pathway_(cell_proliferation)	NCI 1.2	0.121558	0.141889
419	NCI_CXCR4_mediated_signaling_events_Pathway_(establishment_of_cell_polarity)	NCI 1.2	0.121558	0.141889
197	KEGG_Primary_immunodeficiency_Main_Pathway	KEGG Adjusted 1.4	0.122268	0.142646
980	NCI_TCR_signaling_in_naive_CD8_T_cells_Pathway_(Pathway_regulation_of_survival_gene_product_expression_via_AKT1)	NCI 1.2	0.122399	0.142728
1430	reactome_Activated_point_mutants_of_FGFR2_Main_Pathway	Reactome 1.3	0.124747	0.145249
1669	reactome_FGFR2b_ligand_binding_and_activation_Main_Pathway	Reactome 1.3	0.124747	0.145249
2135	reactome_Signaling_by_FGFR_mutants_Main_Pathway	Reactome 1.3	0.124747	0.145249
2167	reactome_Synthesis_of_16_20_hydroxyeicosatetraenoic_acids_HETE__Main_Pathway	Reactome 1.3	0.125843	0.146453
1915	reactome_Opsins_Main_Pathway	Reactome 1.3	0.127586	0.148407
418	NCI_CXCR4_mediated_signaling_events_Pathway_(chemotaxis)	NCI 1.2	0.128987	0.149962
1732	reactome_Glucagon_like_Peptide_1_GLP1_regulates_insulin_secretion_Main_Pathway	Reactome 1.3	0.130066	0.151067
2289	reactome_Vasopressin_regulates_renal_water_homeostasis_via_Aquaporins_Main_Pathway	Reactome 1.3	0.130066	0.151067
2125	reactome_Signal_regulatory_protein_SIRP_family_interactions_Main_Pathway	Reactome 1.3	0.130604	0.151618
1028	NCI_a4b7_Integrin_signaling_Main_Pathway	NCI 1.2	0.131467	0.152543
313	NCI_AlphaE_beta7_integrin_cell_surface_interactions_Main_Pathway	NCI 1.2	0.1316	0.152622
1159	biocarta_g_protein_signaling_through_tubby_proteins_Main_Pathway	Biocarta 1.2	0.132907	0.154062
430	NCI_Caspase_Cascade_in_Apoptosis_Main_Pathway	NCI 1.2	0.133123	0.154235
17	KEGG_Antigen_processing_and_presentation_Main_Pathway	KEGG Adjusted 1.4	0.133395	0.154472
158	KEGG_Neuroactive_ligand_receptor_interaction_Main_Pathway	KEGG Adjusted 1.4	0.133459	0.154472
1713	reactome_GPVI_mediated_activation_cascade_Main_Pathway	Reactome 1.3	0.134115	0.155155
1478	reactome_Amino_acid_transport_across_the_plasma_membrane_Main_Pathway	Reactome 1.3	0.134429	0.155365
1881	reactome_Na_Cl_dependent_neurotransmitter_transporters_Main_Pathway	Reactome 1.3	0.134429	0.155365
1323	biocarta_role_of_mitochondria_in_apoptotic_signaling_Main_Pathway	Biocarta 1.2	0.134928	0.155789
1872	reactome_NOD1_2_Signaling_Pathway_Main_Pathway	Reactome 1.3	0.134928	0.155789
1158	biocarta_fmlp_induced_chemokine_gene_expression_in_hmc_1_cells_Pathway_(Pathway_degradation_of_PRKCA)	Biocarta 1.2	0.151104	0.174379
1655	reactome_Ephrin_signaling_Main_Pathway	Reactome 1.3	0.151474	0.174721
378	NCI_BCR_signaling_Pathway_(cell_survival)	NCI 1.2	0.151706	0.17473
380	NCI_BCR_signaling_Pathway_(re_entry_into_mitotic_cell_cycle)	NCI 1.2	0.151706	0.17473
1859	reactome_MyD88_Mal_cascade_initiated_on_plasma_membrane_Main_Pathway	Reactome 1.3	0.151706	0.17473
1403	reactome_ADP_signalling_through_P2Y_purinoceptor_12_Main_Pathway	Reactome 1.3	0.155014	0.178453
480	NCI_Downstream_signaling_in_naive_CD8_T_cells_Main_Pathway	NCI 1.2	0.155391	0.178798
223	KEGG_Retinol_metabolism_Main_Pathway	KEGG Adjusted 1.4	0.155851	0.17924
1799	reactome_Integrin_alphaIIb_beta3_signaling_Main_Pathway	Reactome 1.3	0.156201	0.179554
481	NCI_Downstream_signaling_in_naive_CD8_T_cells_Pathway_(Pathway_regulation_of_survival_gene_product_expression_via_IL2RG)	NCI 1.2	0.156334	0.17962
1617	reactome_Digestion_of_dietary_lipid_Main_Pathway	Reactome 1.3	0.158002	0.181447
168	KEGG_Olfactory_transduction_Main_Pathway	KEGG Adjusted 1.4	0.159694	0.1833
10	KEGG_Allograft_rejection_Main_Pathway	KEGG Adjusted 1.4	0.16886	0.192878
566	NCI_FAS_CD95_signaling_Pathway_(cell_migration)	NCI 1.2	0.16886	0.192878
567	NCI_FAS_CD95_signaling_Pathway_(necroptosis)	NCI 1.2	0.16886	0.192878
568	NCI_FAS_CD95_signaling_Pathway_(neuron_projection_development)	NCI 1.2	0.16886	0.192878
569	NCI_FAS_CD95_signaling_Pathway_(release_of_cytochrome_c_from_mitochondria)	NCI 1.2	0.16886	0.192878
1153	biocarta_fas_signaling_pathway_cd95__Main_Pathway	Biocarta 1.2	0.16886	0.192878
1618	reactome_Dimerization_of_procaspase_8_Main_Pathway	Reactome 1.3	0.16886	0.192878
1654	reactome_Endosomal_Vacuolar_Main_Pathway	Reactome 1.3	0.168703	0.192878
1678	reactome_FasL_CD95L_signaling_Main_Pathway	Reactome 1.3	0.16886	0.192878
2031	reactome_Regulation_by_c_FLIP_Main_Pathway	Reactome 1.3	0.16886	0.192878
117	KEGG_Hepatitis_C_Main_Pathway	KEGG Adjusted 1.4	0.171225	0.194914
427	NCI_Canonical_NF_kappaB_Main_Pathway	NCI 1.2	0.171225	0.194914
895	NCI_Signaling_events_mediated_by_HDAC_Class_I_Main_Pathway	NCI 1.2	0.171225	0.194914
1214	biocarta_keratinocyte_differentiation_Pathway_(Pathway_protein_ubiquitination_of_CHUK)	Biocarta 1.2	0.171225	0.194914
1352	biocarta_stress_induction_of_hsp_regulation_Pathway_(Pathway_degradation_of_HSPB1)	Biocarta 1.2	0.171225	0.194914
1353	biocarta_stress_induction_of_hsp_regulation_Pathway_(cell_survival)	Biocarta 1.2	0.171225	0.194914
1370	biocarta_tnf_stress_related_signaling_Main_Pathway	Biocarta 1.2	0.171225	0.194914
1171	biocarta_hop_pathway_in_cardiac_development_Main_Pathway	Biocarta 1.2	0.171618	0.195078
1172	biocarta_hop_pathway_in_cardiac_development_Pathway_(cell_differentiation)	Biocarta 1.2	0.171618	0.195078
1173	biocarta_hop_pathway_in_cardiac_development_Pathway_(cell_proliferation)	Biocarta 1.2	0.171618	0.195078
1701	reactome_Formyl_peptide_receptors_bind_formyl_peptides_and_many_other_ligands_Main_Pathway	Reactome 1.3	0.171709	0.195086
1639	reactome_EPH_ephrin_mediated_repulsion_of_cells_Main_Pathway	Reactome 1.3	0.180742	0.205249
145	KEGG_Measles_Main_Pathway	KEGG Adjusted 1.4	0.18106	0.205512
1152	biocarta_extrinsic_prothrombin_activation_Main_Pathway	Biocarta 1.2	0.182017	0.206497
288	NCI_ALK1_signaling_events_Main_Pathway	NCI 1.2	0.18261	0.20687
981	NCI_TGF_beta_receptor_signaling_Main_Pathway	NCI 1.2	0.18261	0.20687
1358	biocarta_tgf_beta_signaling_Main_Pathway	Biocarta 1.2	0.18261	0.20687
1959	reactome_Platelet_Aggregation_Plug_Formation__Main_Pathway	Reactome 1.3	0.183037	0.207253
235	KEGG_Signaling_pathways_regulating_pluripotency_of_stem_cells_Main_Pathway	KEGG Adjusted 1.4	0.185171	0.209367
1939	reactome_POU5F1_OCT4_SOX2_NANOG_repress_genes_related_to_differentiation_Main_Pathway	Reactome 1.3	0.185171	0.209367
2251	reactome_Transcriptional_regulation_of_pluripotent_stem_cells_Main_Pathway	Reactome 1.3	0.185171	0.209367
840	NCI_Ras_signaling_in_the_CD4_TCR_Main_Pathway	NCI 1.2	0.193847	0.219071
20	KEGG_Arginine_and_proline_metabolism_Main_Pathway	KEGG Adjusted 1.4	0.196396	0.221631
109	KEGG_Glyoxylate_and_dicarboxylate_metabolism_Main_Pathway	KEGG Adjusted 1.4	0.196396	0.221631
854	NCI_Regulation_of_nuclear_SMAD2_3_signaling_Main_Pathway	NCI 1.2	0.196394	0.221631
1299	biocarta_reversal_of_insulin_resistance_by_leptin_Main_Pathway	Biocarta 1.2	0.205899	0.232019
1300	biocarta_reversal_of_insulin_resistance_by_leptin_Pathway_(fatty_acid_oxidation)	Biocarta 1.2	0.205899	0.232019
2198	reactome_Synthesis_secretion_and_inactivation_of_Glucagon_like_Peptide_1_GLP_1__Main_Pathway	Reactome 1.3	0.205899	0.232019
280	KEGG_Wnt_signaling_Main_Pathway	KEGG Adjusted 1.4	0.206629	0.232731
1620	reactome_Dissolution_of_Fibrin_Clot_Main_Pathway	Reactome 1.3	0.206859	0.232878
1515	reactome_Bicarbonate_transporters_Main_Pathway	Reactome 1.3	0.209984	0.236282
283	KEGG_cAMP_signaling_Main_Pathway	KEGG Adjusted 1.4	0.210562	0.236819
1520	reactome_Branched_chain_amino_acid_catabolism_Main_Pathway	Reactome 1.3	0.214344	0.240957
1664	reactome_FCERI_mediated_MAPK_activation_Main_Pathway	Reactome 1.3	0.215094	0.241685
1129	biocarta_ctcf_first_multivalent_nuclear_factor_Main_Pathway	Biocarta 1.2	0.216858	0.24355
2079	reactome_Role_of_DCC_in_regulating_apoptosis_Main_Pathway	Reactome 1.3	0.217208	0.243826
660	NCI_IL5_mediated_signaling_events_Main_Pathway	NCI 1.2	0.21904	0.245531
661	NCI_IL5_mediated_signaling_events_Pathway_(proteasomal_ubiquitin_dependent_protein_catabolic_process)	NCI 1.2	0.21904	0.245531
662	NCI_IL5_mediated_signaling_events_Pathway_(regulation_of_isotype_switching_to_IgG_isotypes)	NCI 1.2	0.21904	0.245531
976	NCI_Syndecan_4_mediated_signaling_events_Pathway_(cell_migration)	NCI 1.2	0.219918	0.246397
1484	reactome_Antigen_processing_Ubiquitination_Proteasome_degradation_Main_Pathway	Reactome 1.3	0.225755	0.252815
2123	reactome_Sialic_acid_metabolism_Main_Pathway	Reactome 1.3	0.227318	0.254444
452	NCI_Ceramide_signaling_Main_Pathway	NCI 1.2	0.230193	0.257539
1843	reactome_Metal_ion_SLC_transporters_Main_Pathway	Reactome 1.3	0.236778	0.26478
825	NCI_Presenilin_action_in_Notch_and_Wnt_signaling_Main_Pathway	NCI 1.2	0.239456	0.266884
826	NCI_Presenilin_action_in_Notch_and_Wnt_signaling_Pathway_(Pathway_degradation_of_CTNNB1)	NCI 1.2	0.239456	0.266884
827	NCI_Presenilin_action_in_Notch_and_Wnt_signaling_Pathway_(apoptosis)	NCI 1.2	0.239456	0.266884
1199	biocarta_inactivation_of_gsk3_by_akt_causes_accumulation_of_b_catenin_in_alveolar_macrophages_Main_Pathway	Biocarta 1.2	0.239456	0.266884
1236	biocarta_multi_step_regulation_of_transcription_by_pitx2_Main_Pathway	Biocarta 1.2	0.239456	0.266884
1332	biocarta_segmentation_clock_Main_Pathway	Biocarta 1.2	0.239456	0.266884
1397	biocarta_wnt_signaling_Main_Pathway	Biocarta 1.2	0.239456	0.266884
1818	reactome_Keratan_sulfate_degradation_Main_Pathway	Reactome 1.3	0.243385	0.271134
43	KEGG_Central_carbon_metabolism_in_cancer_Main_Pathway	KEGG Adjusted 1.4	0.246732	0.274732
243	KEGG_Steroid_hormone_biosynthesis_Main_Pathway	KEGG Adjusted 1.4	0.247314	0.275249
159	KEGG_Neurotrophin_signaling_Main_Pathway	KEGG Adjusted 1.4	0.247501	0.275327
1674	reactome_FMO_oxidizes_nucleophiles_Main_Pathway	Reactome 1.3	0.252095	0.280305
2166	reactome_Synthesis_of_15_eicosatetraenoic_acid_derivatives_Main_Pathway	Reactome 1.3	0.25555	0.284012
462	NCI_Class_I_PI3K_signaling_events_Main_Pathway	NCI 1.2	0.264234	0.293524
1154	biocarta_fc_epsilon_receptor_i_signaling_in_mast_cells_Main_Pathway	Biocarta 1.2	0.267567	0.296945
1156	biocarta_fc_epsilon_receptor_i_signaling_in_mast_cells_Pathway_(degranulation)	Biocarta 1.2	0.267567	0.296945
564	NCI_FAS_CD95_signaling_Main_Pathway	NCI 1.2	0.268083	0.297377
1588	reactome_Cross_presentation_of_particulate_exogenous_antigens_phagosomes__Main_Pathway	Reactome 1.3	0.269648	0.298972
1356	biocarta_t_cell_receptor_signaling_Main_Pathway	Biocarta 1.2	0.270086	0.299316
642	NCI_IL2_mediated_signaling_events_Main_Pathway	NCI 1.2	0.27125	0.300463
76	KEGG_Estrogen_signaling_Main_Pathway	KEGG Adjusted 1.4	0.272801	0.302039
416	NCI_CXCR4_mediated_signaling_events_Pathway_(cell_adhesion)	NCI 1.2	0.275341	0.304707
680	NCI_Integrin_linked_kinase_signaling_Pathway_(DNA_biosynthetic_process)	NCI 1.2	0.279315	0.308813
683	NCI_Integrin_linked_kinase_signaling_Pathway_(centrosome_localization)	NCI 1.2	0.279315	0.308813
1186	biocarta_il_2_receptor_beta_chain_in_t_cell_activation_Main_Pathway	Biocarta 1.2	0.285664	0.315684
1752	reactome_HDL_mediated_lipid_transport_Main_Pathway	Reactome 1.3	0.285835	0.315724
1476	reactome_Amino_acid_and_oligopeptide_SLC_transporters_Main_Pathway	Reactome 1.3	0.287168	0.31675
1494	reactome_Astrocytic_Glutamate_Glutamine_Uptake_And_Metabolism_Main_Pathway	Reactome 1.3	0.287168	0.31675
2263	reactome_Transport_of_inorganic_cations_anions_and_amino_acids_oligopeptides_Main_Pathway	Reactome 1.3	0.287168	0.31675
18	KEGG_Apoptosis_Main_Pathway	KEGG Adjusted 1.4	0.288898	0.318358
1586	reactome_Costimulation_by_the_CD28_family_Main_Pathway	Reactome 1.3	0.288883	0.318358
851	NCI_Regulation_of_Telomerase_Main_Pathway	NCI 1.2	0.294659	0.324554
89	KEGG_GABAergic_synapse_Main_Pathway	KEGG Adjusted 1.4	0.297052	0.325812
1404	reactome_ADP_signalling_through_P2Y_purinoceptor_1_Main_Pathway	Reactome 1.3	0.297052	0.325812
1466	reactome_Adrenaline_noradrenaline_inhibits_insulin_secretion_Main_Pathway	Reactome 1.3	0.297052	0.325812
1542	reactome_Ca2_Main_Pathway	Reactome 1.3	0.297052	0.325812
1724	reactome_G_beta_gamma_signalling_through_PLC_beta_Main_Pathway	Reactome 1.3	0.297052	0.325812
1734	reactome_Glucagon_type_ligand_receptors_Main_Pathway	Reactome 1.3	0.297052	0.325812
1970	reactome_Presynaptic_function_of_Kainate_receptors_Main_Pathway	Reactome 1.3	0.297052	0.325812
1981	reactome_Prostacyclin_signalling_through_prostacyclin_receptor_Main_Pathway	Reactome 1.3	0.297052	0.325812
2232	reactome_Thromboxane_signalling_through_TP_receptor_Main_Pathway	Reactome 1.3	0.297052	0.325812
1733	reactome_Glucagon_signaling_in_metabolic_regulation_Main_Pathway	Reactome 1.3	0.297921	0.326613
272	KEGG_Valine_leucine_and_isoleucine_degradation_Main_Pathway	KEGG Adjusted 1.4	0.301851	0.330767
1393	biocarta_visceral_fat_deposits_and_the_metabolic_syndrome_Main_Pathway	Biocarta 1.2	0.303211	0.332101
1117	biocarta_cell_to_cell_adhesion_signaling_Main_Pathway	Biocarta 1.2	0.308428	0.337344
1118	biocarta_cell_to_cell_adhesion_signaling_Pathway_(cell_cell_adhesion)	Biocarta 1.2	0.308428	0.337344
1119	biocarta_cell_to_cell_adhesion_signaling_Pathway_(cell_migration)	Biocarta 1.2	0.308428	0.337344
193	KEGG_Phototransduction_Main_Pathway	KEGG Adjusted 1.4	0.311198	0.340215
26	KEGG_B_cell_receptor_signaling_Main_Pathway	KEGG Adjusted 1.4	0.316189	0.345285
532	NCI_Ephrin_B_reverse_signaling_Main_Pathway	NCI 1.2	0.316573	0.345285
533	NCI_Ephrin_B_reverse_signaling_Pathway_(angiogenesis)	NCI 1.2	0.316573	0.345285
534	NCI_Ephrin_B_reverse_signaling_Pathway_(cell_adhesion)	NCI 1.2	0.316573	0.345285
535	NCI_Ephrin_B_reverse_signaling_Pathway_(endothelial_cell_migration)	NCI 1.2	0.316573	0.345285
2223	reactome_The_AIM2_inflammasome_Main_Pathway	Reactome 1.3	0.32348	0.352655
984	NCI_TNF_receptor_signaling_pathway__Pathway_(JNK_cascade)	NCI 1.2	0.323986	0.353042
1195	biocarta_il_6_signaling_Main_Pathway	Biocarta 1.2	0.324439	0.353208
1809	reactome_Interleukin_6_signaling_Main_Pathway	Reactome 1.3	0.324439	0.353208
2227	reactome_The_canonical_retinoid_cycle_in_rods_twilight_vision__Main_Pathway	Reactome 1.3	0.32987	0.358953
1676	reactome_Facilitative_Na_independent_glucose_transporters_Main_Pathway	Reactome 1.3	0.332225	0.361349
2155	reactome_Sodium_coupled_sulphate_di_and_tri_carboxylate_transporters_Main_Pathway	Reactome 1.3	0.344061	0.374049
711	NCI_Lissencephaly_gene_LIS1_in_neuronal_migration_and_development_Main_Pathway	NCI 1.2	0.345287	0.375208
2113	reactome_Scavenging_of_heme_from_plasma_Main_Pathway	Reactome 1.3	0.350667	0.380877
1765	reactome_Histamine_receptors_Main_Pathway	Reactome 1.3	0.364397	0.395607
7	KEGG_Alanine_aspartate_and_glutamate_metabolism_Main_Pathway	KEGG Adjusted 1.4	0.372815	0.404559
1727	reactome_Gamma_carboxylation_of_protein_precursors_Main_Pathway	Reactome 1.3	0.378916	0.410799
2061	reactome_Removal_of_aminoterminal_propeptides_from_gamma_carboxylated_proteins_Main_Pathway	Reactome 1.3	0.378916	0.410799
1828	reactome_Ligand_gated_ion_channel_transport_Main_Pathway	Reactome 1.3	0.382043	0.413997
188	KEGG_Pertussis_Main_Pathway	KEGG Adjusted 1.4	0.382589	0.414398
230	KEGG_Salivary_secretion_Main_Pathway	KEGG Adjusted 1.4	0.385569	0.417433
1721	reactome_G_alpha_s_signalling_events_Main_Pathway	Reactome 1.3	0.386015	0.417723
1647	reactome_Eicosanoids_Main_Pathway	Reactome 1.3	0.386487	0.418041
326	NCI_Angiopoietin_receptor_Tie2_mediated_signaling_Main_Pathway	NCI 1.2	0.386927	0.418324
241	KEGG_Starch_and_sucrose_metabolism_Main_Pathway	KEGG Adjusted 1.4	0.392383	0.424026
36	KEGG_Butirosin_and_neomycin_biosynthesis_Main_Pathway	KEGG Adjusted 1.4	0.394313	0.425005
88	KEGG_Fructose_and_mannose_metabolism_Main_Pathway	KEGG Adjusted 1.4	0.394313	0.425005
90	KEGG_Galactose_metabolism_Main_Pathway	KEGG Adjusted 1.4	0.394313	0.425005
387	NCI_CD40_CD40L_signaling_Main_Pathway	NCI 1.2	0.395644	0.425005
388	NCI_CD40_CD40L_signaling_Pathway_(B_cell_affinity_maturation)	NCI 1.2	0.395644	0.425005
389	NCI_CD40_CD40L_signaling_Pathway_(B_cell_proliferation)	NCI 1.2	0.395644	0.425005
390	NCI_CD40_CD40L_signaling_Pathway_(plasma_cell_differentiation)	NCI 1.2	0.395644	0.425005
391	NCI_CD40_CD40L_signaling_Pathway_(proteasomal_ubiquitin_dependent_protein_catabolic_process)	NCI 1.2	0.395644	0.425005
392	NCI_CD40_CD40L_signaling_Pathway_(regulation_of_germinal_center_formation)	NCI 1.2	0.395644	0.425005
393	NCI_CD40_CD40L_signaling_Pathway_(regulation_of_isotype_switching_to_IgE_isotypes)	NCI 1.2	0.395644	0.425005
394	NCI_CD40_CD40L_signaling_Pathway_(regulation_of_isotype_switching_to_IgG_isotypes)	NCI 1.2	0.395644	0.425005
1110	biocarta_cd40l_signaling_Main_Pathway	Biocarta 1.2	0.395644	0.425005
1111	biocarta_cd40l_signaling_Pathway_(Pathway_protein_ubiquitination_of_TNFAIP3_MAP3K1_MAP4K4)	Biocarta 1.2	0.395644	0.425005
22	KEGG_Ascorbate_and_aldarate_metabolism_Main_Pathway	KEGG Adjusted 1.4	0.398333	0.427306
185	KEGG_Pentose_and_glucuronate_interconversions_Main_Pathway	KEGG Adjusted 1.4	0.398333	0.427306
1738	reactome_Glucuronidation_Main_Pathway	Reactome 1.3	0.398333	0.427306
631	NCI_IL23_mediated_signaling_events_Pathway_(positive_regulation_of_dendritic_cell_antigen_processing_and_presentation)	NCI 1.2	0.400498	0.429432
1684	reactome_Ficolins_bind_to_repetitive_carbohydrate_structures_on_the_target_cell_surface_Main_Pathway	Reactome 1.3	0.401152	0.429937
1213	biocarta_keratinocyte_differentiation_Main_Pathway	Biocarta 1.2	0.412973	0.442008
1259	biocarta_phospholipids_as_signalling_intermediaries_Main_Pathway	Biocarta 1.2	0.41298	0.442008
2284	reactome_VEGFR2_mediated_cell_proliferation_Main_Pathway	Reactome 1.3	0.41298	0.442008
57	KEGG_Cyanoamino_acid_metabolism_Main_Pathway	KEGG Adjusted 1.4	0.417917	0.446677
96	KEGG_Glutathione_metabolism_Main_Pathway	KEGG Adjusted 1.4	0.417917	0.446677
253	KEGG_Taurine_and_hypotaurine_metabolism_Main_Pathway	KEGG Adjusted 1.4	0.417917	0.446677
308	NCI_Alpha4_beta1_integrin_signaling_events_Pathway_(cell_migration)	NCI 1.2	0.418105	0.446677
44	KEGG_Chagas_disease_American_trypanosomiasis__Main_Pathway	KEGG Adjusted 1.4	0.420019	0.448449
625	NCI_IL1_mediated_signaling_events_Main_Pathway	NCI 1.2	0.420146	0.448449
1334	biocarta_signal_transduction_through_il1r_Main_Pathway	Biocarta 1.2	0.420602	0.448732
944	NCI_Signaling_events_regulated_by_Ret_tyrosine_kinase_Main_Pathway	NCI 1.2	0.42115	0.449112
493	NCI_EPO_signaling_Main_Pathway	NCI 1.2	0.425228	0.453254
2266	reactome_Transport_of_organic_anions_Main_Pathway	Reactome 1.3	0.428864	0.456923
264	KEGG_Tuberculosis_Main_Pathway	KEGG Adjusted 1.4	0.436038	0.464355
1469	reactome_Advanced_glycosylation_endproduct_receptor_signaling_Main_Pathway	Reactome 1.3	0.452901	0.481375
1995	reactome_RIP_mediated_NFkB_activation_via_ZBP1_Main_Pathway	Reactome 1.3	0.452901	0.481375
2200	reactome_TAK1_activates_NFkB_by_phosphorylation_and_activation_of_IKKs_complex_Main_Pathway	Reactome 1.3	0.452901	0.481375
2209	reactome_TRAF6_mediated_NF_kB_activation_Main_Pathway	Reactome 1.3	0.452901	0.481375
2213	reactome_TRP_channels_Main_Pathway	Reactome 1.3	0.453047	0.481375
1723	reactome_G_beta_gamma_signalling_through_PI3Kgamma_Main_Pathway	Reactome 1.3	0.453912	0.482076
189	KEGG_Phagosome_Main_Pathway	KEGG Adjusted 1.4	0.455664	0.483718
148	KEGG_Metabolism_of_xenobiotics_by_cytochrome_P450_Main_Pathway	KEGG Adjusted 1.4	0.462867	0.491142
155	KEGG_NOD_like_receptor_signaling_Main_Pathway	KEGG Adjusted 1.4	0.464662	0.492824
1016	NCI_Validated_targets_of_C_MYC_transcriptional_repression_Main_Pathway	NCI 1.2	0.465559	0.493552
92	KEGG_Gastric_acid_secretion_Main_Pathway	KEGG Adjusted 1.4	0.468912	0.496881
1562	reactome_Class_II_GLUTs_Main_Pathway	Reactome 1.3	0.469992	0.497801
68	KEGG_Drug_metabolism_other_enzymes_Main_Pathway	KEGG Adjusted 1.4	0.472156	0.499868
1067	biocarta_activation_of_csk_by_camp_dependent_protein_kinase_inhibits_signaling_through_the_t_cell_receptor_Main_Pathway	Biocarta 1.2	0.473638	0.50121
279	KEGG_Vitamin_digestion_and_absorption_Main_Pathway	KEGG Adjusted 1.4	0.474118	0.501492
100	KEGG_Glycolysis_Gluconeogenesis_Main_Pathway	KEGG Adjusted 1.4	0.476761	0.50406
1725	reactome_G_protein_activation_Main_Pathway	Reactome 1.3	0.477379	0.504486
54	KEGG_Collecting_duct_acid_secretion_Main_Pathway	KEGG Adjusted 1.4	0.479778	0.506108
175	KEGG_Oxidative_phosphorylation_Main_Pathway	KEGG Adjusted 1.4	0.479778	0.506108
1795	reactome_Insulin_receptor_recycling_Main_Pathway	Reactome 1.3	0.479778	0.506108
2253	reactome_Transferrin_endocytosis_and_recycling_Main_Pathway	Reactome 1.3	0.479778	0.506108
1760	reactome_Hedgehog_ligand_biogenesis_Main_Pathway	Reactome 1.3	0.484448	0.510805
1473	reactome_Alternative_complement_activation_Main_Pathway	Reactome 1.3	0.484715	0.510856
2231	reactome_Thrombin_signalling_through_proteinase_activated_receptors_PARs__Main_Pathway	Reactome 1.3	0.497081	0.523654
1737	reactome_Glucose_transport_Main_Pathway	Reactome 1.3	0.501367	0.527932
203	KEGG_Proteasome_Main_Pathway	KEGG Adjusted 1.4	0.507637	0.53167
610	NCI_IFN_gamma_Main_Pathway	NCI 1.2	0.507637	0.53167
611	NCI_IFN_gamma_Pathway_(Antibacterial_Response)	NCI 1.2	0.507637	0.53167
612	NCI_IFN_gamma_Pathway_(Antiviral_Response)	NCI 1.2	0.507637	0.53167
613	NCI_IFN_gamma_Pathway_(Immunoregulation)	NCI 1.2	0.507637	0.53167
614	NCI_IFN_gamma_Pathway_(antigen_processing_and_presentation_of_peptide_antigen_via_MHC_class_I)	NCI 1.2	0.507637	0.53167
615	NCI_IFN_gamma_Pathway_(antigen_processing_and_presentation_of_peptide_antigen_via_MHC_class_II)	NCI 1.2	0.507637	0.53167
616	NCI_IFN_gamma_Pathway_(apoptosis)	NCI 1.2	0.507637	0.53167
617	NCI_IFN_gamma_Pathway_(negative_regulation_of_cell_growth)	NCI 1.2	0.507637	0.53167
1122	biocarta_chaperones_modulate_interferon_signaling_Main_Pathway	Biocarta 1.2	0.507637	0.53167
1123	biocarta_chaperones_modulate_interferon_signaling_Pathway_(Pathway_protein_ubiquitination_of_DNAJA3)	Biocarta 1.2	0.507637	0.53167
1182	biocarta_ifn_gamma_signaling_Main_Pathway	Biocarta 1.2	0.507637	0.53167
103	KEGG_Glycosaminoglycan_biosynthesis_keratan_sulfate_Main_Pathway	KEGG Adjusted 1.4	0.51564	0.53981
621	NCI_IL12_signaling_mediated_by_STAT4_Main_Pathway	NCI 1.2	0.524592	0.548204
622	NCI_IL12_signaling_mediated_by_STAT4_Pathway_(T_helper_1_cell_differentiation)	NCI 1.2	0.524592	0.548204
623	NCI_IL12_signaling_mediated_by_STAT4_Pathway_(T_helper_2_cell_differentiation)	NCI 1.2	0.524592	0.548204
624	NCI_IL12_signaling_mediated_by_STAT4_Pathway_(natural_killer_cell_mediated_cytotoxicity)	NCI 1.2	0.524592	0.548204
1386	biocarta_tsp_1_induced_apoptosis_in_microvascular_endothelial_cell_Main_Pathway	Biocarta 1.2	0.526011	0.549441
204	KEGG_Protein_digestion_and_absorption_Main_Pathway	KEGG Adjusted 1.4	0.528023	0.551297
422	NCI_C_MYB_transcription_factor_network_Main_Pathway	NCI 1.2	0.545899	0.569708
1108	biocarta_caspase_cascade_in_apoptosis_Main_Pathway	Biocarta 1.2	0.551165	0.574692
1109	biocarta_caspase_cascade_in_apoptosis_Pathway_(Pathway_degradation_of_CASP1_CASP3_CASP4_CASP10_GZMB)	Biocarta 1.2	0.551165	0.574692
41	KEGG_Cell_adhesion_molecules_CAMs__Main_Pathway	KEGG Adjusted 1.4	0.561261	0.584959
118	KEGG_Herpes_simplex_infection_Main_Pathway	KEGG Adjusted 1.4	0.566732	0.590399
177	KEGG_PI3K_Akt_signaling_Main_Pathway	KEGG Adjusted 1.4	0.567588	0.591027
67	KEGG_Drug_metabolism_cytochrome_P450_Main_Pathway	KEGG Adjusted 1.4	0.575594	0.599098
233	KEGG_Serotonergic_synapse_Main_Pathway	KEGG Adjusted 1.4	0.581524	0.605002
1807	reactome_Interleukin_1_signaling_Main_Pathway	Reactome 1.3	0.592428	0.616073
161	KEGG_Nicotine_addiction_Main_Pathway	KEGG Adjusted 1.4	0.594501	0.617681
1161	biocarta_gamma_aminobutyric_acid_receptor_life_cycle_Main_Pathway	Biocarta 1.2	0.594501	0.617681
105	KEGG_Glycosphingolipid_biosynthesis_ganglio_series_Main_Pathway	KEGG Adjusted 1.4	0.600179	0.623303
912	NCI_Signaling_events_mediated_by_Stem_cell_factor_receptor_c_Kit__Pathway_(cell_migration)	NCI 1.2	0.614074	0.63717
2130	reactome_Signaling_by_ERBB2_Main_Pathway	Reactome 1.3	0.614074	0.63717
1758	reactome_HS_GAG_biosynthesis_Main_Pathway	Reactome 1.3	0.615171	0.638026
1447	reactome_Activation_of_RAS_in_B_cells_Main_Pathway	Reactome 1.3	0.617123	0.639202
1646	reactome_Effects_of_PIP2_hydrolysis_Main_Pathway	Reactome 1.3	0.617123	0.639202
2018	reactome_Rap1_signalling_Main_Pathway	Reactome 1.3	0.617123	0.639202
890	NCI_SHP2_signaling_Main_Pathway	NCI 1.2	0.61873	0.640583
113	KEGG_HTLV_I_infection_Main_Pathway	KEGG Adjusted 1.4	0.62125	0.642909
2039	reactome_Regulation_of_IFNG_signaling_Main_Pathway	Reactome 1.3	0.621924	0.643323
1735	reactome_Glucocorticoid_biosynthesis_Main_Pathway	Reactome 1.3	0.62592	0.64717
1745	reactome_Glycosphingolipid_metabolism_Main_Pathway	Reactome 1.3	0.632141	0.653027
2226	reactome_The_activation_of_arylsulfatases_Main_Pathway	Reactome 1.3	0.632141	0.653027
2122	reactome_Serotonin_receptors_Main_Pathway	Reactome 1.3	0.634311	0.65498
885	NCI_S1P4_Main_Pathway	NCI 1.2	0.636368	0.656237
886	NCI_S1P4_Pathway_(cell_migration)	NCI 1.2	0.636368	0.656237
1834	reactome_Lysosphingolipid_and_LPA_receptors_Main_Pathway	Reactome 1.3	0.636368	0.656237
1483	reactome_Antigen_activates_B_Cell_Receptor_BCR_leading_to_generation_of_second_messengers_Main_Pathway	Reactome 1.3	0.637122	0.656726
1350	biocarta_stathmin_and_breast_cancer_resistance_to_antimicrotubule_agents_Main_Pathway	Biocarta 1.2	0.639866	0.659265
4	KEGG_Adipocytokine_signaling_Main_Pathway	KEGG Adjusted 1.4	0.645697	0.66498
1772	reactome_Hydroxycarboxylic_acid_binding_receptors_Main_Pathway	Reactome 1.3	0.652354	0.671394
1827	reactome_Leukotriene_receptors_Main_Pathway	Reactome 1.3	0.652497	0.671394
1845	reactome_Methylation_Main_Pathway	Reactome 1.3	0.665559	0.684533
210	KEGG_Pyrimidine_metabolism_Main_Pathway	KEGG Adjusted 1.4	0.674453	0.69277
1421	reactome_A_tetrasaccharide_linker_sequence_is_required_for_GAG_synthesis_Main_Pathway	Reactome 1.3	0.673884	0.69277
1989	reactome_Pyrimidine_catabolism_Main_Pathway	Reactome 1.3	0.674453	0.69277
12	KEGG_Amino_sugar_and_nucleotide_sugar_metabolism_Main_Pathway	KEGG Adjusted 1.4	0.679503	0.697651
1516	reactome_Bile_salt_and_organic_anion_SLC_transporters_Main_Pathway	Reactome 1.3	0.682576	0.700192
2262	reactome_Transport_of_glucose_and_other_sugars_bile_salts_and_organic_acids_metal_ions_and_amine_compounds_Main_Pathway	Reactome 1.3	0.682576	0.700192
309	NCI_Alpha4_beta1_integrin_signaling_events_Pathway_(lamellipodium_assembly)	NCI 1.2	0.685788	0.70318
126	KEGG_Influenza_A_Main_Pathway	KEGG Adjusted 1.4	0.69042	0.70762
1663	reactome_FCERI_mediated_Ca_2_mobilization_Main_Pathway	Reactome 1.3	0.691033	0.707939
2235	reactome_Toll_Like_Receptor_4_TLR4_Cascade_Main_Pathway	Reactome 1.3	0.695775	0.712485
125	KEGG_Inflammatory_mediator_regulation_of_TRP_channels_Main_Pathway	KEGG Adjusted 1.4	0.704304	0.720905
850	NCI_Regulation_of_RhoA_activity_Main_Pathway	NCI 1.2	0.70752	0.72388
445	NCI_Cellular_roles_of_Anthrax_toxin_Pathway_(monocyte_activation)	NCI 1.2	0.710177	0.726282
2196	reactome_Synthesis_of_very_long_chain_fatty_acyl_CoAs_Main_Pathway	Reactome 1.3	0.718132	0.734098
1923	reactome_P2Y_receptors_Main_Pathway	Reactome 1.3	0.721879	0.737606
1633	reactome_ECM_proteoglycans_Main_Pathway	Reactome 1.3	0.722771	0.738196
986	NCI_Thromboxane_A2_receptor_signaling_Main_Pathway	NCI 1.2	0.726039	0.741211
1068	biocarta_activation_of_pkc_through_g_protein_coupled_receptors_Main_Pathway	Biocarta 1.2	0.726709	0.741572
2237	reactome_Toll_Like_Receptor_TLR6_TLR2_Cascade_Main_Pathway	Reactome 1.3	0.728744	0.743325
1905	reactome_NrCAM_interactions_Main_Pathway	Reactome 1.3	0.730202	0.744489
983	NCI_TNF_receptor_signaling_pathway__Main_Pathway	NCI 1.2	0.7309	0.744877
124	KEGG_Inflammatory_bowel_disease_IBD__Main_Pathway	KEGG Adjusted 1.4	0.746239	0.760178
424	NCI_Calcineurin_regulated_NFAT_dependent_transcription_in_lymphocytes_Main_Pathway	NCI 1.2	0.75336	0.767099
259	KEGG_Tight_junction_Main_Pathway	KEGG Adjusted 1.4	0.775925	0.789733
25	KEGG_Axon_guidance_Main_Pathway	KEGG Adjusted 1.4	0.780404	0.793603
1763	reactome_Hexose_uptake_Main_Pathway	Reactome 1.3	0.780358	0.793603
1351	biocarta_stress_induction_of_hsp_regulation_Main_Pathway	Biocarta 1.2	0.800554	0.81374
83	KEGG_Fc_epsilon_RI_signaling_Main_Pathway	KEGG Adjusted 1.4	0.80276	0.815629
383	NCI_Beta1_integrin_cell_surface_interactions_Main_Pathway	NCI 1.2	0.803673	0.816203
224	KEGG_Retrograde_endocannabinoid_signaling_Main_Pathway	KEGG Adjusted 1.4	0.806282	0.818271
494	NCI_EPO_signaling_Pathway_(beta_integrin_mediated_adhesion)	NCI 1.2	0.807105	0.818271
1749	reactome_Growth_hormone_receptor_signaling_Main_Pathway	Reactome 1.3	0.807105	0.818271
2038	reactome_Regulation_of_IFNA_signaling_Main_Pathway	Reactome 1.3	0.807105	0.818271
1712	reactome_GP1b_IX_V_activation_signalling_Main_Pathway	Reactome 1.3	0.822616	0.833636
1561	reactome_Class_C_3_Metabotropic_glutamate_pheromone_receptors__Main_Pathway	Reactome 1.3	0.82328	0.833802
1573	reactome_Collagen_biosynthesis_and_modifying_enzymes_Main_Pathway	Reactome 1.3	0.82349	0.833802
909	NCI_Signaling_events_mediated_by_Stem_cell_factor_receptor_c_Kit__Main_Pathway	NCI 1.2	0.830247	0.84028
2225	reactome_The_NLRP3_inflammasome_Main_Pathway	Reactome 1.3	0.851718	0.861639
384	NCI_Beta2_integrin_cell_surface_interactions_Main_Pathway	NCI 1.2	0.869284	0.87903
251	KEGG_T_cell_receptor_signaling_Main_Pathway	KEGG Adjusted 1.4	0.871312	0.880701
16	KEGG_Amyotrophic_lateral_sclerosis_ALS__Main_Pathway	KEGG Adjusted 1.4	0.872426	0.881068
1007	NCI_VEGFR3_signaling_in_lymphatic_endothelium_Pathway_(cell_migration)	NCI 1.2	0.872308	0.881068
1024	NCI_Visual_signal_transduction_Cones_Main_Pathway	NCI 1.2	0.87703	0.885336
102	KEGG_Glycosaminoglycan_biosynthesis_heparan_sulfate_heparin_Main_Pathway	KEGG Adjusted 1.4	0.883712	0.891698
2040	reactome_Regulation_of_IGF_Activity_by_IGFBP_Main_Pathway	Reactome 1.3	0.887661	0.895297
1241	biocarta_nf_kb_signaling_Main_Pathway	Biocarta 1.2	0.902977	0.909961
1242	biocarta_nf_kb_signaling_Pathway_(Pathway_protein_ubiquitination_of_CHUK)	Biocarta 1.2	0.902977	0.909961
755	NCI_Notch_mediated_HES_HEY_network_Main_Pathway	NCI 1.2	0.91093	0.916401
756	NCI_Notch_mediated_HES_HEY_network_Pathway_(Pathway_degradation_of_HEY1)	NCI 1.2	0.91093	0.916401
1080	biocarta_alk_in_cardiac_myocytes_Main_Pathway	Biocarta 1.2	0.91093	0.916401
1222	biocarta_mapkinase_signaling_Main_Pathway	Biocarta 1.2	0.910844	0.916401
65	KEGG_Dopaminergic_synapse_Main_Pathway	KEGG Adjusted 1.4	0.917758	0.922874
1840	reactome_Metabolism_of_Angiotensinogen_to_Angiotensins_Main_Pathway	Reactome 1.3	0.924956	0.929714
249	KEGG_TGF_beta_signaling_Main_Pathway	KEGG Adjusted 1.4	0.935564	0.939571
686	NCI_Integrins_in_angiogenesis_Main_Pathway	NCI 1.2	0.935167	0.939571
286	KEGG_mTOR_signaling_Main_Pathway	KEGG Adjusted 1.4	0.94167	0.945298
1805	reactome_Interferon_gamma_signaling_Main_Pathway	Reactome 1.3	0.944906	0.948141
918	NCI_Signaling_events_mediated_by_TCPTP_Main_Pathway	NCI 1.2	0.952537	0.954981
921	NCI_Signaling_events_mediated_by_TCPTP_Pathway_(macrophage_differentiation)	NCI 1.2	0.952537	0.954981
582	NCI_Fc_epsilon_receptor_I_signaling_in_mast_cells_Main_Pathway	NCI 1.2	0.958171	0.960218
1910	reactome_O_glycosylation_of_TSR_domain_containing_proteins_Main_Pathway	Reactome 1.3	0.97445	0.976115
1133	biocarta_cystic_fibrosis_transmembrane_conductance_regulator_cftr_and_beta_2_adrenergic_receptor_b2ar_Main_Pathway	Biocarta 1.2	0.980946	0.982202
346	NCI_Arf6_trafficking_events_Main_Pathway	NCI 1.2	0.982568	0.983407
1810	reactome_Interleukin_7_signaling_Main_Pathway	Reactome 1.3	0.990096	0.990518
1665	reactome_FCERI_mediated_NF_kB_activation_Main_Pathway	Reactome 1.3	0.999976	0.999976
11	KEGG_Alzheimer_s_disease_Main_Pathway	KEGG Adjusted 1.4
13	KEGG_Aminoacyl_tRNA_biosynthesis_Main_Pathway	KEGG Adjusted 1.4
15	KEGG_Amphetamine_addiction_Main_Pathway	KEGG Adjusted 1.4
21	KEGG_Arrhythmogenic_right_ventricular_cardiomyopathy_ARVC__Main_Pathway	KEGG Adjusted 1.4
29	KEGG_Basal_transcription_factors_Main_Pathway	KEGG Adjusted 1.4
30	KEGG_Base_excision_repair_Main_Pathway	KEGG Adjusted 1.4
31	KEGG_Bile_secretion_Main_Pathway	KEGG Adjusted 1.4
32	KEGG_Biosynthesis_of_unsaturated_fatty_acids_Main_Pathway	KEGG Adjusted 1.4
33	KEGG_Biotin_metabolism_Main_Pathway	KEGG Adjusted 1.4
34	KEGG_Bladder_cancer_Main_Pathway	KEGG Adjusted 1.4
35	KEGG_Butanoate_metabolism_Main_Pathway	KEGG Adjusted 1.4
37	KEGG_Caffeine_metabolism_Main_Pathway	KEGG Adjusted 1.4
40	KEGG_Cardiac_muscle_contraction_Main_Pathway	KEGG Adjusted 1.4
42	KEGG_Cell_cycle_Main_Pathway	KEGG Adjusted 1.4
51	KEGG_Circadian_rhythm_Main_Pathway	KEGG Adjusted 1.4
52	KEGG_Citrate_cycle_TCA_cycle__Main_Pathway	KEGG Adjusted 1.4
60	KEGG_Cytosolic_DNA_sensing_Main_Pathway	KEGG Adjusted 1.4
61	KEGG_DNA_replication_Main_Pathway	KEGG Adjusted 1.4
62	KEGG_D_Arginine_and_D_ornithine_metabolism_Main_Pathway	KEGG Adjusted 1.4
63	KEGG_D_Glutamine_and_D_glutamate_metabolism_Main_Pathway	KEGG Adjusted 1.4
64	KEGG_Dilated_cardiomyopathy_Main_Pathway	KEGG Adjusted 1.4
66	KEGG_Dorso_ventral_axis_formation_Main_Pathway	KEGG Adjusted 1.4
71	KEGG_Endocytosis_Main_Pathway	KEGG Adjusted 1.4
73	KEGG_Epithelial_cell_signaling_in_Helicobacter_pylori_infection_Main_Pathway	KEGG Adjusted 1.4
78	KEGG_Fanconi_anemia_Main_Pathway	KEGG Adjusted 1.4
79	KEGG_Fat_digestion_and_absorption_Main_Pathway	KEGG Adjusted 1.4
80	KEGG_Fatty_acid_biosynthesis_Main_Pathway	KEGG Adjusted 1.4
81	KEGG_Fatty_acid_degradation_Main_Pathway	KEGG Adjusted 1.4
82	KEGG_Fatty_acid_elongation_Main_Pathway	KEGG Adjusted 1.4
86	KEGG_Folate_biosynthesis_Main_Pathway	KEGG Adjusted 1.4
94	KEGG_Glucagon_signaling_Main_Pathway	KEGG Adjusted 1.4
101	KEGG_Glycosaminoglycan_biosynthesis_chondroitin_sulfate_dermatan_sulfate_Main_Pathway	KEGG Adjusted 1.4
104	KEGG_Glycosaminoglycan_degradation_Main_Pathway	KEGG Adjusted 1.4
107	KEGG_Glycosphingolipid_biosynthesis_lacto_and_neolacto_series_Main_Pathway	KEGG Adjusted 1.4
108	KEGG_Glycosylphosphatidylinositol_GPI_anchor_biosynthesis_Main_Pathway	KEGG Adjusted 1.4
121	KEGG_Homologous_recombination_Main_Pathway	KEGG Adjusted 1.4
122	KEGG_Huntington_s_disease_Main_Pathway	KEGG Adjusted 1.4
123	KEGG_Hypertrophic_cardiomyopathy_HCM__Main_Pathway	KEGG Adjusted 1.4
136	KEGG_Lipoic_acid_metabolism_Main_Pathway	KEGG Adjusted 1.4
139	KEGG_Lysine_biosynthesis_Main_Pathway	KEGG Adjusted 1.4
140	KEGG_Lysine_degradation_Main_Pathway	KEGG Adjusted 1.4
143	KEGG_Malaria_Main_Pathway	KEGG Adjusted 1.4
144	KEGG_Maturity_onset_diabetes_of_the_young_Main_Pathway	KEGG Adjusted 1.4
146	KEGG_Melanogenesis_Main_Pathway	KEGG Adjusted 1.4
150	KEGG_Mineral_absorption_Main_Pathway	KEGG Adjusted 1.4
151	KEGG_Mismatch_repair_Main_Pathway	KEGG Adjusted 1.4
156	KEGG_N_Glycan_biosynthesis_Main_Pathway	KEGG Adjusted 1.4
162	KEGG_Nitrogen_metabolism_Main_Pathway	KEGG Adjusted 1.4
164	KEGG_Non_homologous_end_joining_Main_Pathway	KEGG Adjusted 1.4
166	KEGG_Notch_signaling_Main_Pathway	KEGG Adjusted 1.4
167	KEGG_Nucleotide_excision_repair_Main_Pathway	KEGG Adjusted 1.4
169	KEGG_One_carbon_pool_by_folate_Main_Pathway	KEGG Adjusted 1.4
172	KEGG_Other_glycan_degradation_Main_Pathway	KEGG Adjusted 1.4
173	KEGG_Other_types_of_O_glycan_biosynthesis_Main_Pathway	KEGG Adjusted 1.4
174	KEGG_Ovarian_steroidogenesis_Main_Pathway	KEGG Adjusted 1.4
178	KEGG_PPAR_signaling_Main_Pathway	KEGG Adjusted 1.4
182	KEGG_Parkinson_s_disease_Main_Pathway	KEGG Adjusted 1.4
183	KEGG_Pathogenic_Escherichia_coli_infection_Main_Pathway	KEGG Adjusted 1.4
186	KEGG_Pentose_phosphate_Main_Pathway	KEGG Adjusted 1.4
199	KEGG_Progesterone_mediated_oocyte_maturation_Main_Pathway	KEGG Adjusted 1.4
201	KEGG_Propanoate_metabolism_Main_Pathway	KEGG Adjusted 1.4
205	KEGG_Protein_export_Main_Pathway	KEGG Adjusted 1.4
208	KEGG_Proximal_tubule_bicarbonate_reclamation_Main_Pathway	KEGG Adjusted 1.4
212	KEGG_RIG_I_like_receptor_signaling_Main_Pathway	KEGG Adjusted 1.4
214	KEGG_RNA_polymerase_Main_Pathway	KEGG Adjusted 1.4
215	KEGG_RNA_transport_Main_Pathway	KEGG Adjusted 1.4
219	KEGG_Regulation_of_autophagy_Main_Pathway	KEGG Adjusted 1.4
226	KEGG_Riboflavin_metabolism_Main_Pathway	KEGG Adjusted 1.4
227	KEGG_Ribosome_Main_Pathway	KEGG Adjusted 1.4
228	KEGG_Ribosome_biogenesis_in_eukaryotes_Main_Pathway	KEGG Adjusted 1.4
229	KEGG_SNARE_interactions_in_vesicular_transport_Main_Pathway	KEGG Adjusted 1.4
232	KEGG_Selenocompound_metabolism_Main_Pathway	KEGG Adjusted 1.4
239	KEGG_Spliceosome_Main_Pathway	KEGG Adjusted 1.4
244	KEGG_Sulfur_metabolism_Main_Pathway	KEGG Adjusted 1.4
245	KEGG_Sulfur_relay_system_Main_Pathway	KEGG Adjusted 1.4
247	KEGG_Synthesis_and_degradation_of_ketone_bodies_Main_Pathway	KEGG Adjusted 1.4
252	KEGG_Taste_transduction_Main_Pathway	KEGG Adjusted 1.4
254	KEGG_Terpenoid_backbone_biosynthesis_Main_Pathway	KEGG Adjusted 1.4
255	KEGG_Thiamine_metabolism_Main_Pathway	KEGG Adjusted 1.4
256	KEGG_Thyroid_cancer_Main_Pathway	KEGG Adjusted 1.4
265	KEGG_Type_II_diabetes_mellitus_Main_Pathway	KEGG Adjusted 1.4
268	KEGG_Ubiquinone_and_other_terpenoid_quinone_biosynthesis_Main_Pathway	KEGG Adjusted 1.4
273	KEGG_Vascular_smooth_muscle_contraction_Main_Pathway	KEGG Adjusted 1.4
274	KEGG_Vasopressin_regulated_water_reabsorption_Main_Pathway	KEGG Adjusted 1.4
275	KEGG_Vibrio_cholerae_infection_Main_Pathway	KEGG Adjusted 1.4
277	KEGG_Viral_myocarditis_Main_Pathway	KEGG Adjusted 1.4
287	KEGG_p53_signaling_Main_Pathway	KEGG Adjusted 1.4
289	NCI_ALK1_signaling_events_Pathway_(endothelial_cell_migration)	NCI 1.2
290	NCI_ALK1_signaling_events_Pathway_(endothelial_cell_proliferation)	NCI 1.2
291	NCI_ALK1_signaling_events_Pathway_(sprouting_angiogenesis)	NCI 1.2
292	NCI_ALK2_signaling_events_Main_Pathway	NCI 1.2
293	NCI_AP_1_transcription_factor_network_Main_Pathway	NCI 1.2
295	NCI_ATM_Main_Pathway	NCI 1.2
296	NCI_ATM_Pathway_(G1_S_transition_checkpoint)	NCI 1.2
297	NCI_ATM_Pathway_(G2_M_transition_checkpoint)	NCI 1.2
298	NCI_ATM_Pathway_(Pathway_rRNA_transcription_via_ATM)	NCI 1.2
299	NCI_ATM_Pathway_(apoptosis)	NCI 1.2
300	NCI_ATM_Pathway_(chromatin_remodeling)	NCI 1.2
301	NCI_ATM_Pathway_(double_strand_break_repair_via_nonhomologous_end_joining)	NCI 1.2
310	NCI_Alpha6_beta4_integrin_ligand_interactions_Main_Pathway	NCI 1.2
315	NCI_Alpha_synuclein_signaling_Pathway_(Pathway_degradation_of_SNCA)	NCI 1.2
316	NCI_Alpha_synuclein_signaling_Pathway_(Pathway_negative_regulation_of_transcription_via_SNCA)	NCI 1.2
318	NCI_Alpha_synuclein_signaling_Pathway_(Pathway_positive_regulation_of_gene_specific_transcription_via_SNCA)	NCI 1.2
324	NCI_Alternative_NF_kappaB_Main_Pathway	NCI 1.2
325	NCI_Alternative_NF_kappaB_Pathway_(regulation_of_B_cell_activation)	NCI 1.2
327	NCI_Angiopoietin_receptor_Tie2_mediated_signaling_Pathway_(MAPKKK_cascade)	NCI 1.2
328	NCI_Angiopoietin_receptor_Tie2_mediated_signaling_Pathway_(chemokinesis)	NCI 1.2
329	NCI_Angiopoietin_receptor_Tie2_mediated_signaling_Pathway_(negative_regulation_of_caspase_activity)	NCI 1.2
330	NCI_Angiopoietin_receptor_Tie2_mediated_signaling_Pathway_(tube_development)	NCI 1.2
331	NCI_Angiopoietin_receptor_Tie2_mediated_signaling_Pathway_(vasculogenesis)	NCI 1.2
333	NCI_Arf1_Pathway_(actin_filament_polymerization)	NCI 1.2
335	NCI_Arf6_downstream_Pathway_(Tumor_Cell_Invasion)	NCI 1.2
336	NCI_Arf6_downstream_Pathway_(actin_filament_bundle_formation)	NCI 1.2
339	NCI_Arf6_downstream_Pathway_(liver_development)	NCI 1.2
340	NCI_Arf6_downstream_Pathway_(myoblast_fusion)	NCI 1.2
341	NCI_Arf6_downstream_Pathway_(regulation_of_axonogenesis)	NCI 1.2
342	NCI_Arf6_downstream_Pathway_(regulation_of_epithelial_cell_migration)	NCI 1.2
343	NCI_Arf6_downstream_Pathway_(ruffle_organization)	NCI 1.2
344	NCI_Arf6_downstream_Pathway_(substrate_adhesion_dependent_cell_spreading)	NCI 1.2
347	NCI_Arf6_trafficking_events_Pathway_(calcium_ion_dependent_exocytosis)	NCI 1.2
349	NCI_Arf6_trafficking_events_Pathway_(clathrin_coat_assembly)	NCI 1.2
350	NCI_Arf6_trafficking_events_Pathway_(clathrin_independent_pinocytosis)	NCI 1.2
351	NCI_Arf6_trafficking_events_Pathway_(endocytosis)	NCI 1.2
352	NCI_Arf6_trafficking_events_Pathway_(membrane_fusion)	NCI 1.2
353	NCI_Arf6_trafficking_events_Pathway_(positive_regulation_of_endocytosis)	NCI 1.2
354	NCI_Arf6_trafficking_events_Pathway_(positive_regulation_of_phagocytosis)	NCI 1.2
355	NCI_Arf6_trafficking_events_Pathway_(receptor_recycling)	NCI 1.2
356	NCI_Arf6_trafficking_events_Pathway_(regulation_of_calcium_dependent_cell_cell_adhesion)	NCI 1.2
357	NCI_Arf6_trafficking_events_Pathway_(substrate_adhesion_dependent_cell_spreading)	NCI 1.2
360	NCI_Atypical_NF_kappaB_Pathway_(Pathway_degradation_of_NFKBIA)	NCI 1.2
362	NCI_Aurora_A_signaling_Main_Pathway	NCI 1.2
363	NCI_Aurora_A_signaling_Pathway_(centrosome_duplication)	NCI 1.2
364	NCI_Aurora_A_signaling_Pathway_(negative_regulation_of_DNA_binding)	NCI 1.2
365	NCI_Aurora_A_signaling_Pathway_(proteasomal_ubiquitin_dependent_protein_catabolic_process)	NCI 1.2
366	NCI_Aurora_A_signaling_Pathway_(protein_catabolic_process)	NCI 1.2
367	NCI_Aurora_A_signaling_Pathway_(regulation_of_centrosome_cycle)	NCI 1.2
368	NCI_Aurora_A_signaling_Pathway_(spindle_assembly)	NCI 1.2
370	NCI_Aurora_B_signaling_Pathway_(cytokinesis)	NCI 1.2
371	NCI_Aurora_C_signaling_Main_Pathway	NCI 1.2
372	NCI_BARD1_signaling_events_Main_Pathway	NCI 1.2
373	NCI_BARD1_signaling_events_Pathway_(DNA_damage_checkpoint)	NCI 1.2
374	NCI_BARD1_signaling_events_Pathway_(DNA_repair)	NCI 1.2
375	NCI_BARD1_signaling_events_Pathway_(protein_ubiquitination)	NCI 1.2
377	NCI_BCR_signaling_Pathway_(actin_cytoskeleton_organization)	NCI 1.2
381	NCI_BCR_signaling_Pathway_(ubiquitin_dependent_protein_catabolic_process)	NCI 1.2
396	NCI_CDC42_signaling_events_Pathway_(Pathway_positive_regulation_of_NF_kappaB_transcription_factor_activity_via_CDC42)	NCI 1.2
397	NCI_CDC42_signaling_events_Pathway_(RNA_splicing)	NCI 1.2
398	NCI_CDC42_signaling_events_Pathway_(actin_cytoskeleton_organization)	NCI 1.2
399	NCI_CDC42_signaling_events_Pathway_(actin_filament_depolymerization)	NCI 1.2
400	NCI_CDC42_signaling_events_Pathway_(cell_motility)	NCI 1.2
401	NCI_CDC42_signaling_events_Pathway_(cell_proliferation)	NCI 1.2
402	NCI_CDC42_signaling_events_Pathway_(cytokinesis)	NCI 1.2
403	NCI_CDC42_signaling_events_Pathway_(establishment_of_cell_polarity)	NCI 1.2
404	NCI_CDC42_signaling_events_Pathway_(neuron_projection_development)	NCI 1.2
405	NCI_CDC42_signaling_events_Pathway_(regulation_of_filopodium_assembly)	NCI 1.2
406	NCI_CDC42_signaling_events_Pathway_(retrograde_vesicle_mediated_transport_Golgi_to_ER)	NCI 1.2
415	NCI_CXCR4_mediated_signaling_events_Pathway_(actin_filament_depolymerization)	NCI 1.2
420	NCI_CXCR4_mediated_signaling_events_Pathway_(positive_regulation_of_lamellipodium_assembly)	NCI 1.2
423	NCI_C_MYC_Main_Pathway	NCI 1.2
428	NCI_Canonical_NF_kappaB_Pathway_(proteasomal_ubiquitin_dependent_protein_catabolic_process)	NCI 1.2
429	NCI_Canonical_Wnt_signaling_Main_Pathway	NCI 1.2
431	NCI_Caspase_Cascade_in_Apoptosis_Pathway_(DNA_fragmentation_during_apoptosis)	NCI 1.2
432	NCI_Caspase_Cascade_in_Apoptosis_Pathway_(DNA_repair)	NCI 1.2
433	NCI_Caspase_Cascade_in_Apoptosis_Pathway_(JNK_cascade)	NCI 1.2
434	NCI_Caspase_Cascade_in_Apoptosis_Pathway_(actin_filament_polymerization)	NCI 1.2
436	NCI_Caspase_Cascade_in_Apoptosis_Pathway_(apoptotic_nuclear_changes)	NCI 1.2
438	NCI_Caspase_Cascade_in_Apoptosis_Pathway_(nuclear_fragmentation_during_apoptosis)	NCI 1.2
439	NCI_Caspase_Cascade_in_Apoptosis_Pathway_(positive_regulation_of_apoptosis)	NCI 1.2
456	NCI_Ceramide_signaling_Pathway_(regulation_of_nitric_oxide_biosynthetic_process)	NCI 1.2
457	NCI_Circadian_rhythm_Main_Pathway	NCI 1.2
458	NCI_Circadian_rhythm_Pathway_(S_phase_of_mitotic_cell_cycle)	NCI 1.2
459	NCI_Circadian_rhythm_Pathway_(chromatin_modification)	NCI 1.2
465	NCI_Class_I_PI3K_signaling_events_mediated_by_Akt_Main_Pathway	NCI 1.2
466	NCI_Class_I_PI3K_signaling_events_mediated_by_Akt_Pathway_(G1_S_transition_of_mitotic_cell_cycle)	NCI 1.2
467	NCI_Class_I_PI3K_signaling_events_mediated_by_Akt_Pathway_(cell_survival)	NCI 1.2
468	NCI_Class_I_PI3K_signaling_events_mediated_by_Akt_Pathway_(glucose_import)	NCI 1.2
469	NCI_Class_I_PI3K_signaling_events_mediated_by_Akt_Pathway_(negative_regulation_of_cell_cycle)	NCI 1.2
470	NCI_Coregulation_of_Androgen_receptor_activity_Main_Pathway	NCI 1.2
471	NCI_Coregulation_of_Androgen_receptor_activity_Pathway_(cell_proliferation)	NCI 1.2
472	NCI_DNA_PK_pathway_in_nonhomologous_end_joining_Main_Pathway	NCI 1.2
473	NCI_DNA_PK_pathway_in_nonhomologous_end_joining_Pathway_(V_D_J_recombination)	NCI 1.2
474	NCI_DNA_PK_pathway_in_nonhomologous_end_joining_Pathway_(double_strand_break_repair_via_homologous_recombination)	NCI 1.2
475	NCI_DNA_PK_pathway_in_nonhomologous_end_joining_Pathway_(double_strand_break_repair_via_nonhomologous_end_joining)	NCI 1.2
476	NCI_DNA_PK_pathway_in_nonhomologous_end_joining_Pathway_(immunoglobulin_heavy_chain_V_D_J_recombination)	NCI 1.2
477	NCI_DNA_PK_pathway_in_nonhomologous_end_joining_Pathway_(immunoglobulin_light_chain_V_J_recombination)	NCI 1.2
478	NCI_Degradation_of_beta_catenin_Main_Pathway	NCI 1.2
482	NCI_Downstream_signaling_in_naive_CD8_T_cells_Pathway_(alpha_beta_T_cell_proliferation)	NCI 1.2
483	NCI_E2F_transcription_factor_network_Main_Pathway	NCI 1.2
484	NCI_EGFR_dependent_Endothelin_signaling_events_Main_Pathway	NCI 1.2
487	NCI_EPHA_forward_signaling_Pathway_(actin_filament_depolymerization)	NCI 1.2
488	NCI_EPHA_forward_signaling_Pathway_(axon_guidance)	NCI 1.2
489	NCI_EPHA_forward_signaling_Pathway_(cell_cell_adhesion)	NCI 1.2
491	NCI_EPHA_forward_signaling_Pathway_(regulation_of_stress_fiber_assembly)	NCI 1.2
492	NCI_EPHB_forward_signaling_Main_Pathway	NCI 1.2
495	NCI_EPO_signaling_Pathway_(cell_proliferation)	NCI 1.2
496	NCI_EPO_signaling_Pathway_(elevation_of_cytosolic_calcium_ion_concentration)	NCI 1.2
497	NCI_E_cadherin_signaling_in_keratinocytes_Main_Pathway	NCI 1.2
498	NCI_E_cadherin_signaling_in_keratinocytes_Pathway_(actin_cable_formation)	NCI 1.2
499	NCI_E_cadherin_signaling_in_keratinocytes_Pathway_(adherens_junction_organization)	NCI 1.2
500	NCI_E_cadherin_signaling_in_keratinocytes_Pathway_(apoptosis)	NCI 1.2
501	NCI_E_cadherin_signaling_in_keratinocytes_Pathway_(establishment_of_polarity_of_embryonic_epithelium)	NCI 1.2
502	NCI_E_cadherin_signaling_in_keratinocytes_Pathway_(keratinocyte_differentiation)	NCI 1.2
505	NCI_E_cadherin_signaling_in_the_nascent_adherens_junction_Pathway_(adherens_junction_assembly)	NCI 1.2
506	NCI_E_cadherin_signaling_in_the_nascent_adherens_junction_Pathway_(regulation_of_actin_nucleation)	NCI 1.2
507	NCI_E_cadherin_signaling_in_the_nascent_adherens_junction_Pathway_(regulation_of_calcium_dependent_cell_cell_adhesion)	NCI 1.2
508	NCI_E_cadherin_signaling_in_the_nascent_adherens_junction_Pathway_(regulation_of_cell_cell_adhesion)	NCI 1.2
524	NCI_Endothelins_Pathway_(arachidonic_acid_secretion)	NCI 1.2
525	NCI_Endothelins_Pathway_(cAMP_biosynthetic_process)	NCI 1.2
526	NCI_Endothelins_Pathway_(positive_regulation_of_muscle_contraction)	NCI 1.2
527	NCI_Endothelins_Pathway_(regulation_of_vascular_smooth_muscle_contraction)	NCI 1.2
528	NCI_Ephrin_A_reverse_signaling_Main_Pathway	NCI 1.2
529	NCI_Ephrin_A_reverse_signaling_Pathway_(MAPKKK_cascade)	NCI 1.2
530	NCI_Ephrin_A_reverse_signaling_Pathway_(beta_integrin_mediated_adhesion)	NCI 1.2
531	NCI_Ephrin_A_reverse_signaling_Pathway_(neuron_projection_morphogenesis)	NCI 1.2
536	NCI_Ephrin_B_reverse_signaling_Pathway_(endothelial_cell_proliferation)	NCI 1.2
537	NCI_ErbB1_downstream_signaling_Main_Pathway	NCI 1.2
538	NCI_ErbB1_downstream_signaling_Pathway_(cell_migration)	NCI 1.2
539	NCI_ErbB1_downstream_signaling_Pathway_(cell_proliferation)	NCI 1.2
540	NCI_ErbB1_downstream_signaling_Pathway_(cytoskeleton_organization)	NCI 1.2
541	NCI_ErbB1_downstream_signaling_Pathway_(lamellipodium_assembly)	NCI 1.2
542	NCI_ErbB1_downstream_signaling_Pathway_(ruffle_organization)	NCI 1.2
543	NCI_ErbB1_downstream_signaling_Pathway_(tight_junction_assembly)	NCI 1.2
544	NCI_ErbB2_ErbB3_signaling_events_Main_Pathway	NCI 1.2
545	NCI_ErbB2_ErbB3_signaling_events_Pathway_(activation_of_caspase_activity)	NCI 1.2
546	NCI_ErbB2_ErbB3_signaling_events_Pathway_(apoptosis)	NCI 1.2
547	NCI_ErbB2_ErbB3_signaling_events_Pathway_(cell_migration)	NCI 1.2
548	NCI_ErbB2_ErbB3_signaling_events_Pathway_(cell_proliferation)	NCI 1.2
549	NCI_ErbB2_ErbB3_signaling_events_Pathway_(heart_morphogenesis)	NCI 1.2
550	NCI_ErbB2_ErbB3_signaling_events_Pathway_(mammary_gland_morphogenesis)	NCI 1.2
551	NCI_ErbB2_ErbB3_signaling_events_Pathway_(myelination)	NCI 1.2
552	NCI_ErbB2_ErbB3_signaling_events_Pathway_(nervous_system_development)	NCI 1.2
553	NCI_ErbB4_signaling_events_Main_Pathway	NCI 1.2
554	NCI_ErbB4_signaling_events_Pathway_(apoptosis)	NCI 1.2
555	NCI_ErbB4_signaling_events_Pathway_(axon_guidance)	NCI 1.2
556	NCI_ErbB4_signaling_events_Pathway_(cell_proliferation)	NCI 1.2
557	NCI_ErbB4_signaling_events_Pathway_(chemotaxis)	NCI 1.2
558	NCI_ErbB4_signaling_events_Pathway_(dendrite_morphogenesis)	NCI 1.2
559	NCI_ErbB4_signaling_events_Pathway_(epithelial_cell_differentiation)	NCI 1.2
560	NCI_ErbB4_signaling_events_Pathway_(glial_cell_differentiation)	NCI 1.2
561	NCI_ErbB4_signaling_events_Pathway_(heart_development)	NCI 1.2
562	NCI_ErbB4_signaling_events_Pathway_(neural_crest_cell_migration)	NCI 1.2
563	NCI_ErbB_receptor_signaling_network_Main_Pathway	NCI 1.2
565	NCI_FAS_CD95_signaling_Pathway_(cell_cycle)	NCI 1.2
570	NCI_FGF_signaling_Main_Pathway	NCI 1.2
571	NCI_FGF_signaling_Pathway_(MAPKKK_cascade)	NCI 1.2
572	NCI_FGF_signaling_Pathway_(cell_migration)	NCI 1.2
573	NCI_FGF_signaling_Pathway_(negative_regulation_of_apoptosis)	NCI 1.2
575	NCI_FOXA2_and_FOXA3_transcription_factor_networks_Main_Pathway	NCI 1.2
576	NCI_FOXM1_transcription_factor_network_Main_Pathway	NCI 1.2
577	NCI_Fanconi_anemia_Main_Pathway	NCI 1.2
578	NCI_Fanconi_anemia_Pathway_(DNA_repair)	NCI 1.2
579	NCI_Fanconi_anemia_Pathway_(G1_S_transition_checkpoint)	NCI 1.2
580	NCI_Fanconi_anemia_Pathway_(Sister_Chromatid_Exchange_Process)	NCI 1.2
581	NCI_Fanconi_anemia_Pathway_(regulation_of_double_strand_break_repair_via_homologous_recombination)	NCI 1.2
583	NCI_Fc_epsilon_receptor_I_signaling_in_mast_cells_Pathway_(regulation_of_mast_cell_degranulation)	NCI 1.2
584	NCI_FoxO_family_signaling_Main_Pathway	NCI 1.2
585	NCI_GMCSF_mediated_signaling_events_Main_Pathway	NCI 1.2
586	NCI_Glucocorticoid_receptor_regulatory_network_Main_Pathway	NCI 1.2
587	NCI_Glucocorticoid_receptor_regulatory_network_Pathway_(MAPKKK_cascade)	NCI 1.2
588	NCI_Glucocorticoid_receptor_regulatory_network_Pathway_(apoptosis)	NCI 1.2
589	NCI_Glucocorticoid_receptor_regulatory_network_Pathway_(histone_acetylation)	NCI 1.2
594	NCI_Glypican_2_network_Main_Pathway	NCI 1.2
595	NCI_Glypican_3_network_Main_Pathway	NCI 1.2
596	NCI_Glypican_3_network_Pathway_(apoptosis)	NCI 1.2
597	NCI_Glypican_3_network_Pathway_(embryonic_digit_morphogenesis)	NCI 1.2
598	NCI_Glypican_3_network_Pathway_(kidney_development)	NCI 1.2
599	NCI_Glypican_3_network_Pathway_(skeletal_system_development)	NCI 1.2
600	NCI_HIF_1_alpha_transcription_factor_network_Main_Pathway	NCI 1.2
601	NCI_HIF_2_alpha_transcription_factor_network_Main_Pathway	NCI 1.2
602	NCI_HIF_2_alpha_transcription_factor_network_Pathway_(neuron_apoptosis)	NCI 1.2
609	NCI_Hypoxic_and_oxygen_homeostasis_regulation_of_HIF_1_alpha_Main_Pathway	NCI 1.2
618	NCI_IGF1_Main_Pathway	NCI 1.2
619	NCI_IGF1_Pathway_(positive_regulation_of_MAPKKK_cascade)	NCI 1.2
643	NCI_IL2_mediated_signaling_events_Pathway_(G1_S_transition_of_mitotic_cell_cycle)	NCI 1.2
652	NCI_IL2_signaling_events_mediated_by_STAT5_Main_Pathway	NCI 1.2
653	NCI_IL2_signaling_events_mediated_by_STAT5_Pathway_(CD4_positive_CD25_positive_alpha_beta_regulatory_T_cell_lineage_commitment)	NCI 1.2
654	NCI_IL2_signaling_events_mediated_by_STAT5_Pathway_(activation_induced_cell_death_of_T_cells)	NCI 1.2
657	NCI_IL4_mediated_signaling_events_Pathway_(T_cell_proliferation)	NCI 1.2
658	NCI_IL4_mediated_signaling_events_Pathway_(T_helper_1_cell_differentiation)	NCI 1.2
659	NCI_IL4_mediated_signaling_events_Pathway_(T_helper_2_cell_differentiation)	NCI 1.2
664	NCI_IL6_mediated_signaling_events_Pathway_(MAPKKK_cascade)	NCI 1.2
665	NCI_IL6_mediated_signaling_events_Pathway_(cell_cycle_arrest)	NCI 1.2
666	NCI_IL6_mediated_signaling_events_Pathway_(cell_survival)	NCI 1.2
667	NCI_IL6_mediated_signaling_events_Pathway_(macrophage_differentiation)	NCI 1.2
669	NCI_IL8_and_CXCR1_mediated_signaling_events_Pathway_(basophil_degranulation)	NCI 1.2
676	NCI_Insulin_Pathway_Main_Pathway	NCI 1.2
677	NCI_Insulin_Pathway_Pathway_(negative_regulation_of_MAPKKK_cascade)	NCI 1.2
678	NCI_Insulin_mediated_glucose_transport_Main_Pathway	NCI 1.2
681	NCI_Integrin_linked_kinase_signaling_Pathway_(anoikis)	NCI 1.2
682	NCI_Integrin_linked_kinase_signaling_Pathway_(apoptosis)	NCI 1.2
684	NCI_Integrin_linked_kinase_signaling_Pathway_(microtubule_cytoskeleton_organization)	NCI 1.2
691	NCI_LKB1_signaling_events_Pathway_(ATP_biosynthetic_process)	NCI 1.2
692	NCI_LKB1_signaling_events_Pathway_(ATP_metabolic_process)	NCI 1.2
693	NCI_LKB1_signaling_events_Pathway_(Pathway_degradation_of_CDC37)	NCI 1.2
694	NCI_LKB1_signaling_events_Pathway_(Pathway_positive_regulation_of_CREB_transcription_factor_activity_via_CRTC2)	NCI 1.2
695	NCI_LKB1_signaling_events_Pathway_(Wnt_receptor_signaling_pathway)	NCI 1.2
696	NCI_LKB1_signaling_events_Pathway_(anoikis)	NCI 1.2
697	NCI_LKB1_signaling_events_Pathway_(chromatin_remodeling)	NCI 1.2
698	NCI_LKB1_signaling_events_Pathway_(establishment_of_cell_polarity)	NCI 1.2
699	NCI_LKB1_signaling_events_Pathway_(tubulin_complex_assembly)	NCI 1.2
700	NCI_LPA4_mediated_signaling_events_Main_Pathway	NCI 1.2
701	NCI_LPA4_mediated_signaling_events_Pathway_(cAMP_biosynthetic_process)	NCI 1.2
703	NCI_LPA_receptor_mediated_events_Pathway_(MAPKKK_cascade)	NCI 1.2
704	NCI_LPA_receptor_mediated_events_Pathway_(arachidonic_acid_secretion)	NCI 1.2
705	NCI_LPA_receptor_mediated_events_Pathway_(cAMP_biosynthetic_process)	NCI 1.2
707	NCI_LPA_receptor_mediated_events_Pathway_(positive_regulation_of_dendritic_cell_cytokine_production)	NCI 1.2
708	NCI_LPA_receptor_mediated_events_Pathway_(positive_regulation_of_microtubule_depolymerization)	NCI 1.2
709	NCI_LPA_receptor_mediated_events_Pathway_(positive_regulation_of_mitosis)	NCI 1.2
710	NCI_LPA_receptor_mediated_events_Pathway_(stress_fiber_assembly)	NCI 1.2
712	NCI_Lissencephaly_gene_LIS1_in_neuronal_migration_and_development_Pathway_(anaphase)	NCI 1.2
713	NCI_Lissencephaly_gene_LIS1_in_neuronal_migration_and_development_Pathway_(microtubule_based_movement)	NCI 1.2
715	NCI_N_cadherin_signaling_events_Pathway_(actin_filament_polymerization)	NCI 1.2
716	NCI_N_cadherin_signaling_events_Pathway_(adherens_junction_organization)	NCI 1.2
717	NCI_N_cadherin_signaling_events_Pathway_(apoptosis)	NCI 1.2
718	NCI_N_cadherin_signaling_events_Pathway_(axon_guidance)	NCI 1.2
720	NCI_N_cadherin_signaling_events_Pathway_(cardiac_muscle_tissue_morphogenesis)	NCI 1.2
721	NCI_N_cadherin_signaling_events_Pathway_(cortical_microtubule_organization)	NCI 1.2
722	NCI_N_cadherin_signaling_events_Pathway_(endothelial_cell_proliferation)	NCI 1.2
723	NCI_N_cadherin_signaling_events_Pathway_(gap_junction_assembly)	NCI 1.2
724	NCI_N_cadherin_signaling_events_Pathway_(lamellipodium_assembly)	NCI 1.2
725	NCI_N_cadherin_signaling_events_Pathway_(long_term_synaptic_potentiation)	NCI 1.2
726	NCI_N_cadherin_signaling_events_Pathway_(myoblast_differentiation)	NCI 1.2
727	NCI_N_cadherin_signaling_events_Pathway_(osteoblast_differentiation)	NCI 1.2
728	NCI_N_cadherin_signaling_events_Pathway_(protein_transport_into_membrane_raft)	NCI 1.2
729	NCI_N_cadherin_signaling_events_Pathway_(regulation_of_cell_cell_adhesion)	NCI 1.2
730	NCI_N_cadherin_signaling_events_Pathway_(regulation_of_short_term_neuronal_synaptic_plasticity)	NCI 1.2
731	NCI_N_cadherin_signaling_events_Pathway_(regulation_of_synapse_organization)	NCI 1.2
732	NCI_N_cadherin_signaling_events_Pathway_(regulation_of_synaptic_plasticity)	NCI 1.2
733	NCI_N_cadherin_signaling_events_Pathway_(synaptic_vesicle_fusion_to_presynaptic_membrane)	NCI 1.2
734	NCI_Nectin_adhesion_Main_Pathway	NCI 1.2
735	NCI_Nectin_adhesion_Pathway_(positive_regulation_of_JNK_cascade)	NCI 1.2
736	NCI_Nectin_adhesion_Pathway_(positive_regulation_of_lamellipodium_assembly)	NCI 1.2
737	NCI_Nephrin_Neph1_signaling_in_the_kidney_podocyte_Main_Pathway	NCI 1.2
738	NCI_Nephrin_Neph1_signaling_in_the_kidney_podocyte_Pathway_(apoptosis)	NCI 1.2
739	NCI_Nephrin_Neph1_signaling_in_the_kidney_podocyte_Pathway_(lamellipodium_assembly)	NCI 1.2
740	NCI_Netrin_mediated_signaling_events_Main_Pathway	NCI 1.2
741	NCI_Netrin_mediated_signaling_events_Pathway_(apoptosis)	NCI 1.2
742	NCI_Netrin_mediated_signaling_events_Pathway_(axon_guidance)	NCI 1.2
743	NCI_Netrin_mediated_signaling_events_Pathway_(negative_chemotaxis)	NCI 1.2
745	NCI_Neurotrophic_factor_mediated_Trk_receptor_signaling_Pathway_(MAPKKK_cascade)	NCI 1.2
747	NCI_Neurotrophic_factor_mediated_Trk_receptor_signaling_Pathway_(axon_guidance)	NCI 1.2
749	NCI_Noncanonical_Wnt_signaling_Main_Pathway	NCI 1.2
750	NCI_Nongenotropic_Androgen_signaling_Main_Pathway	NCI 1.2
751	NCI_Nongenotropic_Androgen_signaling_Pathway_(actin_cytoskeleton_reorganization)	NCI 1.2
752	NCI_Nongenotropic_Androgen_signaling_Pathway_(apoptosis)	NCI 1.2
753	NCI_Nongenotropic_Androgen_signaling_Pathway_(cAMP_biosynthetic_process)	NCI 1.2
754	NCI_Nongenotropic_Androgen_signaling_Pathway_(cell_proliferation)	NCI 1.2
760	NCI_Notch_signaling_Pathway_(skeletal_muscle_tissue_development)	NCI 1.2
763	NCI_Osteopontin_mediated_events_Pathway_(ruffle_organization)	NCI 1.2
766	NCI_PAR1_mediated_thrombin_signaling_events_Pathway_(Regulation_of_Cell_Shape)	NCI 1.2
768	NCI_PAR1_mediated_thrombin_signaling_events_Pathway_(chemotaxis)	NCI 1.2
769	NCI_PAR1_mediated_thrombin_signaling_events_Pathway_(focal_adhesion_assembly)	NCI 1.2
774	NCI_PAR4_mediated_thrombin_signaling_events_Pathway_(Regulation_of_Cell_Shape)	NCI 1.2
775	NCI_PAR4_mediated_thrombin_signaling_events_Pathway_(platelet_aggregation)	NCI 1.2
776	NCI_PDGFR_alpha_signaling_Main_Pathway	NCI 1.2
777	NCI_PDGFR_alpha_signaling_Pathway_(JAK_STAT_cascade)	NCI 1.2
778	NCI_PDGFR_alpha_signaling_Pathway_(Ras_protein_signal_transduction)	NCI 1.2
779	NCI_PDGFR_alpha_signaling_Pathway_(positive_regulation_of_JUN_kinase_activity)	NCI 1.2
781	NCI_PDGFR_beta_signaling_Pathway_(actin_cytoskeleton_organization)	NCI 1.2
784	NCI_PDGFR_beta_signaling_Pathway_(focal_adhesion_assembly)	NCI 1.2
787	NCI_PDGF_receptor_signaling_network_Main_Pathway	NCI 1.2
788	NCI_PDGF_receptor_signaling_network_Pathway_(platelet_derived_growth_factor_receptor_signaling_pathway)	NCI 1.2
789	NCI_PLK1_signaling_events_Main_Pathway	NCI 1.2
790	NCI_PLK1_signaling_events_Pathway_(G2_M_transition_of_mitotic_cell_cycle)	NCI 1.2
791	NCI_PLK1_signaling_events_Pathway_(Golgi_organization)	NCI 1.2
792	NCI_PLK1_signaling_events_Pathway_(chromosome_segregation)	NCI 1.2
793	NCI_PLK1_signaling_events_Pathway_(cytokinesis)	NCI 1.2
794	NCI_PLK1_signaling_events_Pathway_(metaphase_plate_congression)	NCI 1.2
795	NCI_PLK1_signaling_events_Pathway_(microtubule_cytoskeleton_organization)	NCI 1.2
796	NCI_PLK1_signaling_events_Pathway_(positive_regulation_of_microtubule_depolymerization)	NCI 1.2
797	NCI_PLK1_signaling_events_Pathway_(proteasomal_ubiquitin_dependent_protein_catabolic_process)	NCI 1.2
798	NCI_PLK1_signaling_events_Pathway_(regulation_of_attachment_of_spindle_microtubules_to_kinetochore)	NCI 1.2
799	NCI_PLK1_signaling_events_Pathway_(regulation_of_centriole_centriole_cohesion)	NCI 1.2
800	NCI_PLK1_signaling_events_Pathway_(regulation_of_mitotic_centrosome_separation)	NCI 1.2
801	NCI_PLK1_signaling_events_Pathway_(spindle_assembly)	NCI 1.2
802	NCI_PLK1_signaling_events_Pathway_(spindle_elongation)	NCI 1.2
803	NCI_PLK1_signaling_events_Pathway_(spindle_stabilization)	NCI 1.2
804	NCI_PLK2_and_PLK4_events_Main_Pathway	NCI 1.2
805	NCI_PLK2_and_PLK4_events_Pathway_(regulation_of_centriole_replication)	NCI 1.2
806	NCI_PLK3_signaling_events_Main_Pathway	NCI 1.2
808	NCI_Plasma_membrane_estrogen_receptor_signaling_Pathway_(JNK_cascade)	NCI 1.2
813	NCI_Plasma_membrane_estrogen_receptor_signaling_Pathway_(pseudopodium_formation)	NCI 1.2
814	NCI_Plasma_membrane_estrogen_receptor_signaling_Pathway_(regulation_of_stress_fiber_assembly)	NCI 1.2
815	NCI_Plasma_membrane_estrogen_receptor_signaling_Pathway_(ruffle_organization)	NCI 1.2
819	NCI_Plexin_D1_Signaling_Pathway_(endothelial_cell_migration)	NCI 1.2
824	NCI_Posttranslational_regulation_of_adherens_junction_stability_and_dissassembly_Pathway_(axonogenesis)	NCI 1.2
828	NCI_Proteoglycan_syndecan_mediated_signaling_events_Main_Pathway	NCI 1.2
830	NCI_RAC1_signaling_Pathway_(Pathway_positive_regulation_of_NF_kappaB_transcription_factor_activity_via_RAC1)	NCI 1.2
831	NCI_RAC1_signaling_Pathway_(actin_filament_depolymerization)	NCI 1.2
832	NCI_RAC1_signaling_Pathway_(actin_filament_polymerization)	NCI 1.2
833	NCI_RAC1_signaling_Pathway_(lamellipodium_assembly)	NCI 1.2
834	NCI_RAC1_signaling_Pathway_(neuron_projection_development)	NCI 1.2
835	NCI_RAC1_signaling_Pathway_(positive_regulation_of_Wnt_receptor_signaling_pathway)	NCI 1.2
836	NCI_RAC1_signaling_Pathway_(regulation_of_cell_cycle)	NCI 1.2
837	NCI_RXR_and_RAR_heterodimerization_with_other_nuclear_receptor_Main_Pathway	NCI 1.2
838	NCI_Rapid_glucocorticoid_signaling_Main_Pathway	NCI 1.2
839	NCI_Rapid_glucocorticoid_signaling_Pathway_(glutamate_secretion)	NCI 1.2
844	NCI_Regulation_of_Androgen_receptor_activity_Main_Pathway	NCI 1.2
845	NCI_Regulation_of_Androgen_receptor_activity_Pathway_(Pathway_positive_regulation_of_transcription_via_GATA2)	NCI 1.2
846	NCI_Regulation_of_Androgen_receptor_activity_Pathway_(cell_proliferation)	NCI 1.2
852	NCI_Regulation_of_Telomerase_Pathway_(cell_cycle)	NCI 1.2
853	NCI_Regulation_of_cytoplasmic_and_nuclear_SMAD2_3_signaling_Main_Pathway	NCI 1.2
855	NCI_Regulation_of_nuclear_SMAD2_3_signaling_Pathway_(Pathway_degradation_of_SMAD3)	NCI 1.2
856	NCI_Regulation_of_nuclear_SMAD2_3_signaling_Pathway_(muscle_cell_differentiation)	NCI 1.2
857	NCI_Regulation_of_nuclear_SMAD2_3_signaling_Pathway_(negative_regulation_of_cell_growth)	NCI 1.2
858	NCI_Regulation_of_nuclear_beta_catenin_signaling_and_target_gene_transcription_Main_Pathway	NCI 1.2
862	NCI_Regulation_of_retinoblastoma_protein_Pathway_(Pathway_rRNA_transcription_via_RB1)	NCI 1.2
864	NCI_Regulation_of_retinoblastoma_protein_Pathway_(histone_methylation)	NCI 1.2
865	NCI_Regulation_of_retinoblastoma_protein_Pathway_(proteasomal_ubiquitin_dependent_protein_catabolic_process)	NCI 1.2
866	NCI_Retinoic_acid_receptors_mediated_signaling_Main_Pathway	NCI 1.2
867	NCI_Retinoic_acid_receptors_mediated_signaling_Pathway_(proteasomal_ubiquitin_dependent_protein_catabolic_process)	NCI 1.2
868	NCI_RhoA_signaling_Main_Pathway	NCI 1.2
869	NCI_RhoA_signaling_Pathway_(Golgi_organization)	NCI 1.2
870	NCI_RhoA_signaling_Pathway_(Pathway_positive_regulation_of_NF_kappaB_transcription_factor_activity_via_RHOA)	NCI 1.2
871	NCI_RhoA_signaling_Pathway_(actin_cytoskeleton_organization)	NCI 1.2
872	NCI_RhoA_signaling_Pathway_(actin_filament_depolymerization)	NCI 1.2
874	NCI_Role_of_Calcineurin_dependent_NFAT_signaling_in_lymphocytes_Pathway_(apoptosis)	NCI 1.2
875	NCI_Role_of_Calcineurin_dependent_NFAT_signaling_in_lymphocytes_Pathway_(positive_T_cell_selection)	NCI 1.2
877	NCI_S1P1_Pathway_(negative_regulation_of_T_cell_proliferation)	NCI 1.2
878	NCI_S1P1_Pathway_(negative_regulation_of_cAMP_metabolic_process)	NCI 1.2
880	NCI_S1P2_Main_Pathway	NCI 1.2
881	NCI_S1P2_Pathway_(chemotaxis)	NCI 1.2
882	NCI_S1P2_Pathway_(regulation_of_vascular_permeability)	NCI 1.2
884	NCI_S1P3_Pathway_(Sinus_Bradycardia)	NCI 1.2
887	NCI_S1P5_Main_Pathway	NCI 1.2
888	NCI_S1P5_Pathway_(negative_regulation_of_cAMP_metabolic_process)	NCI 1.2
889	NCI_S1P5_Pathway_(telencephalon_oligodendrocyte_cell_migration)	NCI 1.2
891	NCI_Signaling_events_mediated_by_HDAC_Class_III_Main_Pathway	NCI 1.2
892	NCI_Signaling_events_mediated_by_HDAC_Class_III_Pathway_(muscle_cell_differentiation)	NCI 1.2
893	NCI_Signaling_events_mediated_by_HDAC_Class_III_Pathway_(regulation_of_S_phase_of_mitotic_cell_cycle)	NCI 1.2
896	NCI_Signaling_events_mediated_by_HDAC_Class_I_Pathway_(histone_deacetylation)	NCI 1.2
897	NCI_Signaling_events_mediated_by_HDAC_Class_I_Pathway_(proteasomal_ubiquitin_dependent_protein_catabolic_process)	NCI 1.2
898	NCI_Signaling_events_mediated_by_Hepatocyte_Growth_Factor_Receptor_c_Met__Main_Pathway	NCI 1.2
899	NCI_Signaling_events_mediated_by_Hepatocyte_Growth_Factor_Receptor_c_Met__Pathway_(Pathway_positive_regulation_of_NF_kappaB_transcription_factor_activity_via_RAF1)	NCI 1.2
900	NCI_Signaling_events_mediated_by_Hepatocyte_Growth_Factor_Receptor_c_Met__Pathway_(apoptosis)	NCI 1.2
901	NCI_Signaling_events_mediated_by_Hepatocyte_Growth_Factor_Receptor_c_Met__Pathway_(positive_regulation_of_tyrosine_phosphorylation_of_STAT_protein)	NCI 1.2
902	NCI_Signaling_events_mediated_by_Hepatocyte_Growth_Factor_Receptor_c_Met__Pathway_(translational_initiation)	NCI 1.2
903	NCI_Signaling_events_mediated_by_PRL_Main_Pathway	NCI 1.2
904	NCI_Signaling_events_mediated_by_PRL_Pathway_(cell_motility)	NCI 1.2
905	NCI_Signaling_events_mediated_by_PRL_Pathway_(mitosis)	NCI 1.2
906	NCI_Signaling_events_mediated_by_PTP1B_Main_Pathway	NCI 1.2
907	NCI_Signaling_events_mediated_by_PTP1B_Pathway_(Ras_protein_signal_transduction)	NCI 1.2
908	NCI_Signaling_events_mediated_by_PTP1B_Pathway_(cell_migration)	NCI 1.2
910	NCI_Signaling_events_mediated_by_Stem_cell_factor_receptor_c_Kit__Pathway_(Pathway_positive_regulation_of_transcription_via_MAPK3)	NCI 1.2
911	NCI_Signaling_events_mediated_by_Stem_cell_factor_receptor_c_Kit__Pathway_(actin_filament_polymerization)	NCI 1.2
913	NCI_Signaling_events_mediated_by_Stem_cell_factor_receptor_c_Kit__Pathway_(cell_motility)	NCI 1.2
914	NCI_Signaling_events_mediated_by_Stem_cell_factor_receptor_c_Kit__Pathway_(cell_proliferation)	NCI 1.2
915	NCI_Signaling_events_mediated_by_Stem_cell_factor_receptor_c_Kit__Pathway_(megakaryocyte_differentiation)	NCI 1.2
916	NCI_Signaling_events_mediated_by_Stem_cell_factor_receptor_c_Kit__Pathway_(positive_regulation_of_cell_proliferation)	NCI 1.2
917	NCI_Signaling_events_mediated_by_Stem_cell_factor_receptor_c_Kit__Pathway_(response_to_radiation)	NCI 1.2
919	NCI_Signaling_events_mediated_by_TCPTP_Pathway_(G1_S_transition_of_mitotic_cell_cycle)	NCI 1.2
920	NCI_Signaling_events_mediated_by_TCPTP_Pathway_(MAPKKK_cascade)	NCI 1.2
922	NCI_Signaling_events_mediated_by_TCPTP_Pathway_(positive_regulation_of_S_phase_of_mitotic_cell_cycle)	NCI 1.2
923	NCI_Signaling_events_mediated_by_TCPTP_Pathway_(regulation_of_gluconeogenesis)	NCI 1.2
925	NCI_Signaling_events_mediated_by_VEGFR1_and_VEGFR2_Pathway_(Pathway_degradation_of_AKAP1)	NCI 1.2
926	NCI_Signaling_events_mediated_by_VEGFR1_and_VEGFR2_Pathway_(angiogenesis)	NCI 1.2
928	NCI_Signaling_events_mediated_by_VEGFR1_and_VEGFR2_Pathway_(focal_adhesion_assembly)	NCI 1.2
929	NCI_Signaling_events_mediated_by_VEGFR1_and_VEGFR2_Pathway_(regulation_of_vascular_permeability)	NCI 1.2
930	NCI_Signaling_events_mediated_by_VEGFR1_and_VEGFR2_Pathway_(stress_fiber_assembly)	NCI 1.2
931	NCI_Signaling_events_mediated_by_focal_adhesion_kinase_Main_Pathway	NCI 1.2
932	NCI_Signaling_events_mediated_by_focal_adhesion_kinase_Pathway_(apoptosis)	NCI 1.2
933	NCI_Signaling_events_mediated_by_focal_adhesion_kinase_Pathway_(cell_migration)	NCI 1.2
934	NCI_Signaling_events_mediated_by_focal_adhesion_kinase_Pathway_(negative_regulation_of_cell_adhesion_involved_in_substrate_bound_cell_migration)	NCI 1.2
935	NCI_Signaling_events_mediated_by_focal_adhesion_kinase_Pathway_(regulation_of_cell_cycle)	NCI 1.2
937	NCI_Signaling_events_mediated_by_the_Hedgehog_family_Pathway_(catabolic_process)	NCI 1.2
938	NCI_Signaling_events_mediated_by_the_Hedgehog_family_Pathway_(determination_of_left_right_symmetry)	NCI 1.2
939	NCI_Signaling_events_mediated_by_the_Hedgehog_family_Pathway_(heart_development)	NCI 1.2
940	NCI_Signaling_events_mediated_by_the_Hedgehog_family_Pathway_(heart_looping)	NCI 1.2
941	NCI_Signaling_events_mediated_by_the_Hedgehog_family_Pathway_(pancreas_development)	NCI 1.2
943	NCI_Signaling_events_mediated_by_the_Hedgehog_family_Pathway_(somite_specification)	NCI 1.2
945	NCI_Signaling_events_regulated_by_Ret_tyrosine_kinase_Pathway_(MAPKKK_cascade)	NCI 1.2
946	NCI_Signaling_events_regulated_by_Ret_tyrosine_kinase_Pathway_(activation_of_MAPKK_activity)	NCI 1.2
947	NCI_Signaling_events_regulated_by_Ret_tyrosine_kinase_Pathway_(lamellipodium_assembly)	NCI 1.2
948	NCI_Signaling_events_regulated_by_Ret_tyrosine_kinase_Pathway_(tube_development)	NCI 1.2
950	NCI_Signaling_mediated_by_p38_gamma_and_p38_delta_Main_Pathway	NCI 1.2
951	NCI_Signaling_mediated_by_p38_gamma_and_p38_delta_Pathway_(G2_M_transition_checkpoint)	NCI 1.2
954	NCI_Stabilization_and_expansion_of_the_E_cadherin_adherens_junction_Pathway_(Wnt_receptor_signaling_pathway)	NCI 1.2
955	NCI_Stabilization_and_expansion_of_the_E_cadherin_adherens_junction_Pathway_(actin_cable_formation)	NCI 1.2
956	NCI_Stabilization_and_expansion_of_the_E_cadherin_adherens_junction_Pathway_(actin_cytoskeleton_organization)	NCI 1.2
957	NCI_Stabilization_and_expansion_of_the_E_cadherin_adherens_junction_Pathway_(adherens_junction_assembly)	NCI 1.2
958	NCI_Stabilization_and_expansion_of_the_E_cadherin_adherens_junction_Pathway_(adherens_junction_organization)	NCI 1.2
959	NCI_Stabilization_and_expansion_of_the_E_cadherin_adherens_junction_Pathway_(cortical_microtubule_organization)	NCI 1.2
960	NCI_Stabilization_and_expansion_of_the_E_cadherin_adherens_junction_Pathway_(epithelial_cell_differentiation)	NCI 1.2
961	NCI_Stabilization_and_expansion_of_the_E_cadherin_adherens_junction_Pathway_(establishment_of_epithelial_cell_apical_basal_polarity)	NCI 1.2
962	NCI_Stabilization_and_expansion_of_the_E_cadherin_adherens_junction_Pathway_(regulation_of_calcium_dependent_cell_cell_adhesion)	NCI 1.2
963	NCI_Stabilization_and_expansion_of_the_E_cadherin_adherens_junction_Pathway_(regulation_of_cell_cell_adhesion)	NCI 1.2
964	NCI_Sumoylation_by_RanBP2_regulates_transcriptional_repression_Main_Pathway	NCI 1.2
982	NCI_TGF_beta_receptor_signaling_Pathway_(JNK_cascade)	NCI 1.2
985	NCI_TRAIL_signaling_Main_Pathway	NCI 1.2
987	NCI_Thromboxane_A2_receptor_signaling_Pathway_(JNK_cascade)	NCI 1.2
993	NCI_Trk_receptor_signaling_mediated_by_PI3K_and_PLC_gamma_Main_Pathway	NCI 1.2
994	NCI_Trk_receptor_signaling_mediated_by_PI3K_and_PLC_gamma_Pathway_(axonogenesis)	NCI 1.2
995	NCI_Trk_receptor_signaling_mediated_by_PI3K_and_PLC_gamma_Pathway_(neuron_apoptosis)	NCI 1.2
996	NCI_Trk_receptor_signaling_mediated_by_PI3K_and_PLC_gamma_Pathway_(regulation_of_long_term_neuronal_synaptic_plasticity)	NCI 1.2
997	NCI_Trk_receptor_signaling_mediated_by_the_MAPK_Main_Pathway	NCI 1.2
998	NCI_Trk_receptor_signaling_mediated_by_the_MAPK_Pathway_(neuron_apoptosis)	NCI 1.2
999	NCI_Trk_receptor_signaling_mediated_by_the_MAPK_Pathway_(neuron_projection_morphogenesis)	NCI 1.2
1001	NCI_Urokinase_type_plasminogen_activator_uPA_and_uPAR_mediated_signaling_Pathway_(cell_adhesion)	NCI 1.2
1002	NCI_Urokinase_type_plasminogen_activator_uPA_and_uPAR_mediated_signaling_Pathway_(cell_migration)	NCI 1.2
1003	NCI_Urokinase_type_plasminogen_activator_uPA_and_uPAR_mediated_signaling_Pathway_(cell_proliferation)	NCI 1.2
1005	NCI_VEGFR3_signaling_in_lymphatic_endothelium_Main_Pathway	NCI 1.2
1006	NCI_VEGFR3_signaling_in_lymphatic_endothelium_Pathway_(DNA_mediated_transformation)	NCI 1.2
1008	NCI_VEGFR3_signaling_in_lymphatic_endothelium_Pathway_(cell_proliferation)	NCI 1.2
1009	NCI_VEGFR3_signaling_in_lymphatic_endothelium_Pathway_(lymphangiogenesis)	NCI 1.2
1010	NCI_VEGFR3_signaling_in_lymphatic_endothelium_Pathway_(vasculogenesis)	NCI 1.2
1013	NCI_Validated_nuclear_estrogen_receptor_beta_network_Main_Pathway	NCI 1.2
1014	NCI_Validated_targets_of_C_MYC_transcriptional_activation_Main_Pathway	NCI 1.2
1015	NCI_Validated_targets_of_C_MYC_transcriptional_activation_Pathway_(Pathway_rRNA_transcription_via_MAX)	NCI 1.2
1017	NCI_Validated_targets_of_C_MYC_transcriptional_repression_Pathway_(cell_cycle_arrest)	NCI 1.2
1018	NCI_Validated_transcriptional_targets_of_AP1_family_members_Fra1_and_Fra2_Main_Pathway	NCI 1.2
1019	NCI_Validated_transcriptional_targets_of_TAp63_isoforms_Main_Pathway	NCI 1.2
1020	NCI_Validated_transcriptional_targets_of_TAp63_isoforms_Pathway_(Metastasis)	NCI 1.2
1021	NCI_Validated_transcriptional_targets_of_TAp63_isoforms_Pathway_(Pathway_degradation_of_TP63)	NCI 1.2
1022	NCI_Validated_transcriptional_targets_of_deltaNp63_isoforms_Main_Pathway	NCI 1.2
1023	NCI_Validated_transcriptional_targets_of_deltaNp63_isoforms_Pathway_(Pathway_degradation_of_TP63)	NCI 1.2
1027	NCI_Wnt_signaling_network_Pathway_(Wnt_receptor_signaling_pathway_through_beta_catenin)	NCI 1.2
1029	NCI_a6b1_and_a6b4_Integrin_signaling_Main_Pathway	NCI 1.2
1030	NCI_a6b1_and_a6b4_Integrin_signaling_Pathway_(Pathway_degradation_of_ITGA6)	NCI 1.2
1031	NCI_a6b1_and_a6b4_Integrin_signaling_Pathway_(Tumor_Cell_Invasion)	NCI 1.2
1032	NCI_a6b1_and_a6b4_Integrin_signaling_Pathway_(apoptosis)	NCI 1.2
1033	NCI_a6b1_and_a6b4_Integrin_signaling_Pathway_(cell_migration)	NCI 1.2
1034	NCI_a6b1_and_a6b4_Integrin_signaling_Pathway_(hemidesmosome_assembly)	NCI 1.2
1035	NCI_a6b1_and_a6b4_Integrin_signaling_Pathway_(proteasomal_ubiquitin_dependent_protein_catabolic_process)	NCI 1.2
1042	NCI_mTOR_signaling_Main_Pathway	NCI 1.2
1043	NCI_mTOR_signaling_Pathway_(Pathway_rRNA_transcription_via_RRN3)	NCI 1.2
1044	NCI_mTOR_signaling_Pathway_(lipid_biosynthetic_process)	NCI 1.2
1045	NCI_mTOR_signaling_Pathway_(regulation_of_actin_cytoskeleton_organization)	NCI 1.2
1046	NCI_mTOR_signaling_Pathway_(regulation_of_protein_stability)	NCI 1.2
1047	NCI_mTOR_signaling_Pathway_(translational_initiation)	NCI 1.2
1048	NCI_p38_MAPK_signaling_Main_Pathway	NCI 1.2
1050	NCI_p38_signaling_mediated_by_MAPKAP_kinases_Pathway_(actin_cytoskeleton_reorganization)	NCI 1.2
1052	NCI_p38_signaling_mediated_by_MAPKAP_kinases_Pathway_(regulation_of_mRNA_stability)	NCI 1.2
1053	NCI_p53_Main_Pathway	NCI 1.2
1054	NCI_p53_Pathway_(apoptosis)	NCI 1.2
1055	NCI_p53_Pathway_(proteasomal_ubiquitin_dependent_protein_catabolic_process)	NCI 1.2
1056	NCI_p73_transcription_factor_network_Main_Pathway	NCI 1.2
1057	NCI_p73_transcription_factor_network_Pathway_(apoptosis)	NCI 1.2
1059	NCI_p75_NTR_mediated_signaling_Pathway_(activation_of_caspase_activity)	NCI 1.2
1060	NCI_p75_NTR_mediated_signaling_Pathway_(cell_cycle_arrest)	NCI 1.2
1061	NCI_p75_NTR_mediated_signaling_Pathway_(neuron_apoptosis)	NCI 1.2
1062	NCI_p75_NTR_mediated_signaling_Pathway_(neuron_projection_morphogenesis)	NCI 1.2
1064	biocarta_acetylation_and_deacetylation_of_rela_in_nucleus_Main_Pathway	Biocarta 1.2
1072	biocarta_ahr_signal_transduction_Main_Pathway	Biocarta 1.2
1076	biocarta_akt_signaling_Main_Pathway	Biocarta 1.2
1077	biocarta_akt_signaling_Pathway_(Pathway_protein_ubiquitination_of_CHUK)	Biocarta 1.2
1078	biocarta_akt_signaling_Pathway_(apoptosis)	Biocarta 1.2
1079	biocarta_akt_signaling_Pathway_(cell_survival)	Biocarta 1.2
1082	biocarta_angiotensin_ii_mediated_activation_of_jnk_pathway_via_pyk2_dependent_signaling_Main_Pathway	Biocarta 1.2
1083	biocarta_apoptotic_signaling_in_response_to_dna_damage_Main_Pathway	Biocarta 1.2
1084	biocarta_apoptotic_signaling_in_response_to_dna_damage_Pathway_(apoptosis)	Biocarta 1.2
1086	biocarta_aspirin_blocks_signaling_pathway_involved_in_platelet_activation_Pathway_(vasoconstriction)	Biocarta 1.2
1087	biocarta_atm_signaling_Main_Pathway	Biocarta 1.2
1088	biocarta_atm_signaling_Pathway_(DNA_repair)	Biocarta 1.2
1089	biocarta_atm_signaling_Pathway_(Pathway_protein_ubiquitination_of_ATM)	Biocarta 1.2
1090	biocarta_atm_signaling_Pathway_(apoptosis)	Biocarta 1.2
1092	biocarta_b_cell_survival_Main_Pathway	Biocarta 1.2
1093	biocarta_b_cell_survival_Pathway_(apoptosis)	Biocarta 1.2
1094	biocarta_b_cell_survival_Pathway_(cell_proliferation)	Biocarta 1.2
1095	biocarta_basic_mechanism_of_action_of_ppara_pparb_d_and_pparg_and_effects_on_gene_expression_Main_Pathway	Biocarta 1.2
1096	biocarta_basic_mechanisms_of_sumoylation_Main_Pathway	Biocarta 1.2
1097	biocarta_basic_mechanisms_of_sumoylation_Pathway_(protein_modification_process)	Biocarta 1.2
1101	biocarta_bone_remodeling_Main_Pathway	Biocarta 1.2
1102	biocarta_bone_remodeling_Pathway_(Pathway_protein_ubiquitination_of_CHUK)	Biocarta 1.2
1103	biocarta_bone_remodeling_Pathway_(osteoclast_differentiation)	Biocarta 1.2
1104	biocarta_brca1_dependent_ub_ligase_activity_Main_Pathway	Biocarta 1.2
1105	biocarta_ca_calmodulin_dependent_protein_kinase_activation_Main_Pathway	Biocarta 1.2
1106	biocarta_calcium_signaling_by_hbx_of_hepatitis_b_virus_Main_Pathway	Biocarta 1.2
1107	biocarta_calcium_signaling_by_hbx_of_hepatitis_b_virus_Pathway_(viral_genome_replication)	Biocarta 1.2
1112	biocarta_cdc25_and_chk1_regulatory_pathway_in_response_to_dna_damage_Main_Pathway	Biocarta 1.2
1113	biocarta_cdk_regulation_of_dna_replication_Main_Pathway	Biocarta 1.2
1114	biocarta_cell_cycle_g1_s_check_point_Main_Pathway	Biocarta 1.2
1115	biocarta_cell_cycle_g2_m_checkpoint_Main_Pathway	Biocarta 1.2
1116	biocarta_cell_cycle_g2_m_checkpoint_Pathway_(DNA_repair)	Biocarta 1.2
1124	biocarta_chaperones_modulate_interferon_signaling_Pathway_(apoptosis)	Biocarta 1.2
1126	biocarta_chromatin_remodeling_by_hswi_snf_atp_dependent_complexes_Main_Pathway	Biocarta 1.2
1127	biocarta_chromatin_remodeling_by_hswi_snf_atp_dependent_complexes_Pathway_(chromatin_remodeling)	Biocarta 1.2
1128	biocarta_control_of_skeletal_myogenesis_by_hdac_and_calcium_calmodulin_dependent_kinase_camk__Main_Pathway	Biocarta 1.2
1131	biocarta_cycling_of_ran_in_nucleocytoplasmic_transport_Main_Pathway	Biocarta 1.2
1132	biocarta_cyclins_and_cell_cycle_regulation_Main_Pathway	Biocarta 1.2
1134	biocarta_d4gdi_signaling_Main_Pathway	Biocarta 1.2
1135	biocarta_d4gdi_signaling_Pathway_(apoptosis)	Biocarta 1.2
1136	biocarta_deregulation_of_cdk5_in_alzheimers_disease_Main_Pathway	Biocarta 1.2
1137	biocarta_deregulation_of_cdk5_in_alzheimers_disease_Pathway_(apoptosis)	Biocarta 1.2
1138	biocarta_double_stranded_rna_induced_gene_expression_Main_Pathway	Biocarta 1.2
1139	biocarta_double_stranded_rna_induced_gene_expression_Pathway_(Pathway_protein_ubiquitination_of_CHUK)	Biocarta 1.2
1140	biocarta_double_stranded_rna_induced_gene_expression_Pathway_(translational_initiation)	Biocarta 1.2
1142	biocarta_e2f1_destruction_Main_Pathway	Biocarta 1.2
1144	biocarta_endocytotic_role_of_ndk_phosphins_and_dynamin_Main_Pathway	Biocarta 1.2
1145	biocarta_endocytotic_role_of_ndk_phosphins_and_dynamin_Pathway_(endocytosis)	Biocarta 1.2
1146	biocarta_epo_signaling_Main_Pathway	Biocarta 1.2
1147	biocarta_erk1_erk2_mapk_signaling_Main_Pathway	Biocarta 1.2
1148	biocarta_erk_and_pi_3_kinase_are_necessary_for_collagen_binding_in_corneal_epithelia_Main_Pathway	Biocarta 1.2
1149	biocarta_erk_and_pi_3_kinase_are_necessary_for_collagen_binding_in_corneal_epithelia_Pathway_(actin_filament_stabilization)	Biocarta 1.2
1150	biocarta_erk_and_pi_3_kinase_are_necessary_for_collagen_binding_in_corneal_epithelia_Pathway_(cell_matrix_adhesion)	Biocarta 1.2
1151	biocarta_eukaryotic_protein_translation_Main_Pathway	Biocarta 1.2
1155	biocarta_fc_epsilon_receptor_i_signaling_in_mast_cells_Pathway_(acid_secretion)	Biocarta 1.2
1174	biocarta_how_does_salmonella_hijack_a_cell_Main_Pathway	Biocarta 1.2
1175	biocarta_how_does_salmonella_hijack_a_cell_Pathway_(lamellipodium_assembly)	Biocarta 1.2
1178	biocarta_human_cytomegalovirus_and_map_kinase_pathways_Main_Pathway	Biocarta 1.2
1179	biocarta_hypoxia_and_p53_in_the_cardiovascular_system_Main_Pathway	Biocarta 1.2
1180	biocarta_hypoxia_inducible_factor_in_the_cardivascular_system_Main_Pathway	Biocarta 1.2
1181	biocarta_ifn_alpha_signaling_Main_Pathway	Biocarta 1.2
1187	biocarta_il_2_receptor_beta_chain_in_t_cell_activation_Pathway_(apoptosis)	Biocarta 1.2
1188	biocarta_il_2_receptor_beta_chain_in_t_cell_activation_Pathway_(cell_proliferation)	Biocarta 1.2
1191	biocarta_il_4_signaling_Main_Pathway	Biocarta 1.2
1192	biocarta_il_4_signaling_Pathway_(G1_phase_of_mitotic_cell_cycle)	Biocarta 1.2
1193	biocarta_il_4_signaling_Pathway_(cell_proliferation)	Biocarta 1.2
1194	biocarta_il_4_signaling_Pathway_(cell_survival)	Biocarta 1.2
1198	biocarta_il_7_signal_transduction_Pathway_(cell_survival)	Biocarta 1.2
1200	biocarta_inactivation_of_gsk3_by_akt_causes_accumulation_of_b_catenin_in_alveolar_macrophages_Pathway_(Pathway_protein_ubiquitination_of_CHUK)	Biocarta 1.2
1201	biocarta_induction_of_apoptosis_through_dr3_and_dr4_5_death_receptors_Main_Pathway	Biocarta 1.2
1202	biocarta_induction_of_apoptosis_through_dr3_and_dr4_5_death_receptors_Pathway_(Pathway_degradation_of_CASP3_CASP10_CASP10)	Biocarta 1.2
1203	biocarta_induction_of_apoptosis_through_dr3_and_dr4_5_death_receptors_Pathway_(apoptosis)	Biocarta 1.2
1204	biocarta_influence_of_ras_and_rho_proteins_on_g1_to_s_transition_Main_Pathway	Biocarta 1.2
1205	biocarta_influence_of_ras_and_rho_proteins_on_g1_to_s_transition_Pathway_(Pathway_protein_ubiquitination_of_CHUK)	Biocarta 1.2
1206	biocarta_inhibition_of_cellular_proliferation_by_gleevec_Main_Pathway	Biocarta 1.2
1209	biocarta_insulin_signaling_Main_Pathway	Biocarta 1.2
1210	biocarta_integrin_signaling_Main_Pathway	Biocarta 1.2
1211	biocarta_internal_ribosome_entry_Main_Pathway	Biocarta 1.2
1212	biocarta_internal_ribosome_entry_Pathway_(translational_initiation)	Biocarta 1.2
1215	biocarta_keratinocyte_differentiation_Pathway_(apoptosis)	Biocarta 1.2
1216	biocarta_keratinocyte_differentiation_Pathway_(keratinocyte_differentiation)	Biocarta 1.2
1218	biocarta_lissencephaly_gene_lis1_in_neuronal_migration_and_development_Main_Pathway	Biocarta 1.2
1219	biocarta_lissencephaly_gene_lis1_in_neuronal_migration_and_development_Pathway_(negative_regulation_of_microtubule_depolymerization)	Biocarta 1.2
1220	biocarta_lissencephaly_gene_lis1_in_neuronal_migration_and_development_Pathway_(retrograde_axon_cargo_transport)	Biocarta 1.2
1221	biocarta_map_kinase_inactivation_of_smrt_corepressor_Main_Pathway	Biocarta 1.2
1224	biocarta_mcalpain_and_friends_in_cell_motility_Pathway_(cell_migration)	Biocarta 1.2
1225	biocarta_mechanism_of_acetaminophen_activity_and_toxicity_Main_Pathway	Biocarta 1.2
1226	biocarta_mechanism_of_acetaminophen_activity_and_toxicity_Pathway_(fever)	Biocarta 1.2
1227	biocarta_mechanism_of_acetaminophen_activity_and_toxicity_Pathway_(inflammatory_response)	Biocarta 1.2
1228	biocarta_mechanism_of_acetaminophen_activity_and_toxicity_Pathway_(platelet_activation)	Biocarta 1.2
1229	biocarta_mechanism_of_acetaminophen_activity_and_toxicity_Pathway_(prostaglandin_biosynthetic_process)	Biocarta 1.2
1230	biocarta_mechanism_of_protein_import_into_the_nucleus_Main_Pathway	Biocarta 1.2
1231	biocarta_mechanisms_of_transcriptional_repression_by_dna_methylation_Main_Pathway	Biocarta 1.2
1232	biocarta_mechanisms_of_transcriptional_repression_by_dna_methylation_Pathway_(histone_deacetylation)	Biocarta 1.2
1233	biocarta_melanocyte_development_and_pigmentation_Main_Pathway	Biocarta 1.2
1234	biocarta_mets_affect_on_macrophage_differentiation_Main_Pathway	Biocarta 1.2
1235	biocarta_mets_affect_on_macrophage_differentiation_Pathway_(RNA_processing)	Biocarta 1.2
1240	biocarta_nerve_growth_factor_pathway_ngf__Main_Pathway	Biocarta 1.2
1244	biocarta_nfkb_activation_by_nontypeable_hemophilus_influenzae_Main_Pathway	Biocarta 1.2
1245	biocarta_nfkb_activation_by_nontypeable_hemophilus_influenzae_Pathway_(Pathway_protein_ubiquitination_of_CHUK)	Biocarta 1.2
1248	biocarta_no2_dependent_il_12_pathway_in_nk_cells_Pathway_(interleukin_12_biosynthetic_process)	Biocarta 1.2
1249	biocarta_nuclear_receptors_coordinate_the_activities_of_chromatin_remodeling_complexes_and_coactivators_to_facilitate_initiation_of_transcription_in_carcinoma_cells_Main_Pathway	Biocarta 1.2
1250	biocarta_opposing_roles_of_aif_in_apoptosis_and_cell_survival_Main_Pathway	Biocarta 1.2
1251	biocarta_opposing_roles_of_aif_in_apoptosis_and_cell_survival_Pathway_(DNA_fragmentation_during_apoptosis)	Biocarta 1.2
1252	biocarta_opposing_roles_of_aif_in_apoptosis_and_cell_survival_Pathway_(removal_of_superoxide_radicals)	Biocarta 1.2
1253	biocarta_overview_of_telomerase_rna_component_gene_hterc_transcriptional_regulation_Main_Pathway	Biocarta 1.2
1254	biocarta_oxidative_stress_induced_gene_expression_via_nrf2_Main_Pathway	Biocarta 1.2
1255	biocarta_p38_mapk_signaling_Main_Pathway	Biocarta 1.2
1256	biocarta_p53_signaling_Main_Pathway	Biocarta 1.2
1261	biocarta_phospholipids_as_signalling_intermediaries_Pathway_(cell_proliferation)	Biocarta 1.2
1262	biocarta_phospholipids_as_signalling_intermediaries_Pathway_(cell_survival)	Biocarta 1.2
1265	biocarta_phosphorylation_of_mek1_by_cdk5_p35_down_regulates_the_map_kinase_Main_Pathway	Biocarta 1.2
1267	biocarta_pkc_catalyzed_phosphorylation_of_inhibitory_phosphoprotein_of_myosin_phosphatase_Pathway_(secretion)	Biocarta 1.2
1268	biocarta_polyadenylation_of_mrna_Main_Pathway	Biocarta 1.2
1269	biocarta_prion_Main_Pathway	Biocarta 1.2
1270	biocarta_proteasome_complex_Main_Pathway	Biocarta 1.2
1271	biocarta_proteasome_complex_Pathway_(Pathway_degradation_of_PSMA1)	Biocarta 1.2
1273	biocarta_pten_dependent_cell_cycle_arrest_and_apoptosis_Main_Pathway	Biocarta 1.2
1274	biocarta_pten_dependent_cell_cycle_arrest_and_apoptosis_Pathway_(cell_migration)	Biocarta 1.2
1275	biocarta_pten_dependent_cell_cycle_arrest_and_apoptosis_Pathway_(cell_survival)	Biocarta 1.2
1277	biocarta_rac1_cell_motility_signaling_Pathway_(actin_filament_depolymerization)	Biocarta 1.2
1281	biocarta_ras_independent_pathway_in_nk_cell_mediated_cytotoxicity_Pathway_(positive_regulation_of_natural_killer_cell_mediated_cytotoxicity)	Biocarta 1.2
1282	biocarta_rb_tumor_suppressor_checkpoint_signaling_in_response_to_dna_damage_Main_Pathway	Biocarta 1.2
1284	biocarta_regulation_of_bad_phosphorylation_Pathway_(apoptosis)	Biocarta 1.2
1286	biocarta_regulation_of_eif2_Main_Pathway	Biocarta 1.2
1288	biocarta_regulation_of_map_kinase_pathways_through_dual_specificity_phosphatases_Main_Pathway	Biocarta 1.2
1289	biocarta_regulation_of_pgc_1a_Main_Pathway	Biocarta 1.2
1290	biocarta_regulation_of_spermatogenesis_by_crem_Main_Pathway	Biocarta 1.2
1291	biocarta_regulation_of_spermatogenesis_by_crem_Pathway_(spermatogenesis)	Biocarta 1.2
1292	biocarta_regulation_of_splicing_through_sam68_Main_Pathway	Biocarta 1.2
1293	biocarta_regulation_of_splicing_through_sam68_Pathway_(negative_regulation_of_cell_growth)	Biocarta 1.2
1294	biocarta_regulation_of_splicing_through_sam68_Pathway_(positive_regulation_of_nuclear_mRNA_splicing_via_spliceosome)	Biocarta 1.2
1295	biocarta_regulation_of_transcriptional_activity_by_pml_Main_Pathway	Biocarta 1.2
1296	biocarta_regulation_of_transcriptional_activity_by_pml_Pathway_(negative_regulation_of_cell_proliferation)	Biocarta 1.2
1303	biocarta_rho_cell_motility_signaling_Pathway_(actin_filament_stabilization)	Biocarta 1.2
1304	biocarta_rho_cell_motility_signaling_Pathway_(focal_adhesion_formation)	Biocarta 1.2
1306	biocarta_rna_polymerase_iii_transcription_Main_Pathway	Biocarta 1.2
1307	biocarta_rna_polymerase_iii_transcription_Pathway_(Pathway_transcription_initiation_via_BDP1)	Biocarta 1.2
1309	biocarta_role_of_brca1_brca2_and_atr_in_cancer_susceptibility_Main_Pathway	Biocarta 1.2
1310	biocarta_role_of_brca1_brca2_and_atr_in_cancer_susceptibility_Pathway_(DNA_replication_termination)	Biocarta 1.2
1311	biocarta_role_of_brca1_brca2_and_atr_in_cancer_susceptibility_Pathway_(Pathway_protein_ubiquitination_of_ATM_BRCA1)	Biocarta 1.2
1312	biocarta_role_of_brca1_brca2_and_atr_in_cancer_susceptibility_Pathway_(regulation_of_DNA_replication)	Biocarta 1.2
1313	biocarta_role_of_egf_receptor_transactivation_by_gpcrs_in_cardiac_hypertrophy_Main_Pathway	Biocarta 1.2
1314	biocarta_role_of_egf_receptor_transactivation_by_gpcrs_in_cardiac_hypertrophy_Pathway_(Pathway_protein_ubiquitination_of_CHUK)	Biocarta 1.2
1315	biocarta_role_of_egf_receptor_transactivation_by_gpcrs_in_cardiac_hypertrophy_Pathway_(cell_growth)	Biocarta 1.2
1317	biocarta_role_of_erk5_in_neuronal_survival_Main_Pathway	Biocarta 1.2
1318	biocarta_role_of_erk5_in_neuronal_survival_Pathway_(cell_survival)	Biocarta 1.2
1319	biocarta_role_of_erk5_in_neuronal_survival_Pathway_(positive_regulation_of_axon_extension)	Biocarta 1.2
1322	biocarta_role_of_mef2d_in_t_cell_apoptosis_Pathway_(Pathway_degradation_of_CAPN2)	Biocarta 1.2
1326	biocarta_role_of_pi3k_subunit_p85_in_regulation_of_actin_organization_and_cell_migration_Main_Pathway	Biocarta 1.2
1327	biocarta_role_of_pi3k_subunit_p85_in_regulation_of_actin_organization_and_cell_migration_Pathway_(filopodium_formation)	Biocarta 1.2
1328	biocarta_role_of_pi3k_subunit_p85_in_regulation_of_actin_organization_and_cell_migration_Pathway_(negative_regulation_of_actin_polymerization_and_or_depolymerization)	Biocarta 1.2
1329	biocarta_role_of_ppar_gamma_coactivators_in_obesity_and_thermogenesis_Main_Pathway	Biocarta 1.2
1330	biocarta_role_of_ppar_gamma_coactivators_in_obesity_and_thermogenesis_Pathway_(fat_cell_differentiation)	Biocarta 1.2
1331	biocarta_role_of_ran_in_mitotic_spindle_regulation_Main_Pathway	Biocarta 1.2
1333	biocarta_signal_dependent_regulation_of_myogenesis_by_corepressor_mitr_Main_Pathway	Biocarta 1.2
1335	biocarta_signal_transduction_through_il1r_Pathway_(Pathway_protein_ubiquitination_of_CHUK_PEBP1)	Biocarta 1.2
1338	biocarta_skeletal_muscle_hypertrophy_is_regulated_via_akt_mtor_Pathway_(muscle_development)	Biocarta 1.2
1340	biocarta_sonic_hedgehog_receptor_ptc1_regulates_cell_cycle_Main_Pathway	Biocarta 1.2
1341	biocarta_sonic_hedgehog_receptor_ptc1_regulates_cell_cycle_Pathway_(cell_cycle_arrest)	Biocarta 1.2
1342	biocarta_sonic_hedgehog_receptor_ptc1_regulates_cell_cycle_Pathway_(re_entry_into_mitotic_cell_cycle)	Biocarta 1.2
1343	biocarta_spliceosomal_assembly_Main_Pathway	Biocarta 1.2
1344	biocarta_sprouty_regulation_of_tyrosine_kinase_signals_Main_Pathway	Biocarta 1.2
1345	biocarta_sprouty_regulation_of_tyrosine_kinase_signals_Pathway_(Pathway_protein_ubiquitination_of_CBL)	Biocarta 1.2
1346	biocarta_sprouty_regulation_of_tyrosine_kinase_signals_Pathway_(cell_migration)	Biocarta 1.2
1347	biocarta_srebp_control_of_lipid_synthesis_Main_Pathway	Biocarta 1.2
1348	biocarta_srebp_control_of_lipid_synthesis_Pathway_(cholesterol_biosynthetic_process)	Biocarta 1.2
1349	biocarta_stat3_signaling_Main_Pathway	Biocarta 1.2
1354	biocarta_sumoylation_as_a_mechanism_to_modulate_ctbp_dependent_gene_responses_Main_Pathway	Biocarta 1.2
1355	biocarta_sumoylation_by_ranbp2_regulates_transcriptional_repression_Main_Pathway	Biocarta 1.2
1363	biocarta_the_igf_1_receptor_and_longevity_Pathway_(Pathway_degradation_of_CAT)	Biocarta 1.2
1364	biocarta_the_igf_1_receptor_and_longevity_Pathway_(cell_survival)	Biocarta 1.2
1366	biocarta_the_prc2_complex_sets_long_term_gene_silencing_through_modification_of_histone_tails_Main_Pathway	Biocarta 1.2
1367	biocarta_the_prc2_complex_sets_long_term_gene_silencing_through_modification_of_histone_tails_Pathway_(histone_deacetylation)	Biocarta 1.2
1368	biocarta_the_prc2_complex_sets_long_term_gene_silencing_through_modification_of_histone_tails_Pathway_(histone_methylation)	Biocarta 1.2
1375	biocarta_toll_like_receptor_Pathway_(Pathway_protein_ubiquitination_of_CHUK_MAP3K1)	Biocarta 1.2
1379	biocarta_transcription_regulation_by_methyltransferase_of_carm1_Pathway_(histone_acetylation)	Biocarta 1.2
1380	biocarta_transcription_regulation_by_methyltransferase_of_carm1_Pathway_(histone_methylation)	Biocarta 1.2
1381	biocarta_transcriptional_activation_of_dbpb_from_mrna_Main_Pathway	Biocarta 1.2
1382	biocarta_trefoil_factors_initiate_mucosal_healing_Main_Pathway	Biocarta 1.2
1383	biocarta_trefoil_factors_initiate_mucosal_healing_Pathway_(Pathway_protein_ubiquitination_of_CHUK)	Biocarta 1.2
1385	biocarta_trka_receptor_signaling_Pathway_(cell_growth_and_or_maintenance)	Biocarta 1.2
1387	biocarta_tumor_suppressor_arf_inhibits_ribosomal_biogenesis_Main_Pathway	Biocarta 1.2
1388	biocarta_tumor_suppressor_arf_inhibits_ribosomal_biogenesis_Pathway_(Pathway_degradation_of_CDKN2A)	Biocarta 1.2
1389	biocarta_tumor_suppressor_arf_inhibits_ribosomal_biogenesis_Pathway_(ribosome_biogenesis)	Biocarta 1.2
1390	biocarta_ucalpain_and_friends_in_cell_spread_Main_Pathway	Biocarta 1.2
1392	biocarta_vegf_hypoxia_and_angiogenesis_Pathway_(cell_migration)	Biocarta 1.2
1394	biocarta_west_nile_virus_Main_Pathway	Biocarta 1.2
1395	biocarta_west_nile_virus_Pathway_(apoptosis)	Biocarta 1.2
1396	biocarta_wnt_lrp6_signalling_Main_Pathway	Biocarta 1.2
1398	biocarta_y_branching_of_actin_filaments_Main_Pathway	Biocarta 1.2
1400	reactome_2_LTR_circle_formation_Main_Pathway	Reactome 1.3
1405	reactome_AKT_mediated_inactivation_of_FOXO1A_Main_Pathway	Reactome 1.3
1406	reactome_AKT_phosphorylates_targets_in_the_cytosol_Main_Pathway	Reactome 1.3
1407	reactome_AKT_phosphorylates_targets_in_the_nucleus_Main_Pathway	Reactome 1.3
1408	reactome_AMPK_inhibits_chREBP_transcriptional_activation_activity_Main_Pathway	Reactome 1.3
1409	reactome_APC_C_Cdc20_mediated_degradation_of_Cyclin_B_Main_Pathway	Reactome 1.3
1410	reactome_APC_C_Cdc20_mediated_degradation_of_Securin_Main_Pathway	Reactome 1.3
1411	reactome_APC_C_Cdc20_mediated_degradation_of_mitotic_proteins_Main_Pathway	Reactome 1.3
1412	reactome_APC_C_Cdh1_mediated_degradation_of_Cdc20_and_other_APC_C_Cdh1_targeted_proteins_in_late_mitosis_early_G1_Main_Pathway	Reactome 1.3
1413	reactome_APC_Cdc20_mediated_degradation_of_Nek2A_Main_Pathway	Reactome 1.3
1414	reactome_APOBEC3G_mediated_resistance_to_HIV_1_infection_Main_Pathway	Reactome 1.3
1415	reactome_ARMS_mediated_activation_Main_Pathway	Reactome 1.3
1416	reactome_ATF6_alpha_activates_chaperone_genes_Main_Pathway	Reactome 1.3
1417	reactome_ATF6_alpha_activates_chaperones_Main_Pathway	Reactome 1.3
1418	reactome_ATM_mediated_phosphorylation_of_repair_proteins_Main_Pathway	Reactome 1.3
1419	reactome_ATP_sensitive_Potassium_channels_Main_Pathway	Reactome 1.3
1420	reactome_AUF1_hnRNP_D0_destabilizes_mRNA_Main_Pathway	Reactome 1.3
1422	reactome_A_third_proteolytic_cleavage_releases_NICD_Main_Pathway	Reactome 1.3
1423	reactome_Abacavir_metabolism_Main_Pathway	Reactome 1.3
1424	reactome_Abacavir_transmembrane_transport_Main_Pathway	Reactome 1.3
1426	reactome_Abortive_elongation_of_HIV_1_transcript_in_the_absence_of_Tat_Main_Pathway	Reactome 1.3
1428	reactome_Acetylcholine_regulates_insulin_secretion_Main_Pathway	Reactome 1.3
1431	reactome_Activation_of_ATR_in_response_to_replication_stress_Main_Pathway	Reactome 1.3
1432	reactome_Activation_of_BAD_and_translocation_to_mitochondria_Main_Pathway	Reactome 1.3
1433	reactome_Activation_of_BID_and_translocation_to_mitochondria_Main_Pathway	Reactome 1.3
1434	reactome_Activation_of_BIM_and_translocation_to_mitochondria_Main_Pathway	Reactome 1.3
1435	reactome_Activation_of_BMF_and_translocation_to_mitochondria_Main_Pathway	Reactome 1.3
1437	reactome_Activation_of_DNA_fragmentation_factor_Main_Pathway	Reactome 1.3
1439	reactome_Activation_of_IRF3_IRF7_mediated_by_TBK1_IKK_epsilon_Main_Pathway	Reactome 1.3
1442	reactome_Activation_of_NIMA_Kinases_NEK9_NEK6_NEK7_Main_Pathway	Reactome 1.3
1443	reactome_Activation_of_NOXA_and_translocation_to_mitochondria_Main_Pathway	Reactome 1.3
1444	reactome_Activation_of_PKB_Main_Pathway	Reactome 1.3
1445	reactome_Activation_of_PPARGC1A_PGC_1alpha_by_phosphorylation_Main_Pathway	Reactome 1.3
1446	reactome_Activation_of_PUMA_and_translocation_to_mitochondria_Main_Pathway	Reactome 1.3
1449	reactome_Activation_of_caspases_through_apoptosome_mediated_cleavage_Main_Pathway	Reactome 1.3
1450	reactome_Activation_of_gene_expression_by_SREBF_SREBP__Main_Pathway	Reactome 1.3
1451	reactome_Activation_of_the_AP_1_family_of_transcription_factors_Main_Pathway	Reactome 1.3
1452	reactome_Activation_of_the_mRNA_upon_binding_of_the_cap_binding_complex_and_eIFs_and_subsequent_binding_to_43S_Main_Pathway	Reactome 1.3
1454	reactome_Activation_of_the_pre_replicative_complex_Main_Pathway	Reactome 1.3
1455	reactome_Acyl_chain_remodeling_of_CL_Main_Pathway	Reactome 1.3
1456	reactome_Acyl_chain_remodeling_of_DAG_and_TAG_Main_Pathway	Reactome 1.3
1462	reactome_Adenosine_P1_receptors_Main_Pathway	Reactome 1.3
1463	reactome_Adenylate_cyclase_activating_Main_Pathway	Reactome 1.3
1464	reactome_Adenylate_cyclase_inhibitory_Main_Pathway	Reactome 1.3
1465	reactome_Adherens_junctions_interactions_Main_Pathway	Reactome 1.3
1467	reactome_Adrenaline_signalling_through_Alpha_2_adrenergic_receptor_Main_Pathway	Reactome 1.3
1468	reactome_Adrenoceptors_Main_Pathway	Reactome 1.3
1470	reactome_Aflatoxin_activation_and_detoxification_Main_Pathway	Reactome 1.3
1472	reactome_Alpha_oxidation_of_phytanate_Main_Pathway	Reactome 1.3
1474	reactome_Amine_compound_SLC_transporters_Main_Pathway	Reactome 1.3
1475	reactome_Amine_ligand_binding_receptors_Main_Pathway	Reactome 1.3
1477	reactome_Amino_acid_synthesis_and_interconversion_transamination__Main_Pathway	Reactome 1.3
1482	reactome_Antigen_Presentation_Folding_assembly_and_peptide_loading_of_class_I_MHC_Main_Pathway	Reactome 1.3
1485	reactome_Apoptotic_cleavage_of_cell_adhesion_proteins_Main_Pathway	Reactome 1.3
1486	reactome_Apoptotic_cleavage_of_cellular_proteins_Main_Pathway	Reactome 1.3
1487	reactome_Arachidonate_production_from_DAG_Main_Pathway	Reactome 1.3
1488	reactome_Asparagine_N_linked_glycosylation_Main_Pathway	Reactome 1.3
1489	reactome_Assembly_Of_The_HIV_Virion_Main_Pathway	Reactome 1.3
1490	reactome_Assembly_of_the_ORC_complex_at_the_origin_of_replication_Main_Pathway	Reactome 1.3
1491	reactome_Assembly_of_the_RAD50_MRE11_NBS1_complex_at_DNA_double_strand_breaks_Main_Pathway	Reactome 1.3
1492	reactome_Assembly_of_the_RAD51_ssDNA_nucleoprotein_complex_Main_Pathway	Reactome 1.3
1495	reactome_Asymmetric_localization_of_PCP_proteins_Main_Pathway	Reactome 1.3
1496	reactome_Attachment_of_GPI_anchor_to_uPAR_Main_Pathway	Reactome 1.3
1497	reactome_Attenuation_phase_Main_Pathway	Reactome 1.3
1498	reactome_Autodegradation_of_Cdh1_by_Cdh1_APC_C_Main_Pathway	Reactome 1.3
1499	reactome_Autodegradation_of_the_E3_ubiquitin_ligase_COP1_Main_Pathway	Reactome 1.3
1500	reactome_Autointegration_results_in_viral_DNA_circles_Main_Pathway	Reactome 1.3
1501	reactome_Axonal_growth_inhibition_RHOA_activation__Main_Pathway	Reactome 1.3
1502	reactome_Axonal_growth_stimulation_Main_Pathway	Reactome 1.3
1503	reactome_BH3_only_proteins_associate_with_and_inactivate_anti_apoptotic_BCL_2_members_Main_Pathway	Reactome 1.3
1505	reactome_Beta_catenin_phosphorylation_cascade_Main_Pathway	Reactome 1.3
1506	reactome_Beta_oxidation_of_butanoyl_CoA_to_acetyl_CoA_Main_Pathway	Reactome 1.3
1507	reactome_Beta_oxidation_of_decanoyl_CoA_to_octanoyl_CoA_CoA_Main_Pathway	Reactome 1.3
1508	reactome_Beta_oxidation_of_hexanoyl_CoA_to_butanoyl_CoA_Main_Pathway	Reactome 1.3
1509	reactome_Beta_oxidation_of_lauroyl_CoA_to_decanoyl_CoA_CoA_Main_Pathway	Reactome 1.3
1510	reactome_Beta_oxidation_of_myristoyl_CoA_to_lauroyl_CoA_Main_Pathway	Reactome 1.3
1511	reactome_Beta_oxidation_of_octanoyl_CoA_to_hexanoyl_CoA_Main_Pathway	Reactome 1.3
1512	reactome_Beta_oxidation_of_palmitoyl_CoA_to_myristoyl_CoA_Main_Pathway	Reactome 1.3
1513	reactome_Beta_oxidation_of_pristanoyl_CoA_Main_Pathway	Reactome 1.3
1514	reactome_Beta_oxidation_of_very_long_chain_fatty_acids_Main_Pathway	Reactome 1.3
1518	reactome_Biosynthesis_of_the_N_glycan_precursor_dolichol_lipid_linked_oligosaccharide_LLO_and_transfer_to_a_nascent_protein_Main_Pathway	Reactome 1.3
1519	reactome_Biotin_transport_and_metabolism_Main_Pathway	Reactome 1.3
1521	reactome_Budding_and_maturation_of_HIV_virion_Main_Pathway	Reactome 1.3
1522	reactome_Butyrate_Response_Factor_1_BRF1_destabilizes_mRNA_Main_Pathway	Reactome 1.3
1526	reactome_CDC6_association_with_the_ORC_origin_complex_Main_Pathway	Reactome 1.3
1527	reactome_CDK_mediated_phosphorylation_and_removal_of_Cdc6_Main_Pathway	Reactome 1.3
1528	reactome_CDO_in_myogenesis_Main_Pathway	Reactome 1.3
1529	reactome_CDT1_association_with_the_CDC6_ORC_origin_complex_Main_Pathway	Reactome 1.3
1531	reactome_COPII_Coat_Protein_2_Mediated_Vesicle_Transport_Main_Pathway	Reactome 1.3
1532	reactome_COPI_Mediated_Transport_Main_Pathway	Reactome 1.3
1533	reactome_CREB_phosphorylation_Main_Pathway	Reactome 1.3
1534	reactome_CREB_phosphorylation_through_the_activation_of_Adenylate_Cyclase_Main_Pathway	Reactome 1.3
1535	reactome_CREB_phosphorylation_through_the_activation_of_CaMKII_Main_Pathway	Reactome 1.3
1536	reactome_CREB_phosphorylation_through_the_activation_of_CaMKK_Main_Pathway	Reactome 1.3
1537	reactome_CREB_phosphorylation_through_the_activation_of_Ras_Main_Pathway	Reactome 1.3
1543	reactome_CaMK_IV_mediated_phosphorylation_of_CREB_Main_Pathway	Reactome 1.3
1544	reactome_Ca_activated_K_channels_Main_Pathway	Reactome 1.3
1545	reactome_Calmodulin_induced_events_Main_Pathway	Reactome 1.3
1546	reactome_Calnexin_calreticulin_cycle_Main_Pathway	Reactome 1.3
1547	reactome_Carnitine_synthesis_Main_Pathway	Reactome 1.3
1548	reactome_Caspase_mediated_cleavage_of_cytoskeletal_proteins_Main_Pathway	Reactome 1.3
1549	reactome_Catecholamine_biosynthesis_Main_Pathway	Reactome 1.3
1551	reactome_Cdc20_Phospho_APC_C_mediated_degradation_of_Cyclin_A_Main_Pathway	Reactome 1.3
1552	reactome_Ceramide_signalling_Main_Pathway	Reactome 1.3
1553	reactome_ChREBP_activates_metabolic_gene_expression_Main_Pathway	Reactome 1.3
1554	reactome_Chk1_Chk2_Cds1_mediated_inactivation_of_Cyclin_B_Cdk1_complex_Main_Pathway	Reactome 1.3
1555	reactome_Cholesterol_biosynthesis_Main_Pathway	Reactome 1.3
1558	reactome_Circadian_Clock_Main_Pathway	Reactome 1.3
1559	reactome_Citric_acid_cycle_TCA_cycle__Main_Pathway	Reactome 1.3
1563	reactome_Classical_Kir_channels_Main_Pathway	Reactome 1.3
1565	reactome_Clathrin_derived_vesicle_budding_Main_Pathway	Reactome 1.3
1566	reactome_Clearance_of_Nuclear_Envelope_Membranes_from_Chromatin_Main_Pathway	Reactome 1.3
1567	reactome_Cleavage_of_Growing_Transcript_in_the_Termination_Region_Main_Pathway	Reactome 1.3
1568	reactome_Cleavage_of_the_damaged_purine_Main_Pathway	Reactome 1.3
1569	reactome_Cleavage_of_the_damaged_pyrimidine_Main_Pathway	Reactome 1.3
1570	reactome_Cobalamin_Cbl_vitamin_B12_transport_and_metabolism_Main_Pathway	Reactome 1.3
1571	reactome_Coenzyme_A_biosynthesis_Main_Pathway	Reactome 1.3
1572	reactome_Cohesin_Loading_onto_Chromatin_Main_Pathway	Reactome 1.3
1576	reactome_Condensation_of_Prometaphase_Chromosomes_Main_Pathway	Reactome 1.3
1577	reactome_Condensation_of_Prophase_Chromosomes_Main_Pathway	Reactome 1.3
1578	reactome_Conjugation_of_benzoate_with_glycine_Main_Pathway	Reactome 1.3
1579	reactome_Conjugation_of_salicylate_with_glycine_Main_Pathway	Reactome 1.3
1580	reactome_Constitutive_PI3K_AKT_Signaling_in_Cancer_Main_Pathway	Reactome 1.3
1581	reactome_Constitutive_Signaling_by_NOTCH1_HD_Domain_Mutants_Main_Pathway	Reactome 1.3
1582	reactome_Constitutive_Signaling_by_NOTCH1_HD_PEST_Domain_Mutants_Main_Pathway	Reactome 1.3
1583	reactome_Constitutive_Signaling_by_NOTCH1_PEST_Domain_Mutants_Main_Pathway	Reactome 1.3
1584	reactome_Constitutive_Signaling_by_NOTCH1_t_7_9_NOTCH1_M1580_K2555_Translocation_Mutant_Main_Pathway	Reactome 1.3
1585	reactome_Conversion_from_APC_C_Cdc20_to_APC_C_Cdh1_in_late_anaphase_Main_Pathway	Reactome 1.3
1587	reactome_Creatine_metabolism_Main_Pathway	Reactome 1.3
1591	reactome_Cyclin_A_B1_associated_events_during_G2_M_transition_Main_Pathway	Reactome 1.3
1592	reactome_Cyclin_A_Cdk2_associated_events_at_S_phase_entry_Main_Pathway	Reactome 1.3
1593	reactome_Cyclin_B2_mediated_events_Main_Pathway	Reactome 1.3
1594	reactome_Cyclin_D_associated_events_in_G1_Main_Pathway	Reactome 1.3
1595	reactome_Cyclin_E_associated_events_during_G1_S_transition_Main_Pathway	Reactome 1.3
1596	reactome_Cytosolic_iron_sulfur_cluster_assembly_Main_Pathway	Reactome 1.3
1597	reactome_Cytosolic_sensors_of_pathogen_associated_DNA_Main_Pathway	Reactome 1.3
1599	reactome_Cytosolic_tRNA_aminoacylation_Main_Pathway	Reactome 1.3
1600	reactome_DAG_and_IP3_signaling_Main_Pathway	Reactome 1.3
1604	reactome_DCC_mediated_attractive_signaling_Main_Pathway	Reactome 1.3
1605	reactome_DNA_Damage_Telomere_Stress_Induced_Senescence_Main_Pathway	Reactome 1.3
1606	reactome_DNA_replication_initiation_Main_Pathway	Reactome 1.3
1607	reactome_DSCAM_interactions_Main_Pathway	Reactome 1.3
1608	reactome_Deadenylation_of_mRNA_Main_Pathway	Reactome 1.3
1609	reactome_Degradation_of_beta_catenin_by_the_destruction_complex_Main_Pathway	Reactome 1.3
1610	reactome_Degradation_of_cysteine_and_homocysteine_Main_Pathway	Reactome 1.3
1613	reactome_Deposition_of_new_CENPA_containing_nucleosomes_at_the_centromere_Main_Pathway	Reactome 1.3
1615	reactome_Detoxification_of_Reactive_Oxygen_Species_Main_Pathway	Reactome 1.3
1616	reactome_Digestion_of_dietary_carbohydrate_Main_Pathway	Reactome 1.3
1619	reactome_Displacement_of_DNA_glycosylase_by_APE1_Main_Pathway	Reactome 1.3
1623	reactome_Downregulation_of_ERBB2_ERBB3_signaling_Main_Pathway	Reactome 1.3
1624	reactome_Downregulation_of_ERBB4_signaling_Main_Pathway	Reactome 1.3
1625	reactome_Downregulation_of_SMAD2_3_SMAD4_transcriptional_activity_Main_Pathway	Reactome 1.3
1626	reactome_Downregulation_of_TGF_beta_receptor_signaling_Main_Pathway	Reactome 1.3
1628	reactome_Downstream_signal_transduction_Main_Pathway	Reactome 1.3
1629	reactome_Dual_incision_reaction_in_GG_NER_Main_Pathway	Reactome 1.3
1630	reactome_Dual_incision_reaction_in_TC_NER_Main_Pathway	Reactome 1.3
1631	reactome_E2F_enabled_inhibition_of_pre_replication_complex_formation_Main_Pathway	Reactome 1.3
1632	reactome_E2F_mediated_regulation_of_DNA_replication_Main_Pathway	Reactome 1.3
1635	reactome_EGFR_downregulation_Main_Pathway	Reactome 1.3
1636	reactome_EGFR_interacts_with_phospholipase_C_gamma_Main_Pathway	Reactome 1.3
1637	reactome_EPHA_mediated_growth_cone_collapse_Main_Pathway	Reactome 1.3
1640	reactome_ERK1_activation_Main_Pathway	Reactome 1.3
1641	reactome_ERK_MAPK_targets_Main_Pathway	Reactome 1.3
1642	reactome_ERKs_are_inactivated_Main_Pathway	Reactome 1.3
1643	reactome_ER_Phagosome_Main_Pathway	Reactome 1.3
1644	reactome_ER_Quality_Control_Compartment_ERQC__Main_Pathway	Reactome 1.3
1645	reactome_Early_Phase_of_HIV_Life_Cycle_Main_Pathway	Reactome 1.3
1649	reactome_Electric_Transmission_Across_Gap_Junctions_Main_Pathway	Reactome 1.3
1650	reactome_Elevation_of_cytosolic_Ca2_levels_Main_Pathway	Reactome 1.3
1651	reactome_Elongation_arrest_and_recovery_Main_Pathway	Reactome 1.3
1653	reactome_Endosomal_Sorting_Complex_Required_For_Transport_ESCRT__Main_Pathway	Reactome 1.3
1656	reactome_Erythrocytes_take_up_carbon_dioxide_and_release_oxygen_Main_Pathway	Reactome 1.3
1657	reactome_Erythrocytes_take_up_oxygen_and_release_carbon_dioxide_Main_Pathway	Reactome 1.3
1658	reactome_Establishment_of_Sister_Chromatid_Cohesion_Main_Pathway	Reactome 1.3
1659	reactome_Ethanol_oxidation_Main_Pathway	Reactome 1.3
1660	reactome_Eukaryotic_Translation_Elongation_Main_Pathway	Reactome 1.3
1661	reactome_Eukaryotic_Translation_Termination_Main_Pathway	Reactome 1.3
1668	reactome_FGFR1c_ligand_binding_and_activation_Main_Pathway	Reactome 1.3
1670	reactome_FGFR2c_ligand_binding_and_activation_Main_Pathway	Reactome 1.3
1671	reactome_FGFR3b_ligand_binding_and_activation_Main_Pathway	Reactome 1.3
1672	reactome_FGFR3c_ligand_binding_and_activation_Main_Pathway	Reactome 1.3
1673	reactome_FGFR4_ligand_binding_and_activation_Main_Pathway	Reactome 1.3
1677	reactome_Fanconi_Anemia_Main_Pathway	Reactome 1.3
1679	reactome_Fatty_Acids_bound_to_GPR40_FFAR1_regulate_insulin_secretion_Main_Pathway	Reactome 1.3
1680	reactome_Fatty_Acyl_CoA_Biosynthesis_Main_Pathway	Reactome 1.3
1685	reactome_Folding_of_actin_by_CCT_TriC_Main_Pathway	Reactome 1.3
1686	reactome_Formation_of_ATP_by_chemiosmotic_coupling_Main_Pathway	Reactome 1.3
1687	reactome_Formation_of_HIV_1_elongation_complex_containing_HIV_1_Tat_Main_Pathway	Reactome 1.3
1688	reactome_Formation_of_HIV_elongation_complex_in_the_absence_of_HIV_Tat_Main_Pathway	Reactome 1.3
1689	reactome_Formation_of_RNA_Pol_II_elongation_complex_Main_Pathway	Reactome 1.3
1690	reactome_Formation_of_Senescence_Associated_Heterochromatin_Foci_SAHF__Main_Pathway	Reactome 1.3
1691	reactome_Formation_of_a_pool_of_free_40S_subunits_Main_Pathway	Reactome 1.3
1692	reactome_Formation_of_annular_gap_junctions_Main_Pathway	Reactome 1.3
1693	reactome_Formation_of_apoptosome_Main_Pathway	Reactome 1.3
1694	reactome_Formation_of_incision_complex_in_GG_NER_Main_Pathway	Reactome 1.3
1695	reactome_Formation_of_the_Early_Elongation_Complex_Main_Pathway	Reactome 1.3
1696	reactome_Formation_of_the_HIV_1_Early_Elongation_Complex_Main_Pathway	Reactome 1.3
1697	reactome_Formation_of_the_active_cofactor_UDP_glucuronate_Main_Pathway	Reactome 1.3
1698	reactome_Formation_of_the_ternary_complex_and_subsequently_the_43S_complex_Main_Pathway	Reactome 1.3
1699	reactome_Formation_of_transcription_coupled_NER_TC_NER_repair_complex_Main_Pathway	Reactome 1.3
1700	reactome_Formation_of_tubulin_folding_intermediates_by_CCT_TriC_Main_Pathway	Reactome 1.3
1703	reactome_Frs2_mediated_activation_Main_Pathway	Reactome 1.3
1704	reactome_G0_and_Early_G1_Main_Pathway	Reactome 1.3
1705	reactome_G1_S_Specific_Transcription_Main_Pathway	Reactome 1.3
1706	reactome_G2_M_DNA_damage_checkpoint_Main_Pathway	Reactome 1.3
1707	reactome_G2_M_DNA_replication_checkpoint_Main_Pathway	Reactome 1.3
1708	reactome_G2_Phase_Main_Pathway	Reactome 1.3
1709	reactome_GAB1_signalosome_Main_Pathway	Reactome 1.3
1710	reactome_GABA_A_rho_receptor_activation_Main_Pathway	Reactome 1.3
1715	reactome_GRB2_events_in_EGFR_signaling_Main_Pathway	Reactome 1.3
1716	reactome_GRB2_events_in_ERBB2_signaling_Main_Pathway	Reactome 1.3
1717	reactome_GTP_hydrolysis_and_joining_of_the_60S_ribosomal_subunit_Main_Pathway	Reactome 1.3
1726	reactome_Galactose_catabolism_Main_Pathway	Reactome 1.3
1728	reactome_Gap_junction_assembly_Main_Pathway	Reactome 1.3
1729	reactome_Gap_junction_degradation_Main_Pathway	Reactome 1.3
1730	reactome_Gastrin_CREB_signalling_pathway_via_PKC_and_MAPK_Main_Pathway	Reactome 1.3
1736	reactome_Gluconeogenesis_Main_Pathway	Reactome 1.3
1740	reactome_Glutathione_synthesis_and_recycling_Main_Pathway	Reactome 1.3
1741	reactome_Glycogen_breakdown_glycogenolysis__Main_Pathway	Reactome 1.3
1742	reactome_Glycogen_synthesis_Main_Pathway	Reactome 1.3
1743	reactome_Glycolysis_Main_Pathway	Reactome 1.3
1744	reactome_Glycoprotein_hormones_Main_Pathway	Reactome 1.3
1746	reactome_Glyoxylate_metabolism_Main_Pathway	Reactome 1.3
1747	reactome_Golgi_Associated_Vesicle_Biogenesis_Main_Pathway	Reactome 1.3
1748	reactome_Golgi_Cisternae_Pericentriolar_Stack_Reorganization_Main_Pathway	Reactome 1.3
1750	reactome_HATs_acetylate_histones_Main_Pathway	Reactome 1.3
1751	reactome_HDACs_deacetylate_histones_Main_Pathway	Reactome 1.3
1753	reactome_HDMs_demethylate_histones_Main_Pathway	Reactome 1.3
1754	reactome_HIV_Transcription_Initiation_Main_Pathway	Reactome 1.3
1755	reactome_HIV_elongation_arrest_and_recovery_Main_Pathway	Reactome 1.3
1756	reactome_HSF1_activation_Main_Pathway	Reactome 1.3
1757	reactome_HSF1_dependent_transactivation_Main_Pathway	Reactome 1.3
1761	reactome_Heme_biosynthesis_Main_Pathway	Reactome 1.3
1762	reactome_Heme_degradation_Main_Pathway	Reactome 1.3
1764	reactome_Hh_ligand_biogenesis_disease_Main_Pathway	Reactome 1.3
1768	reactome_HuR_stabilizes_mRNA_Main_Pathway	Reactome 1.3
1769	reactome_Hyaluronan_biosynthesis_and_export_Main_Pathway	Reactome 1.3
1771	reactome_Hydrolysis_of_LPC_Main_Pathway	Reactome 1.3
1773	reactome_Hypusinylation_Main_Pathway	Reactome 1.3
1774	reactome_IKK_complex_recruitment_mediated_by_RIP1_Main_Pathway	Reactome 1.3
1775	reactome_IRAK1_recruits_IKK_complex_Main_Pathway	Reactome 1.3
1776	reactome_IRAK1_recruits_IKK_complex_upon_TLR7_8_or_9_stimulation_Main_Pathway	Reactome 1.3
1777	reactome_IRAK2_mediated_activation_of_TAK1_complex_Main_Pathway	Reactome 1.3
1778	reactome_IRAK2_mediated_activation_of_TAK1_complex_upon_TLR7_8_or_9_stimulation_Main_Pathway	Reactome 1.3
1779	reactome_IRF3_mediated_activation_of_type_1_IFN_Main_Pathway	Reactome 1.3
1781	reactome_IRS_activation_Main_Pathway	Reactome 1.3
1784	reactome_Inactivation_of_APC_C_via_direct_inhibition_of_the_APC_C_complex_Main_Pathway	Reactome 1.3
1786	reactome_Inflammasomes_Main_Pathway	Reactome 1.3
1787	reactome_Inhibition_of_TSC_complex_formation_by_PKB_Main_Pathway	Reactome 1.3
1788	reactome_Inhibition_of_replication_initiation_of_damaged_DNA_by_RB1_E2F1_Main_Pathway	Reactome 1.3
1791	reactome_Initiation_of_Nuclear_Envelope_Reformation_Main_Pathway	Reactome 1.3
1792	reactome_Inositol_transporters_Main_Pathway	Reactome 1.3
1796	reactome_Integration_of_energy_metabolism_Main_Pathway	Reactome 1.3
1797	reactome_Integration_of_provirus_Main_Pathway	Reactome 1.3
1798	reactome_Integration_of_viral_DNA_into_host_genomic_DNA_Main_Pathway	Reactome 1.3
1802	reactome_Interconversion_of_2_oxoglutarate_and_2_hydroxyglutarate_Main_Pathway	Reactome 1.3
1803	reactome_Interconversion_of_polyamines_Main_Pathway	Reactome 1.3
1804	reactome_Interferon_alpha_beta_signaling_Main_Pathway	Reactome 1.3
1813	reactome_Ion_transport_by_P_type_ATPases_Main_Pathway	Reactome 1.3
1815	reactome_JNK_c_Jun_kinases_phosphorylation_and_activation_mediated_by_activated_human_TAK1_Main_Pathway	Reactome 1.3
[truncated: 346 more rows]
